# Supplementary material for: Xanthenones: calixarenes-catalyzed syntheses, anticancer activity and QSAR studies
Source: Royal Society of Chemistry journal article supplement (doi:10.1039/c4ob02611j), 2015-01-01

## Supporting Information

### Xanthenones: Calixarenes-catalyzed Syntheses, Anticancer Activity and QSAR Studies

**Daniel Leite da Silva,<sup>a</sup> Bruna Silva Terra,<sup>a</sup> Mateus Ribeiro Lage,<sup>b</sup> Ana Lúcia Tasca Góis Ruiz,<sup>c</sup> Cameron Capeletti da Silva,<sup>d</sup> João Ernesto de Carvalho,<sup>c</sup> José Walkimar de Mesquita Carneiro,<sup>b</sup> Felipe Terra Martins,<sup>d</sup> Sergio Antonio Fernandes,<sup>e</sup> and Ângelo de Fátima,<sup>\*a</sup>**

<sup>a</sup>Grupo de Estudos em Química Orgânica e Biológica (GEQOB), Departamento de Química, Instituto de Ciências Exatas, Universidade Federal de Minas Gerais, Belo Horizonte, MG, 31270-901, Brazil. Fax: +55-31-3409-5700; Tel: +55-31-3409-6373; E-mail: adefatima@qui.ufmg.br

<sup>b</sup>Instituto de Química, Universidade Federal Fluminense, Campus do Valonguinho, Niterói, RJ, 24220-900, Brazil.

<sup>c</sup>Centro Pluridisciplinar de Pesquisas Químicas, Biológicas e Agrícolas (CPQBA), Universidade Estadual de Campinas, Paulínia, SP, 13081-970, Brazil.

<sup>d</sup>Instituto de Química, Universidade Federal de Goiás, Goiânia, GO, 74690-900, Brazil.

<sup>e</sup>Grupo de Química Supramolecular e Biomimética (GQSB), Departamento de Química, Universidade Federal de Viçosa, Viçosa, MG, 36570-900, Brazil.

### Table of contents

| <b>Contents</b>                                | <b>Page No.</b> |
|------------------------------------------------|-----------------|
| <sup>1</sup> H and <sup>13</sup> C NMR Spectra | S2-S60          |

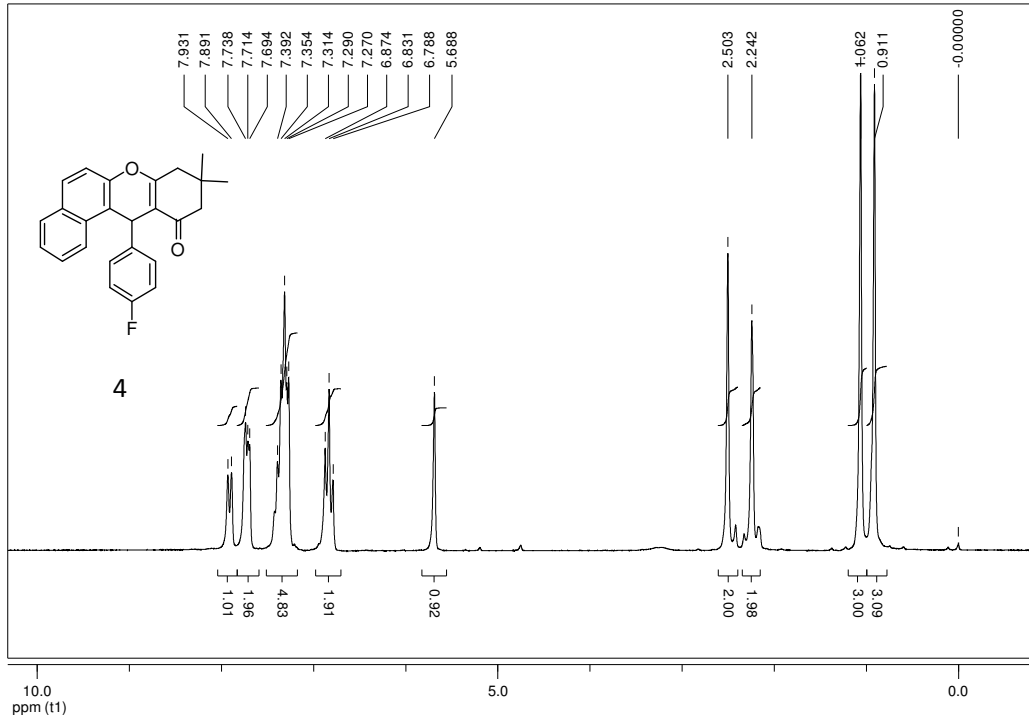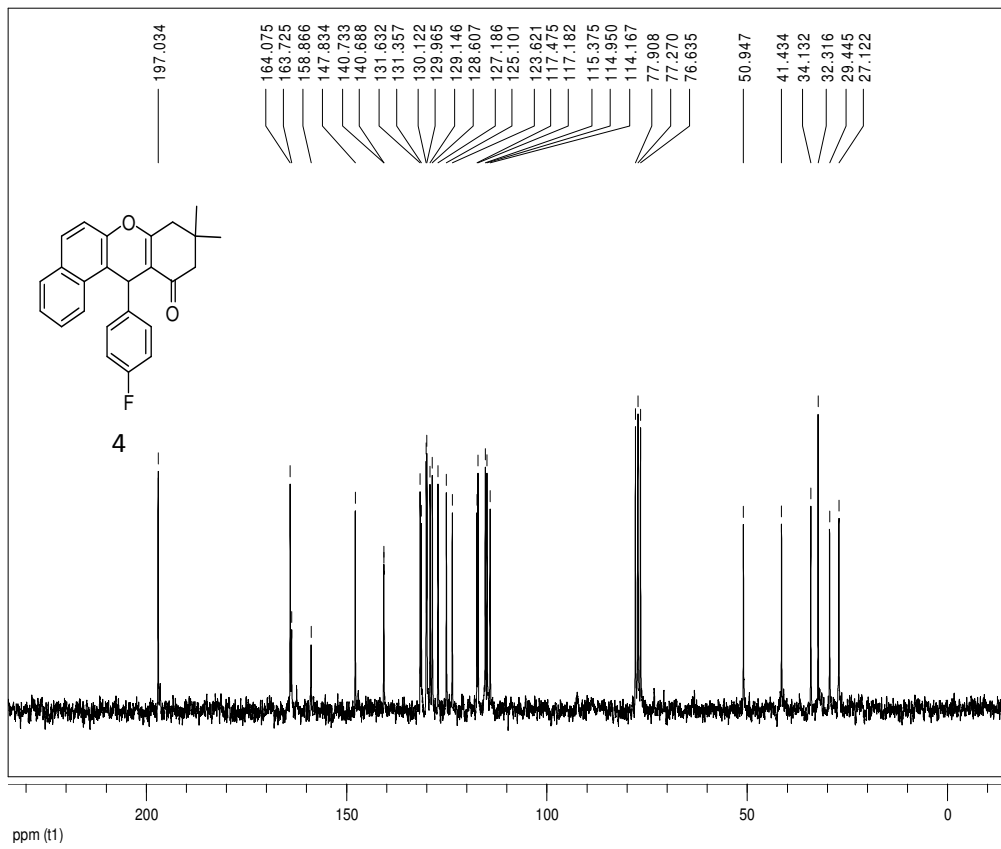

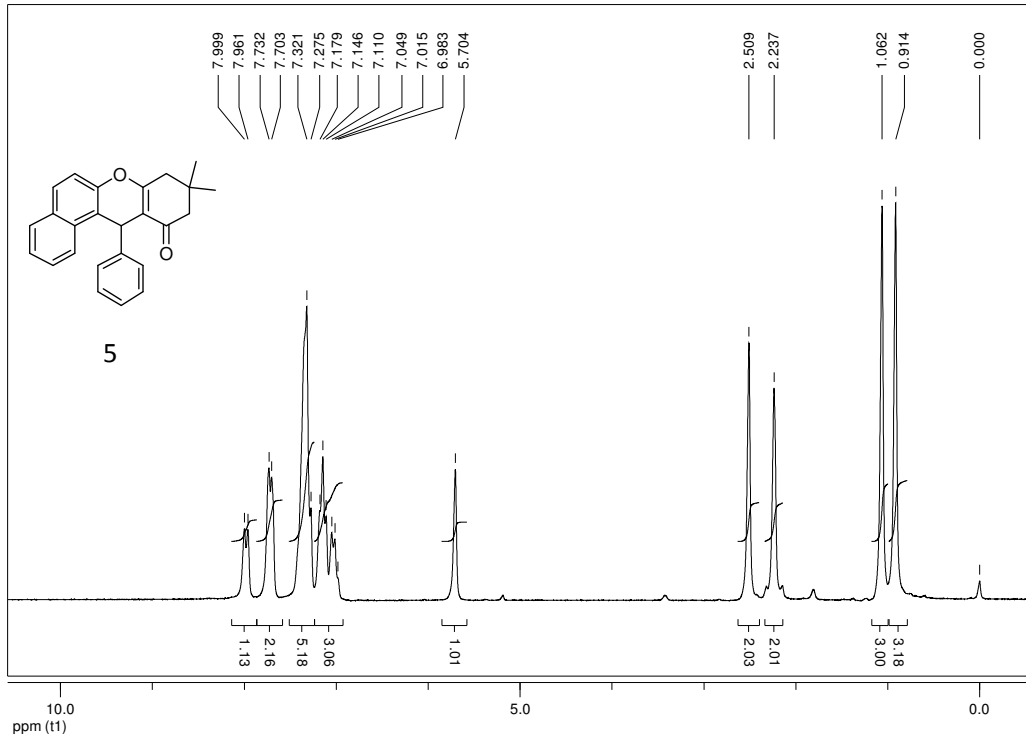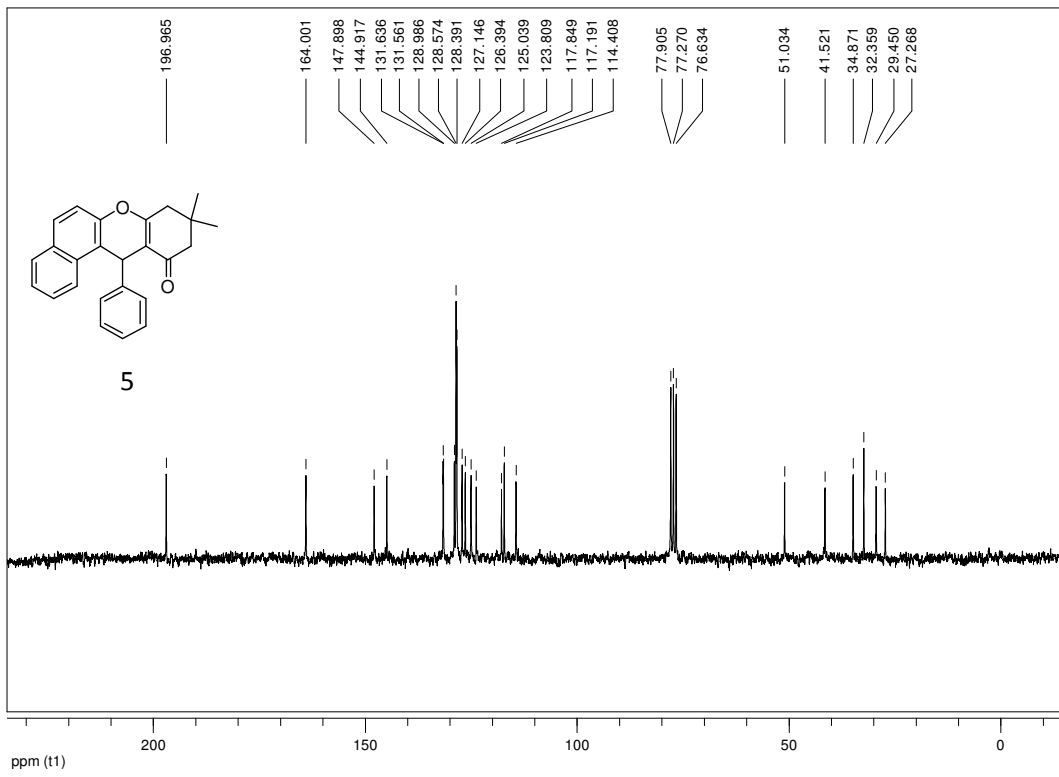

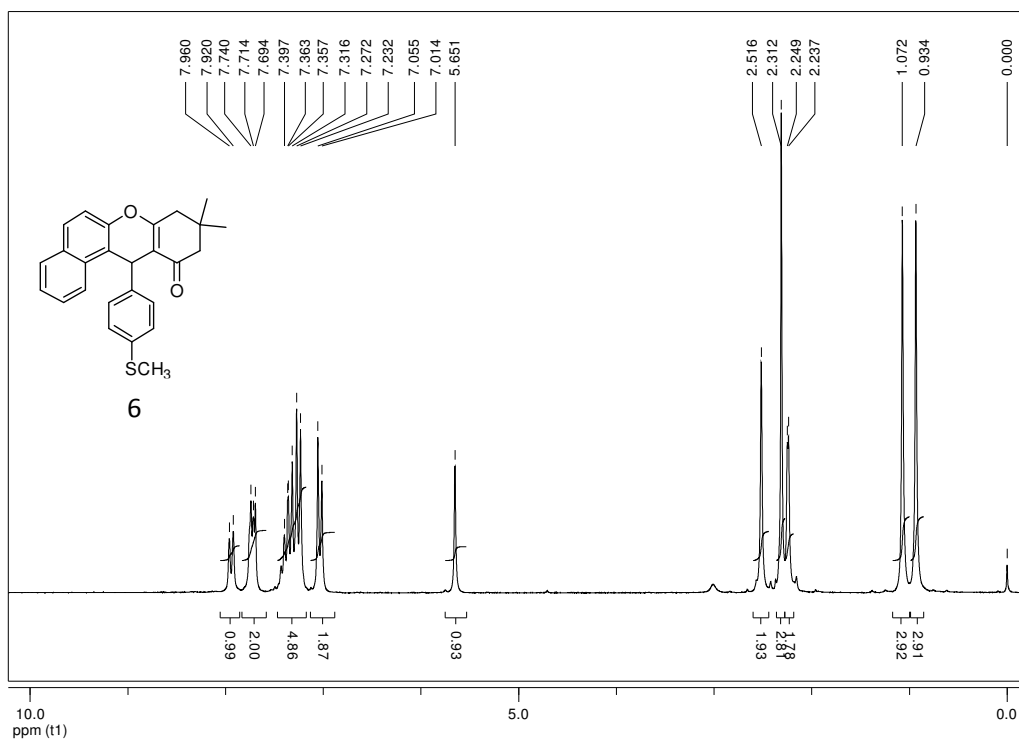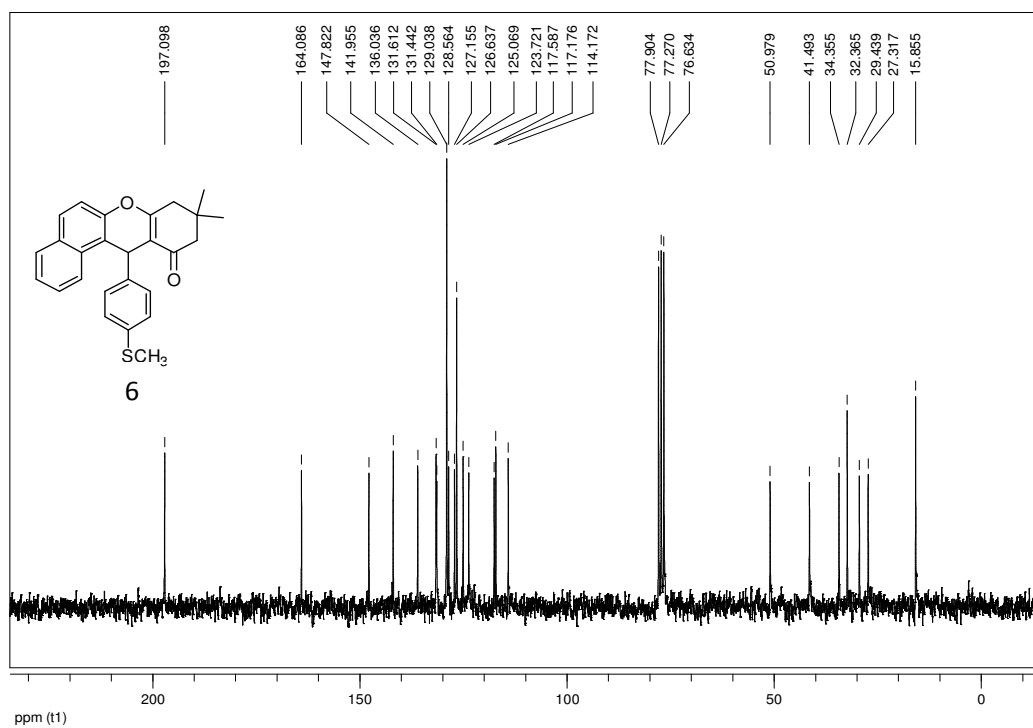

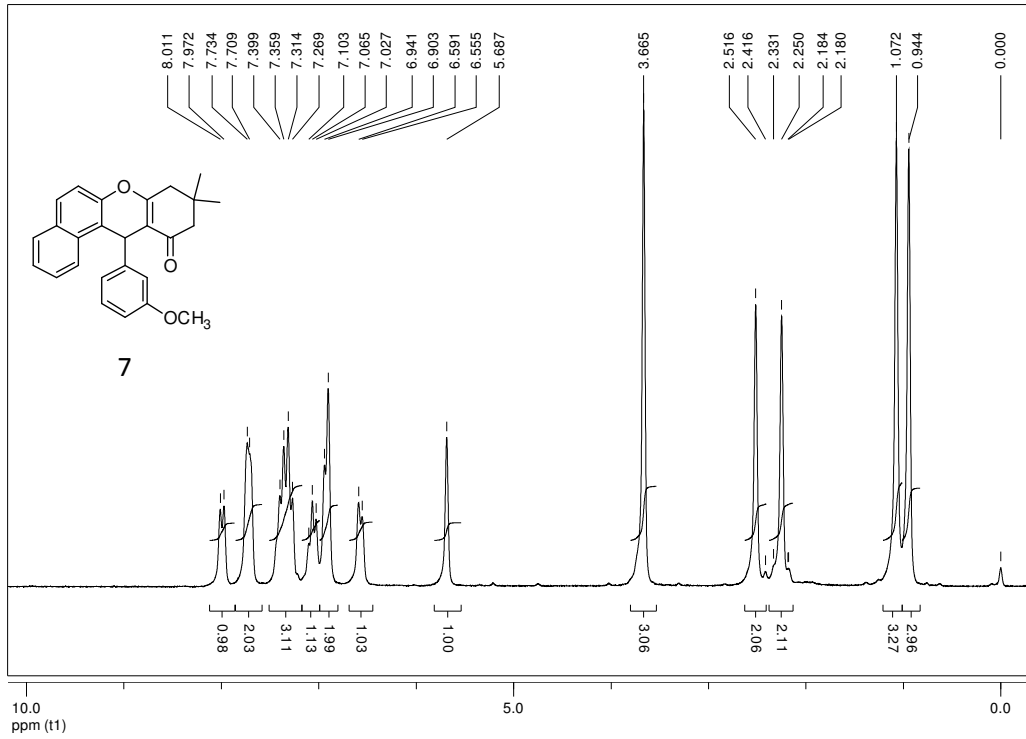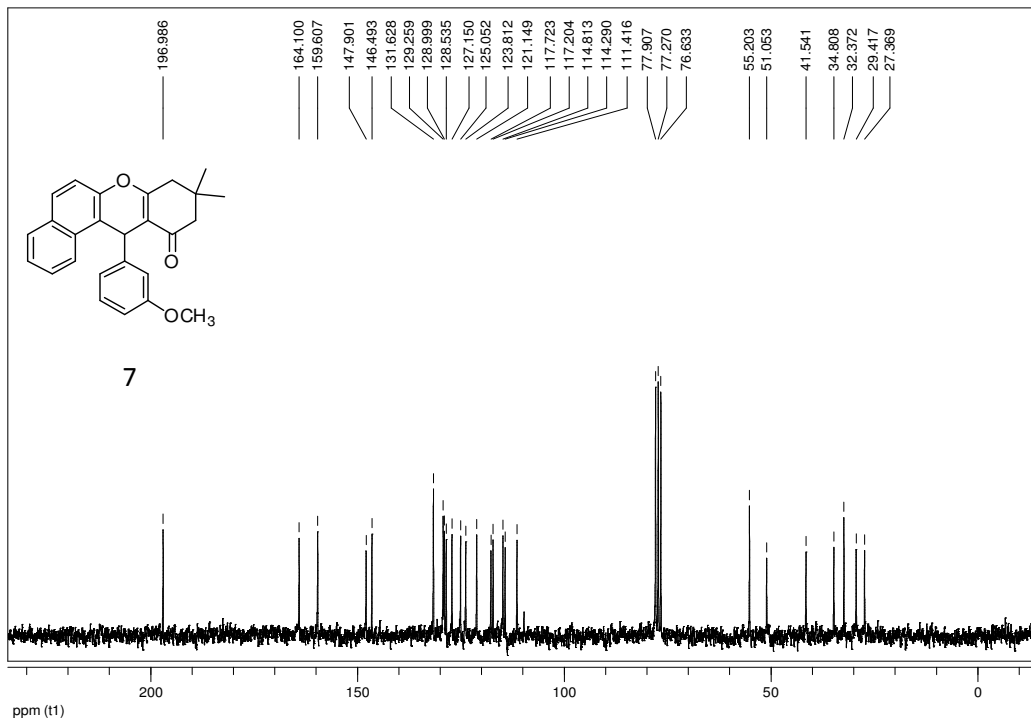

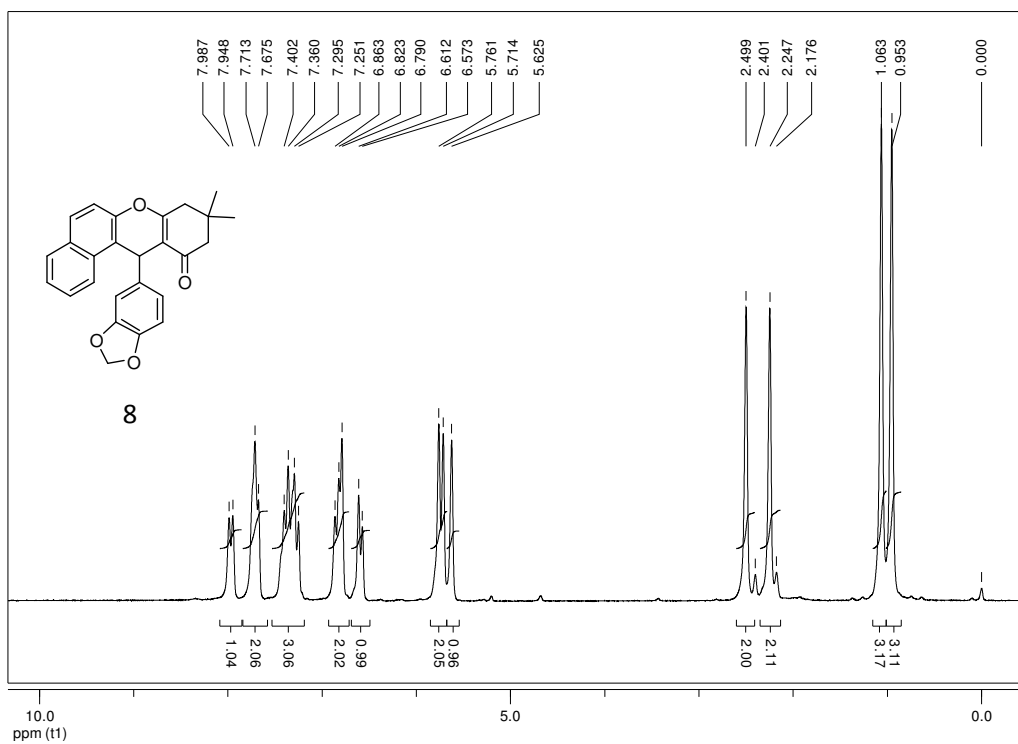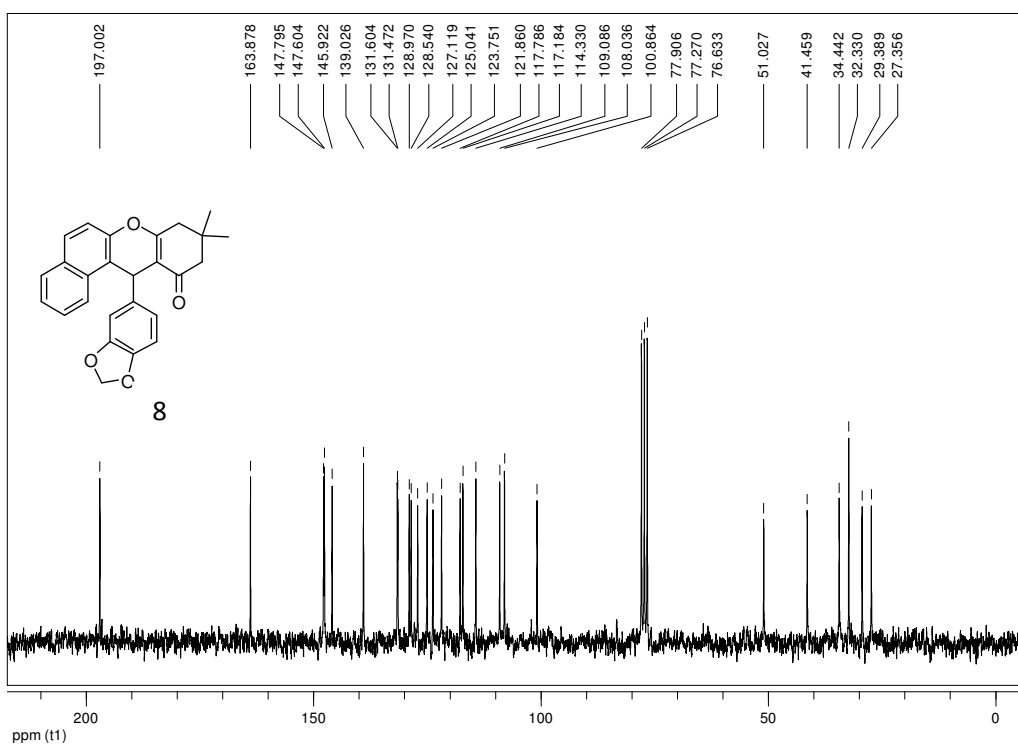

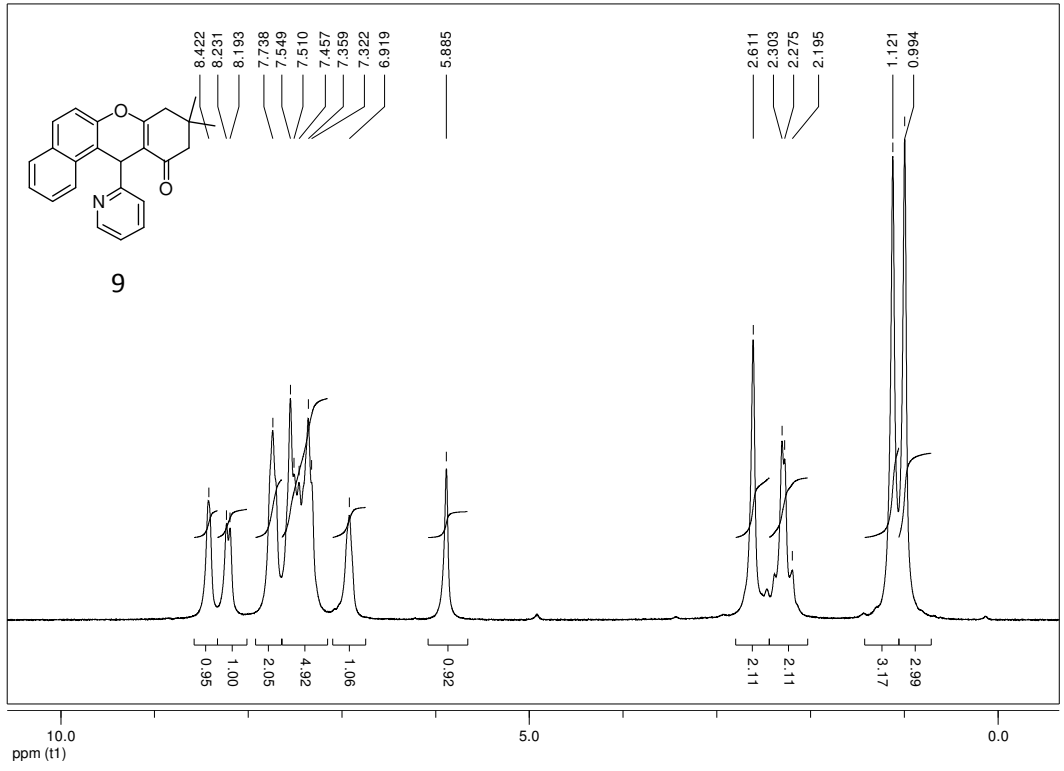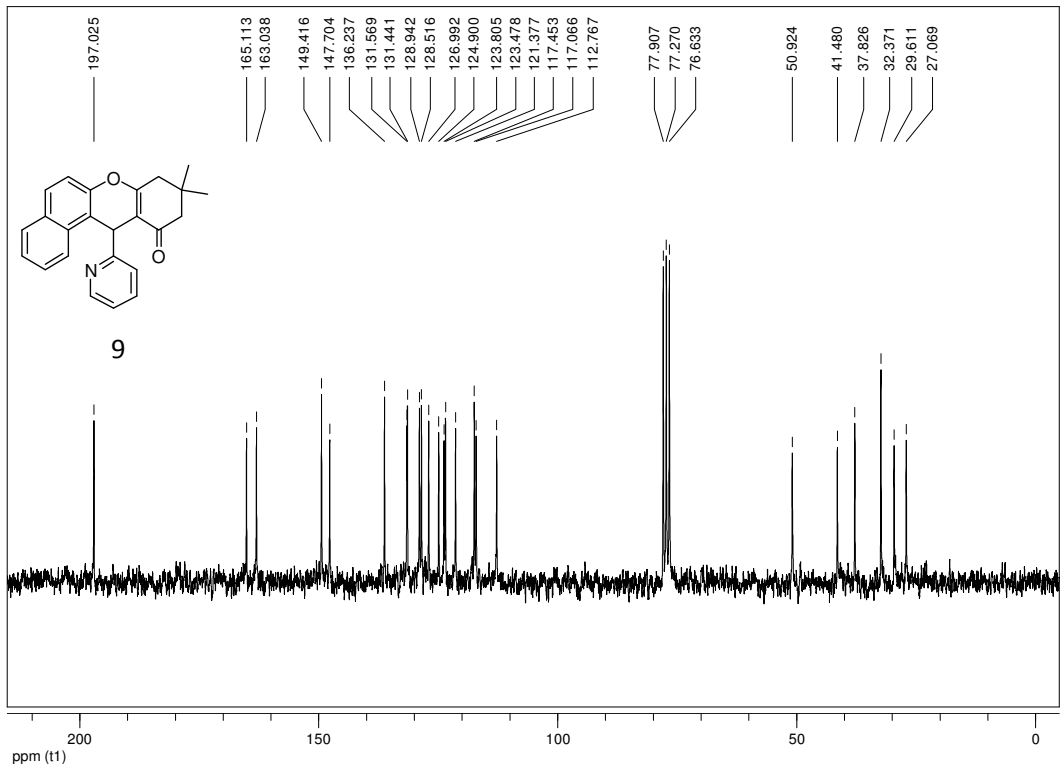

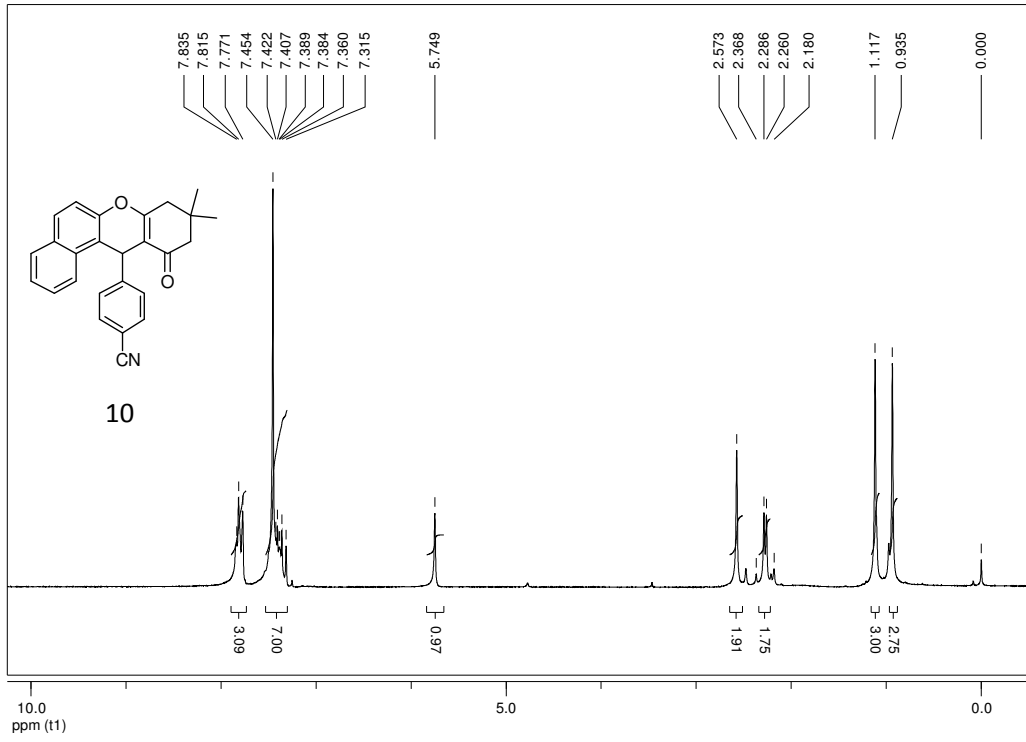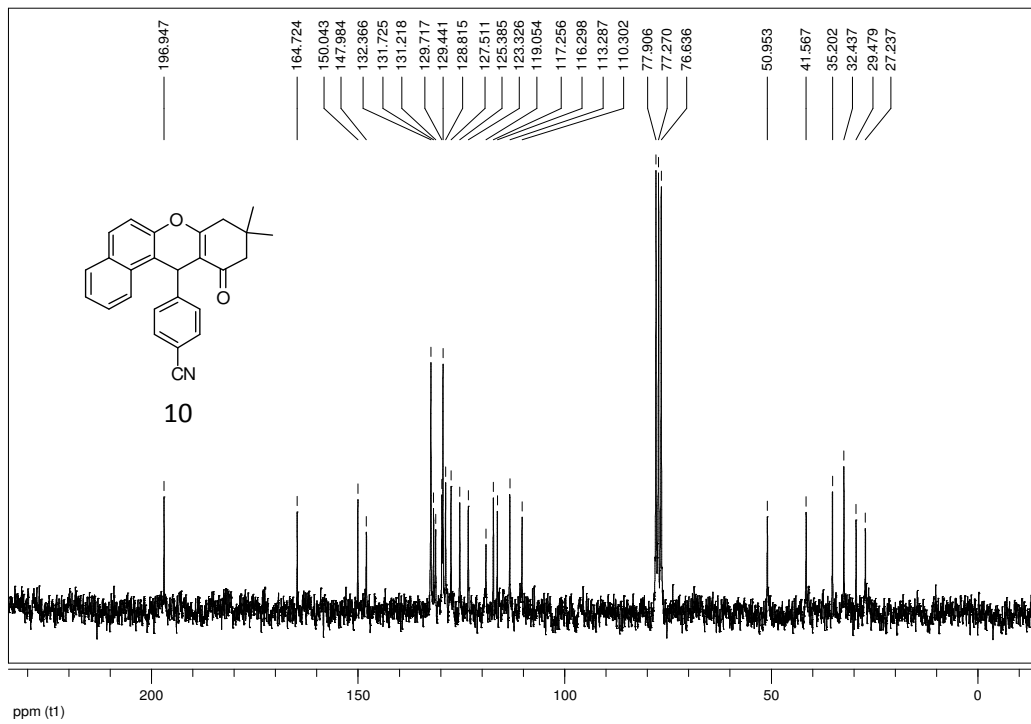



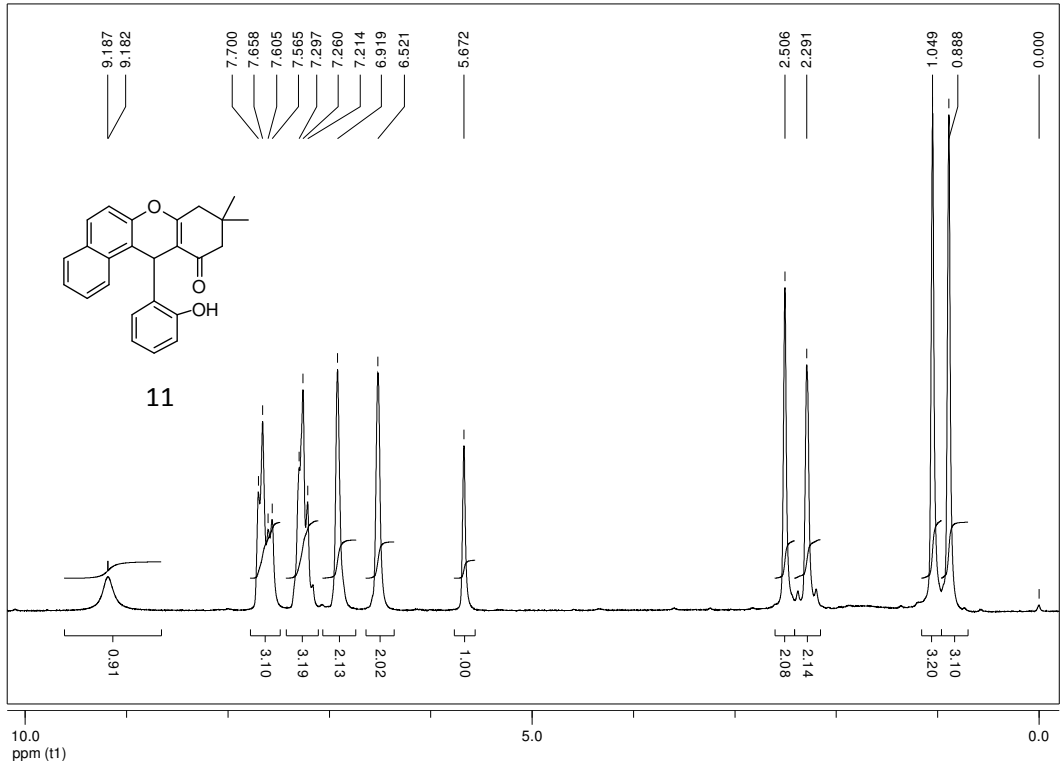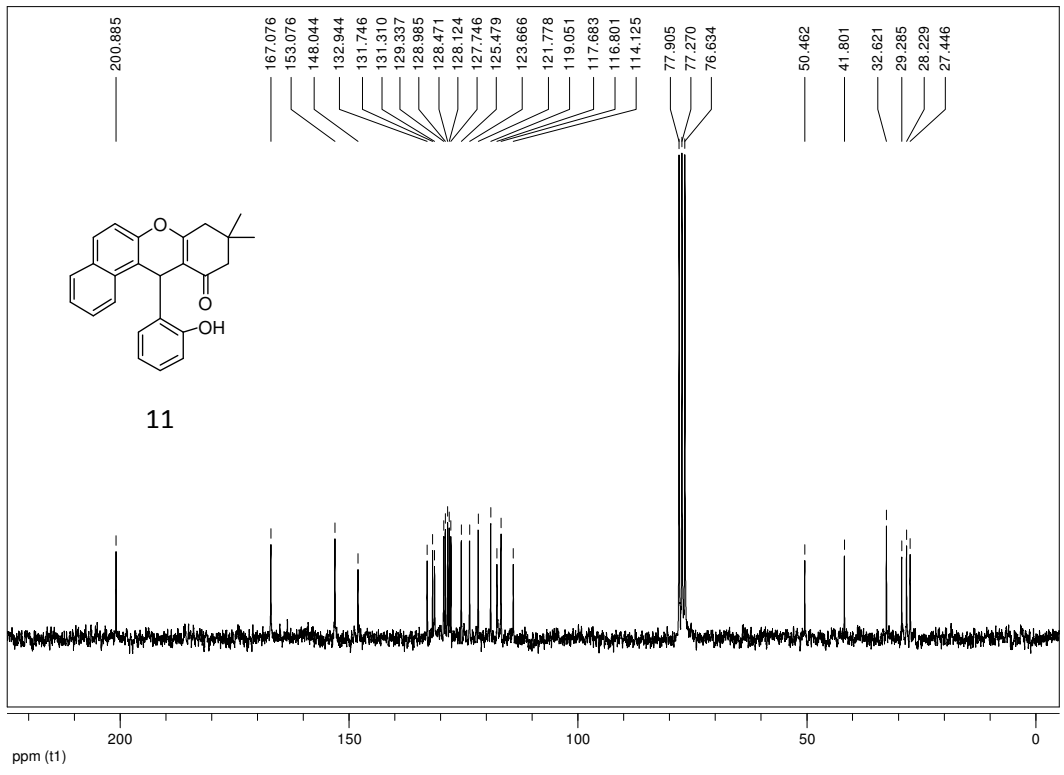

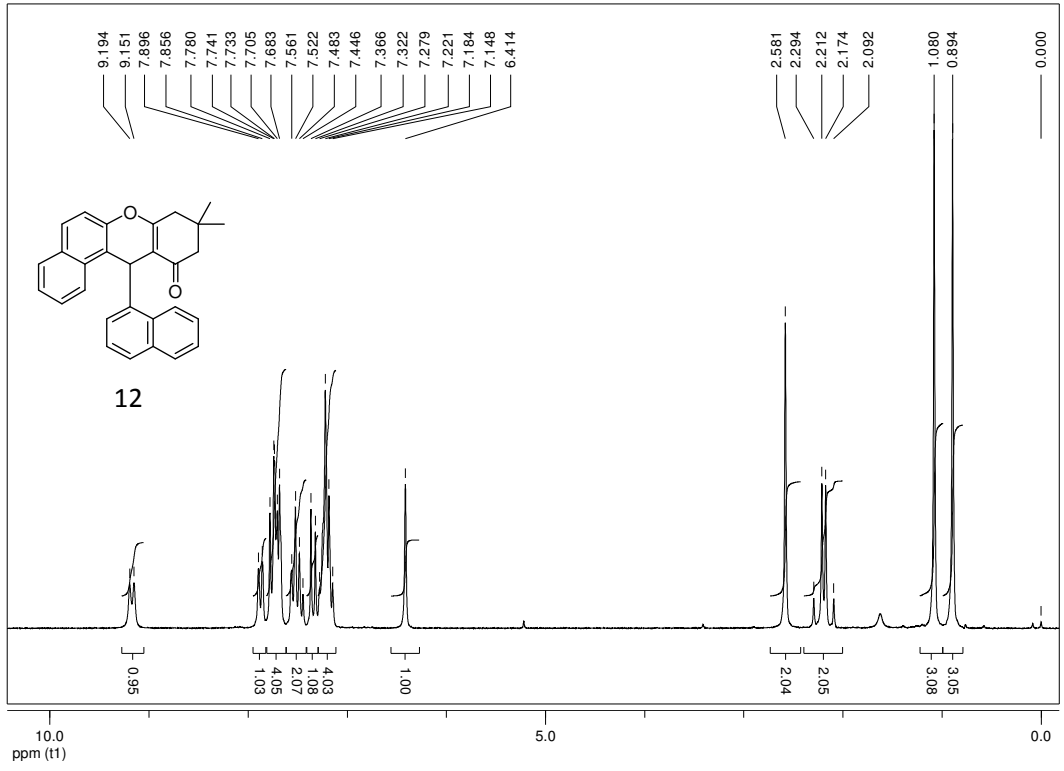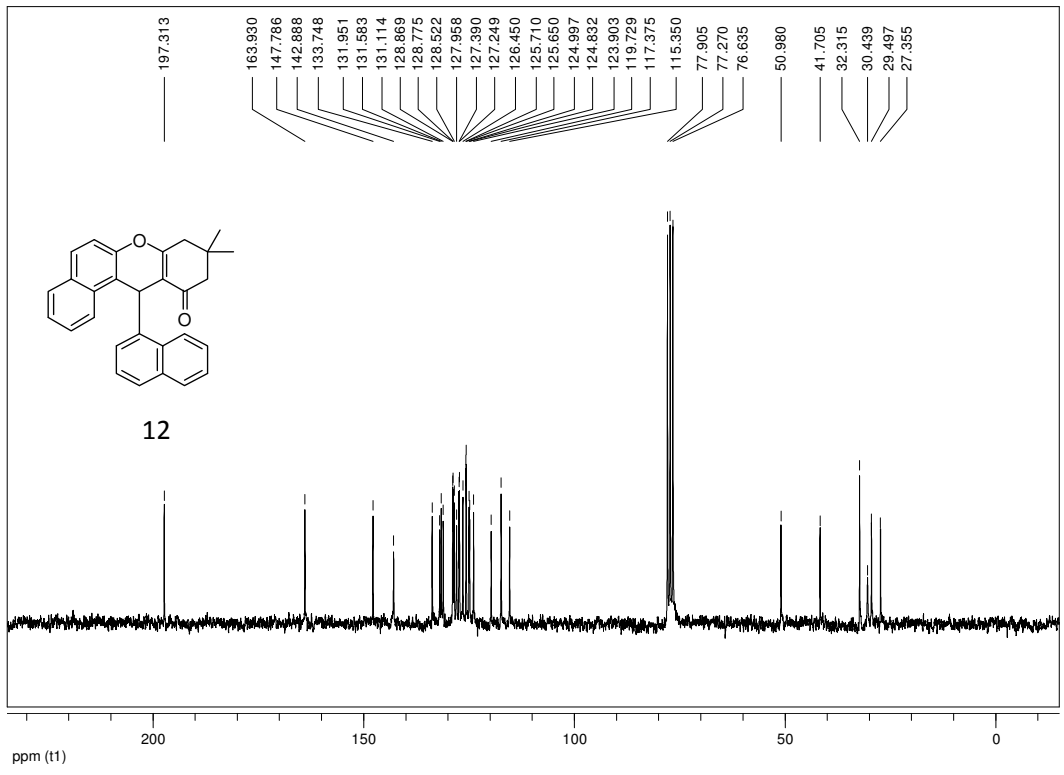

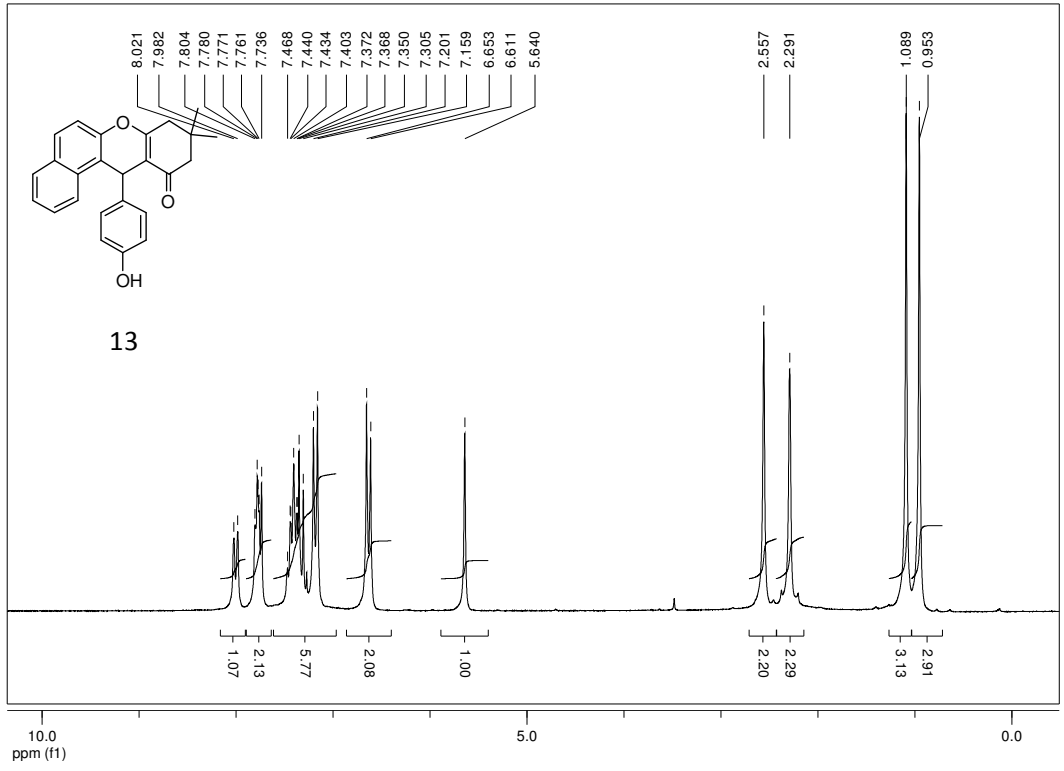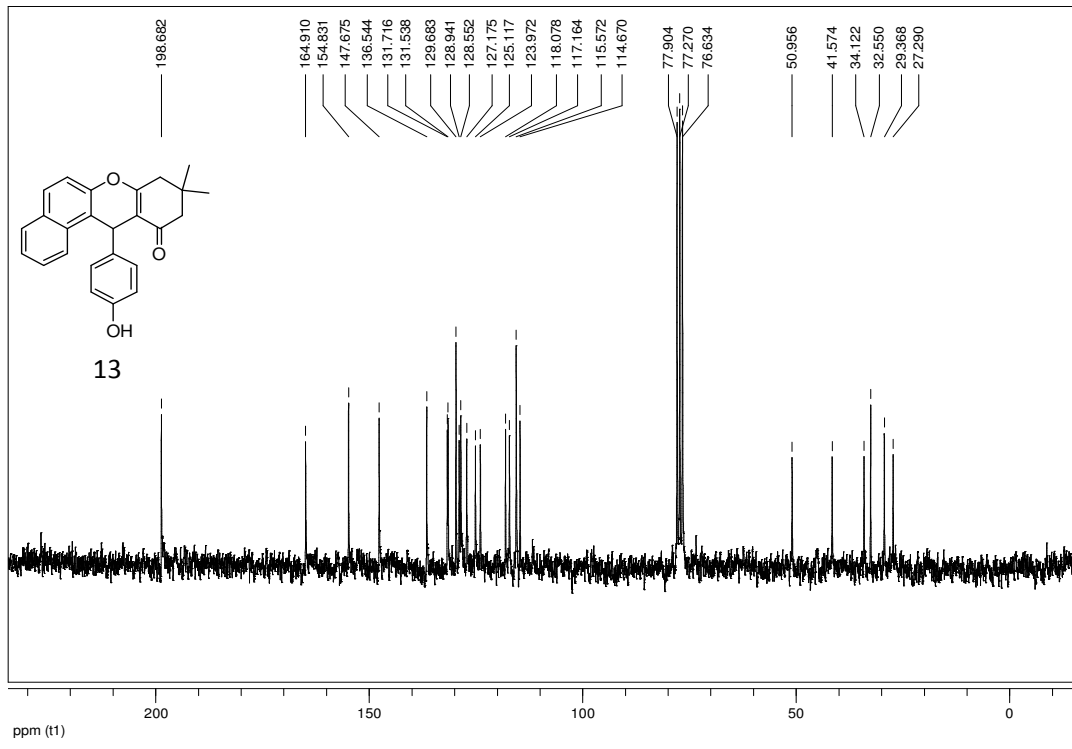

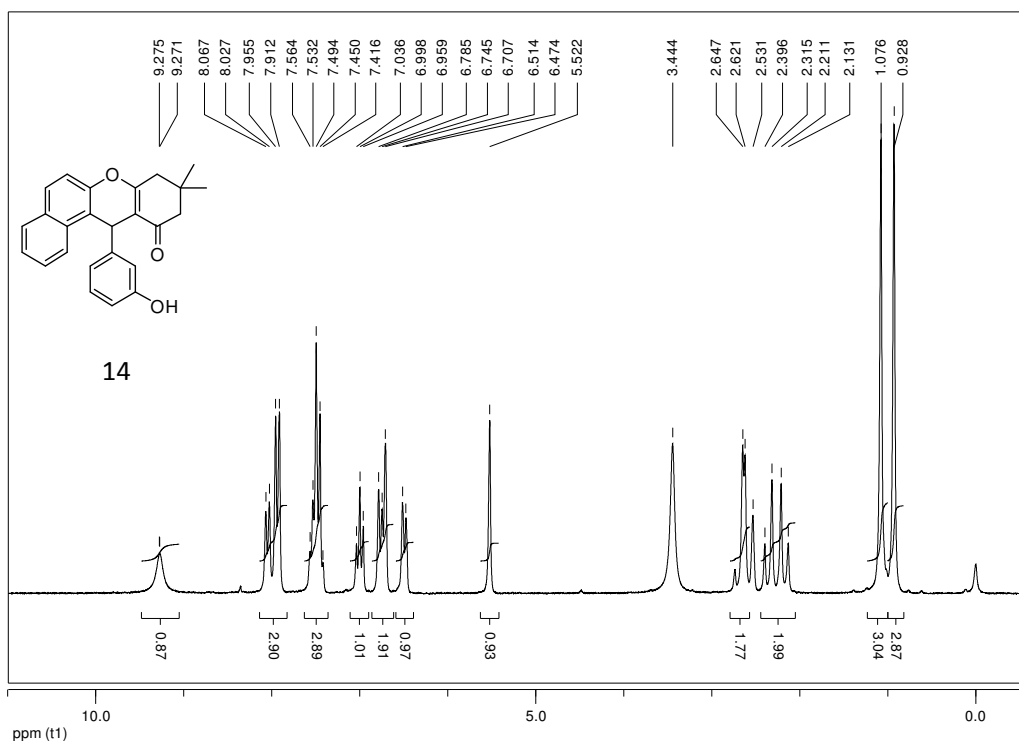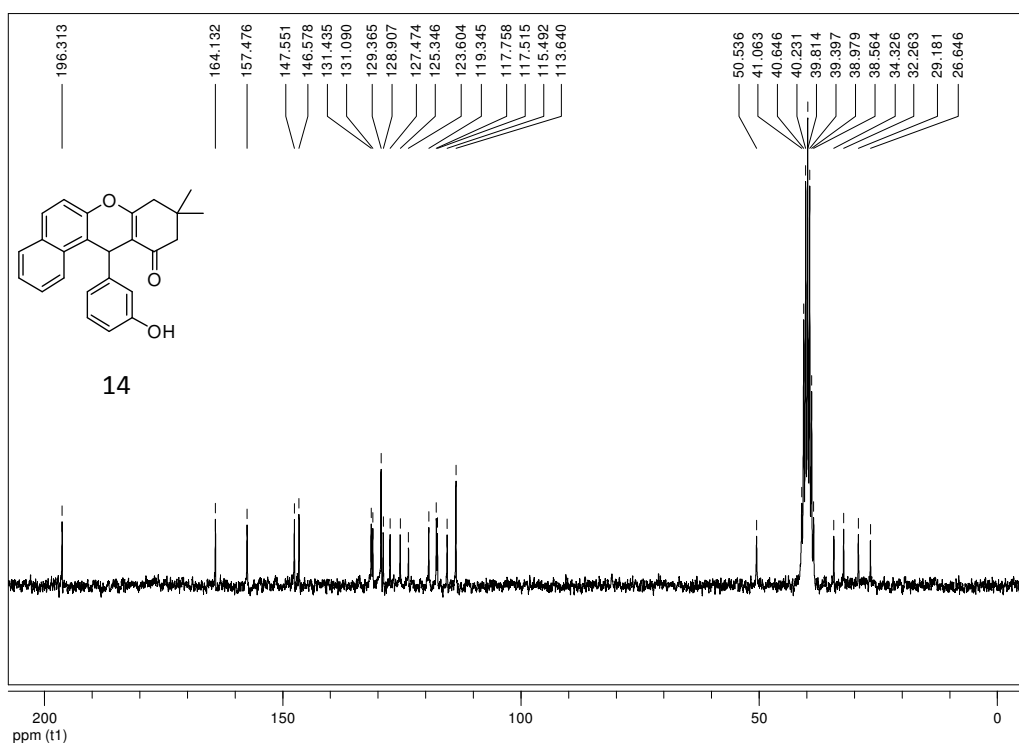

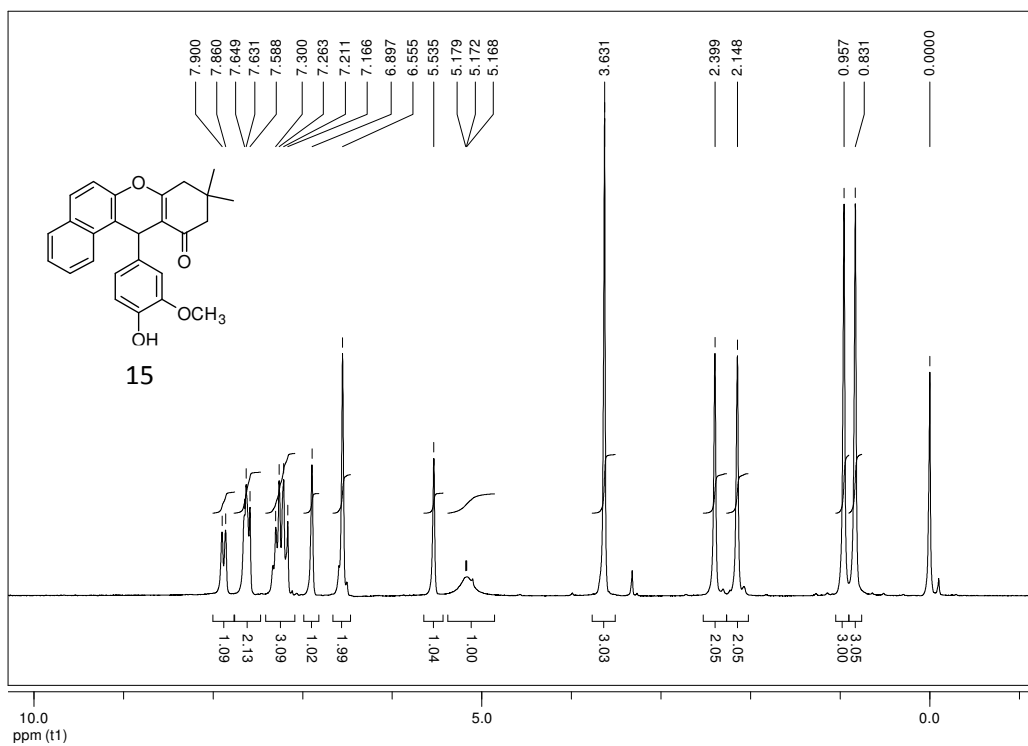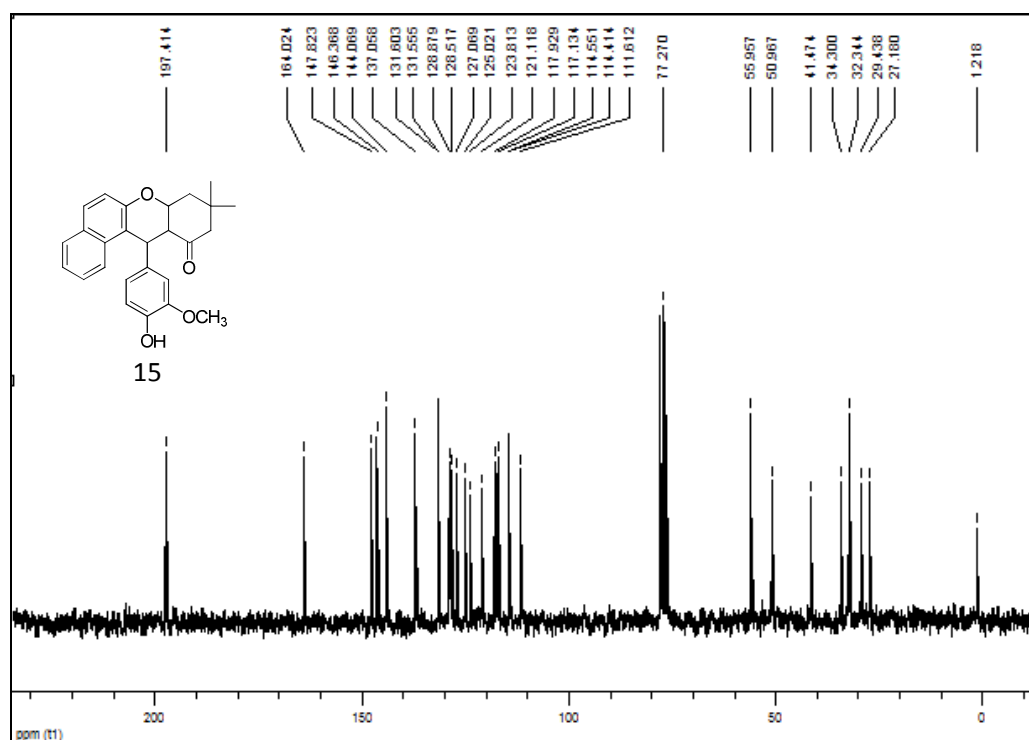

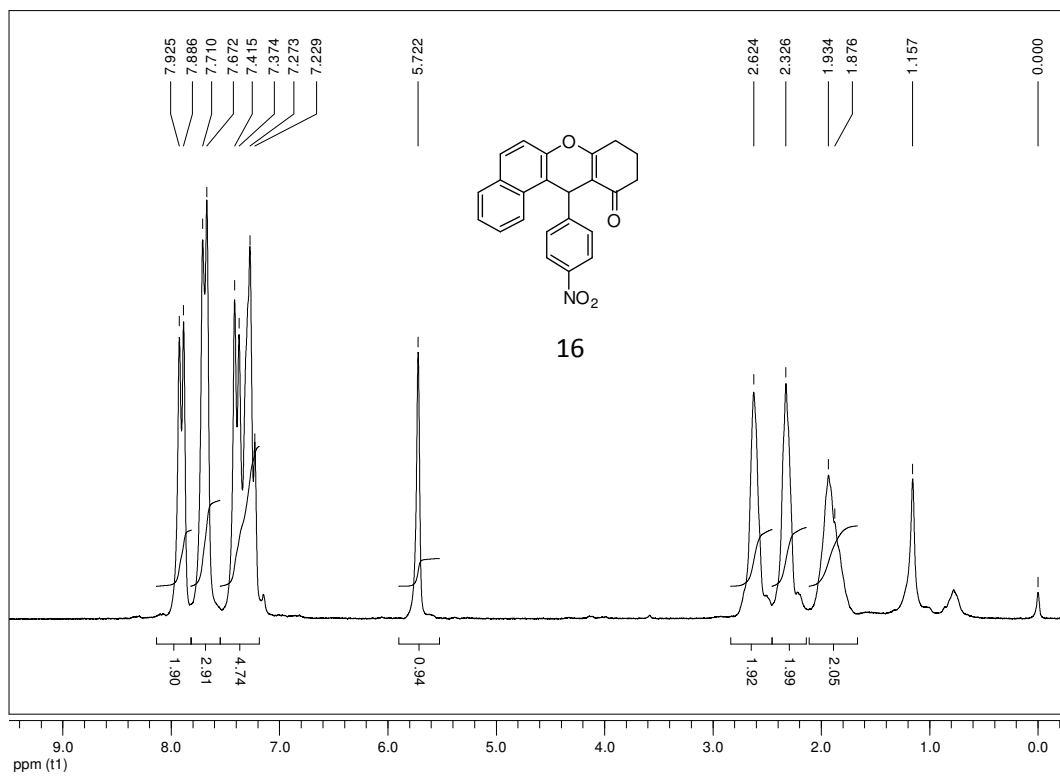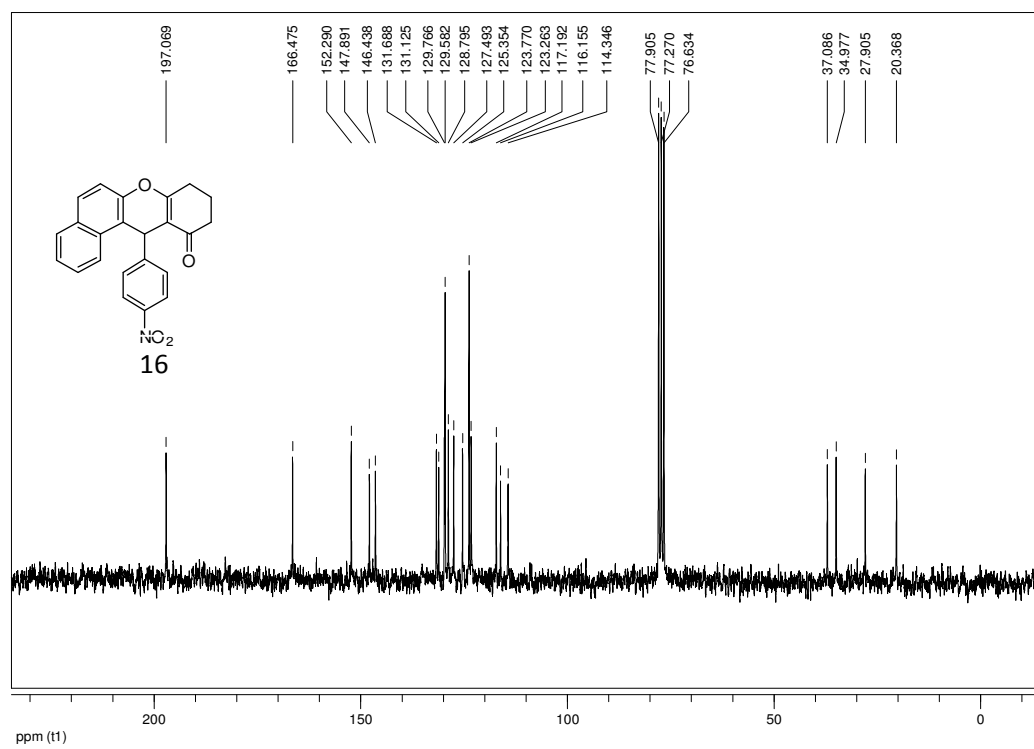

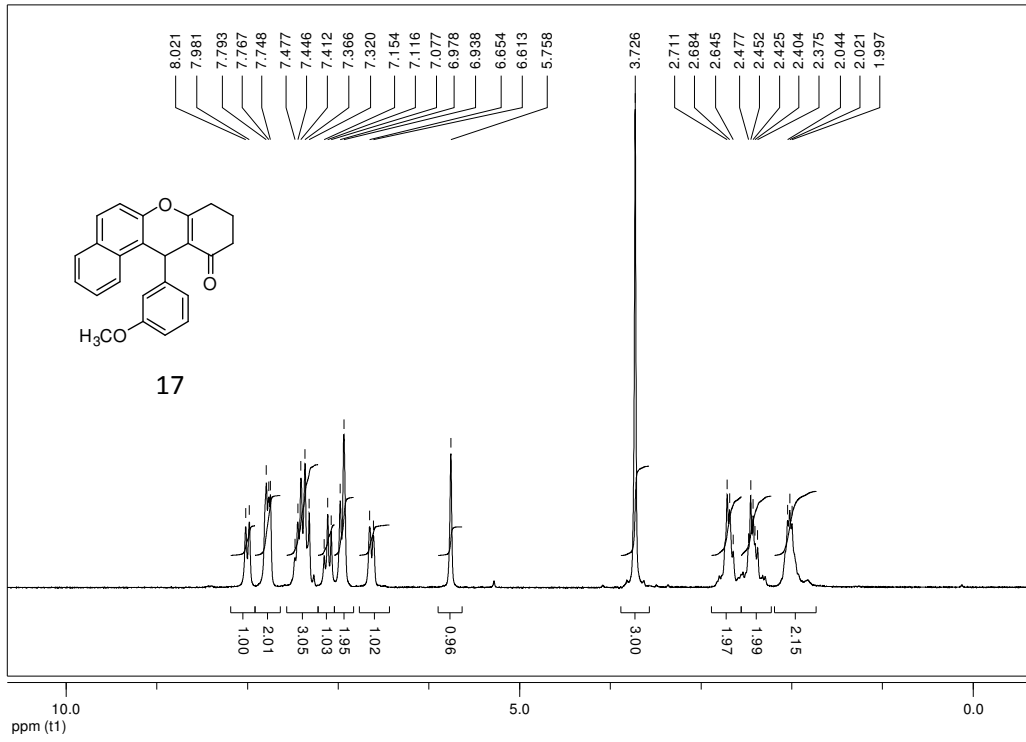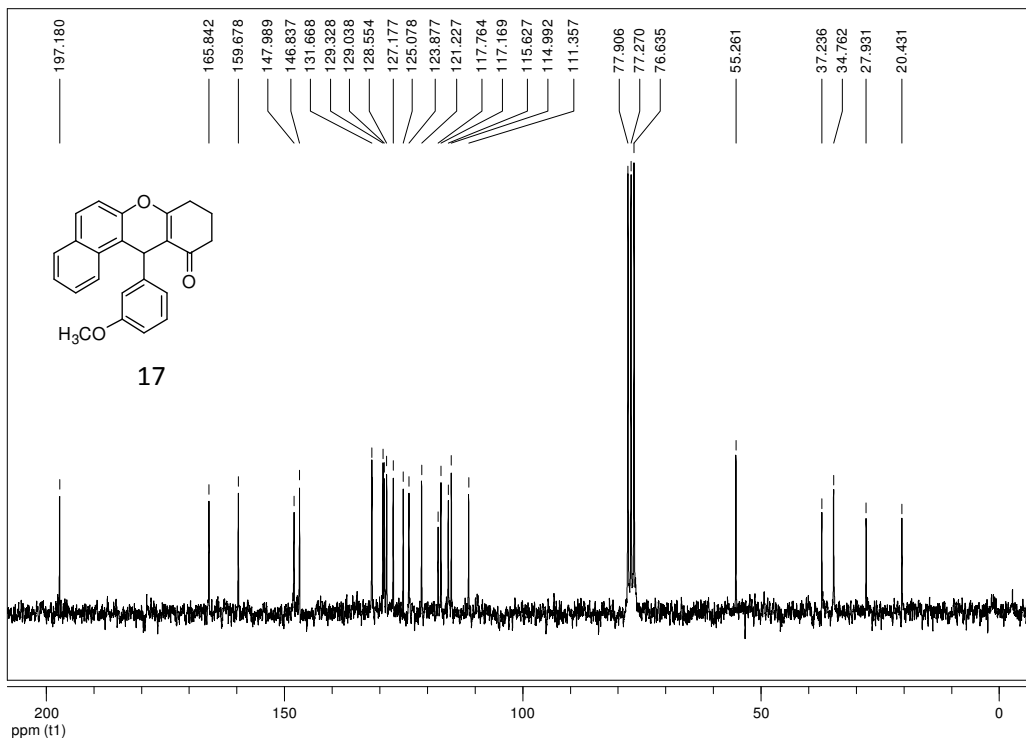

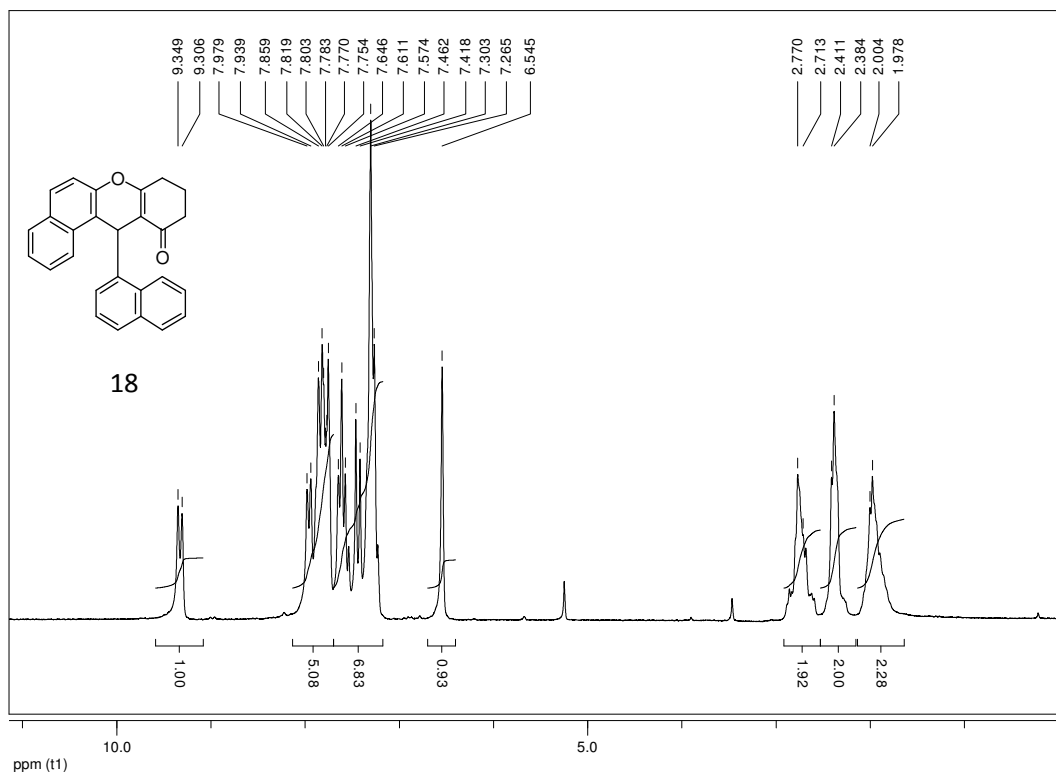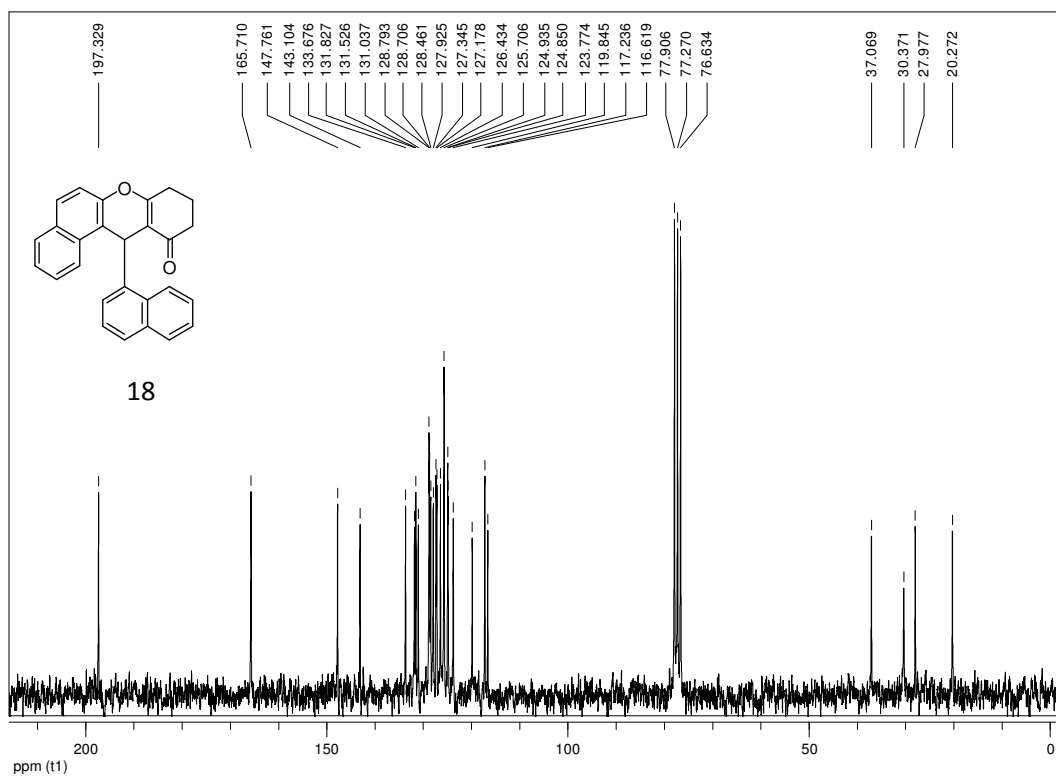



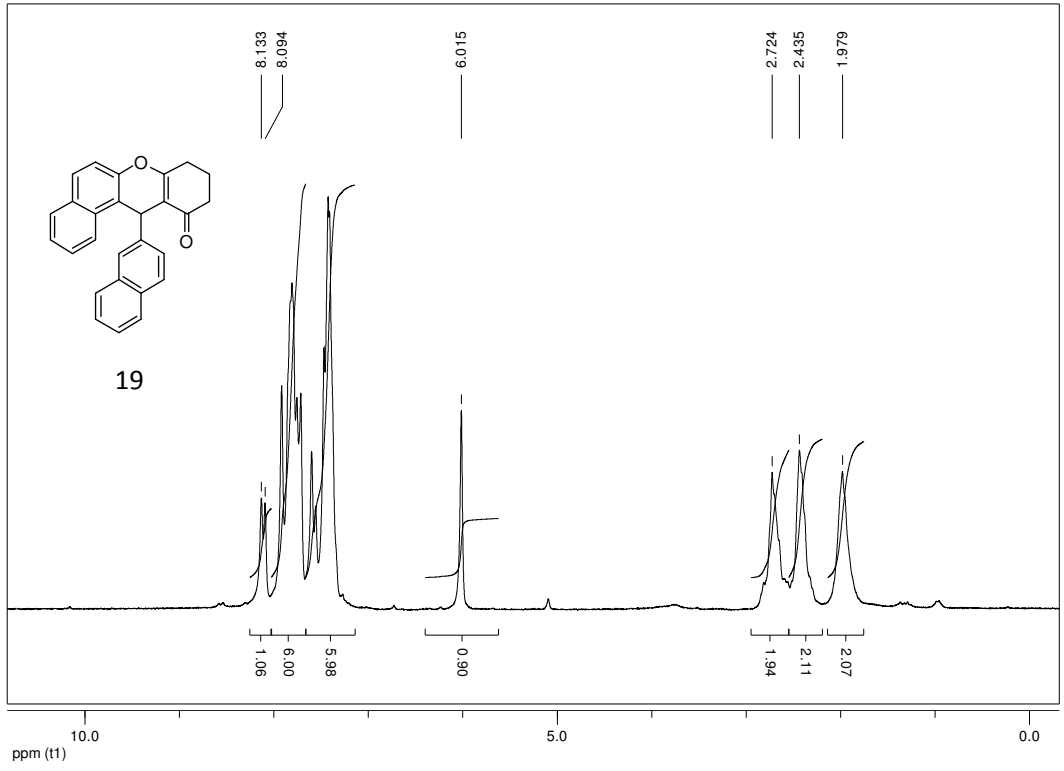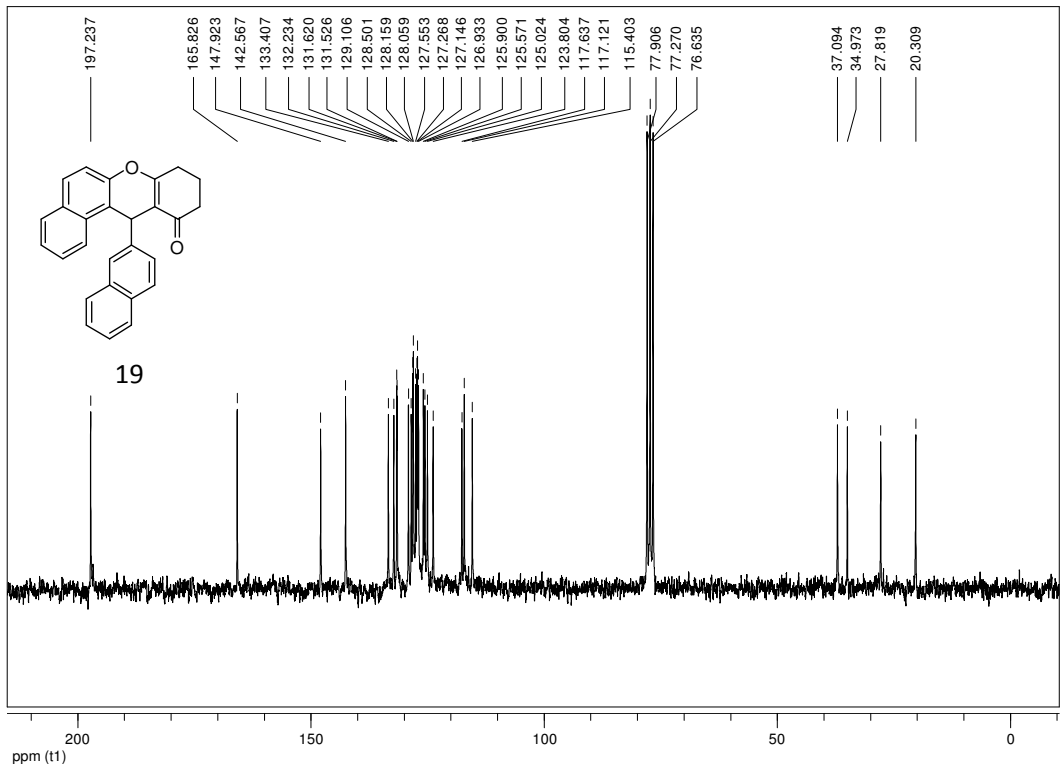

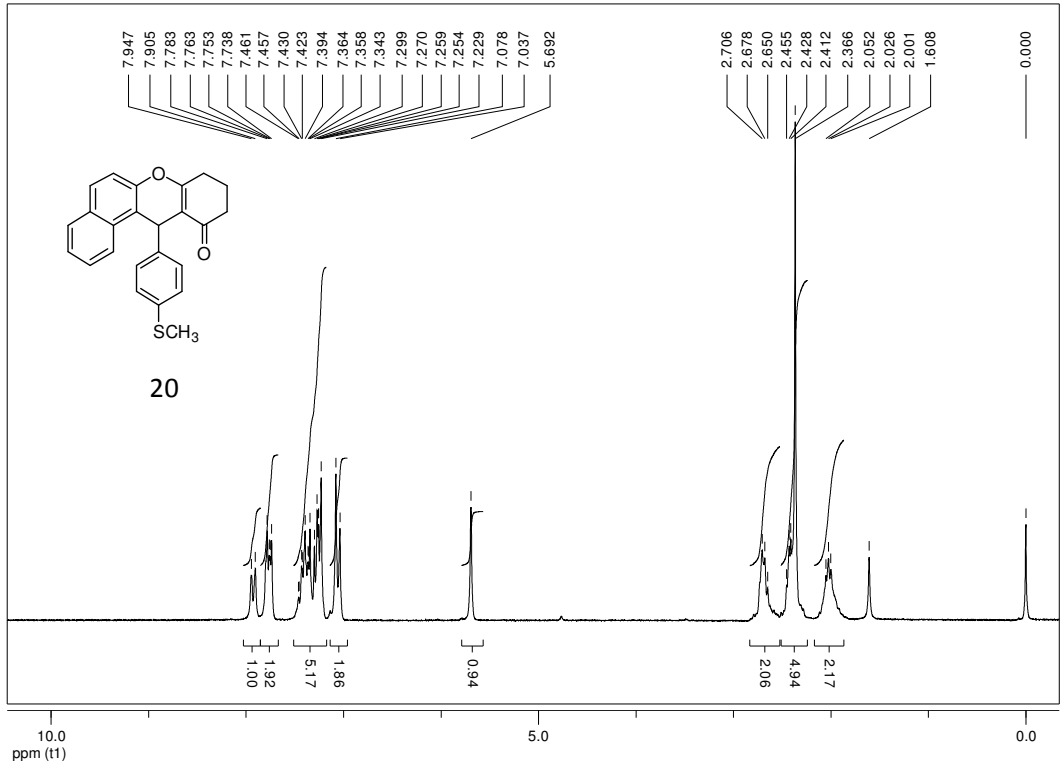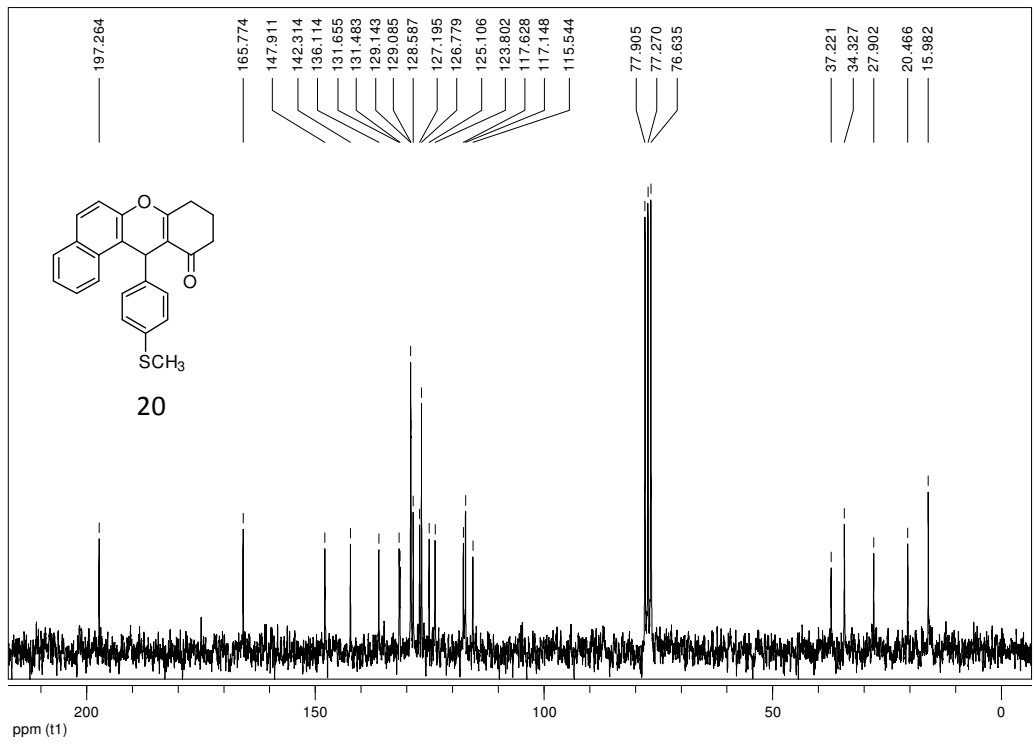

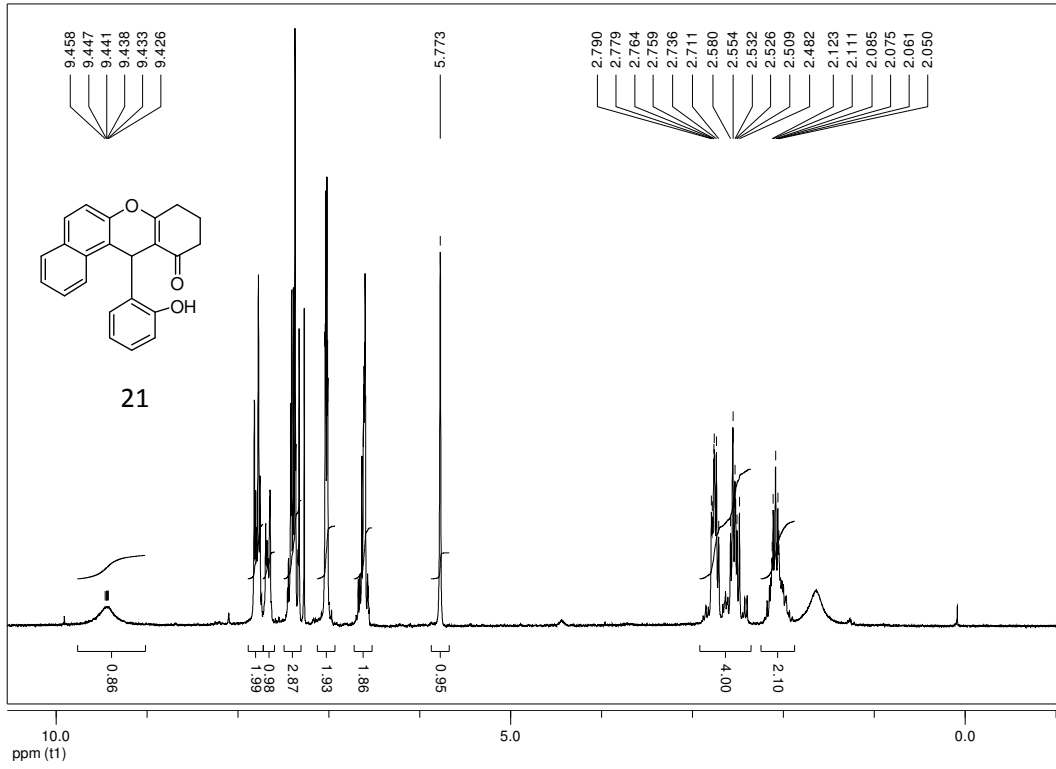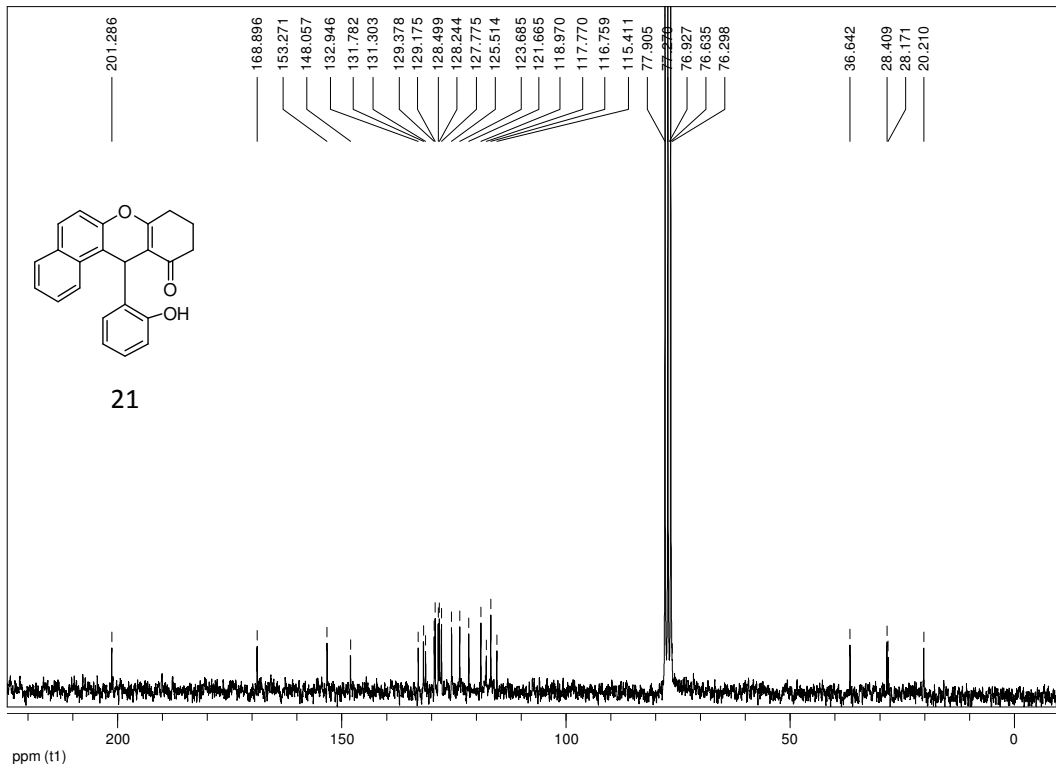

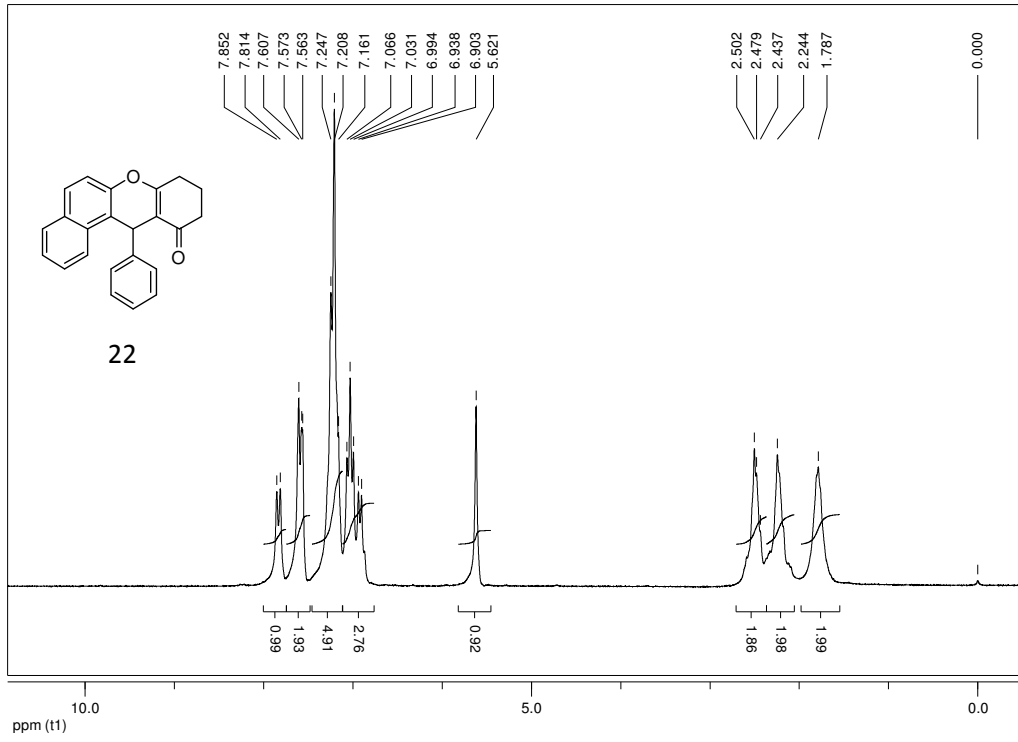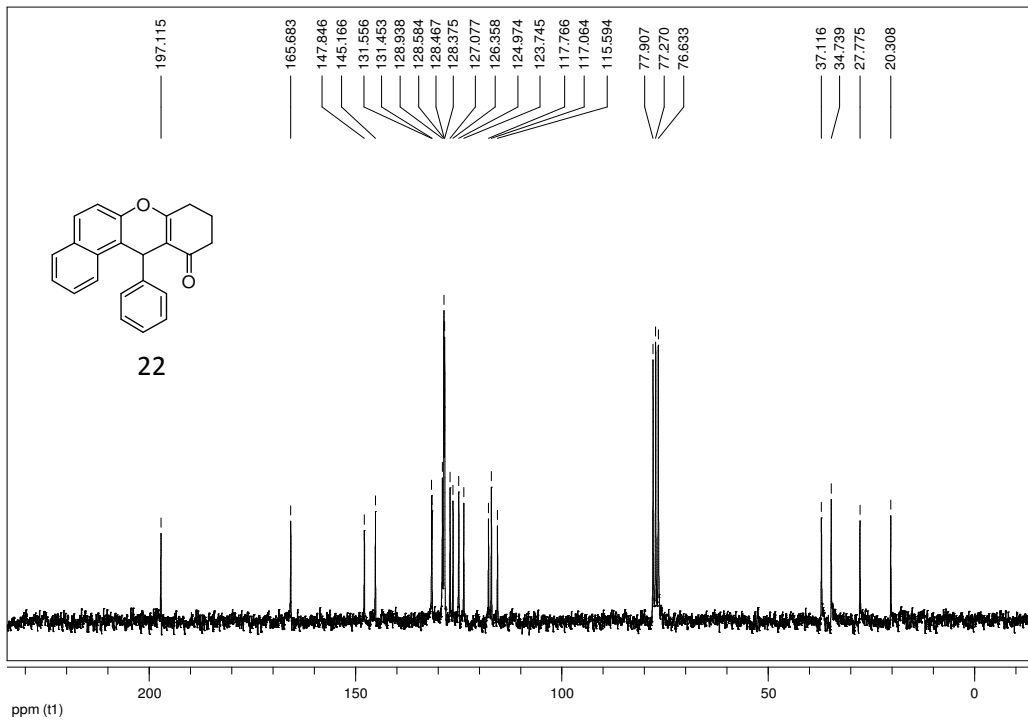

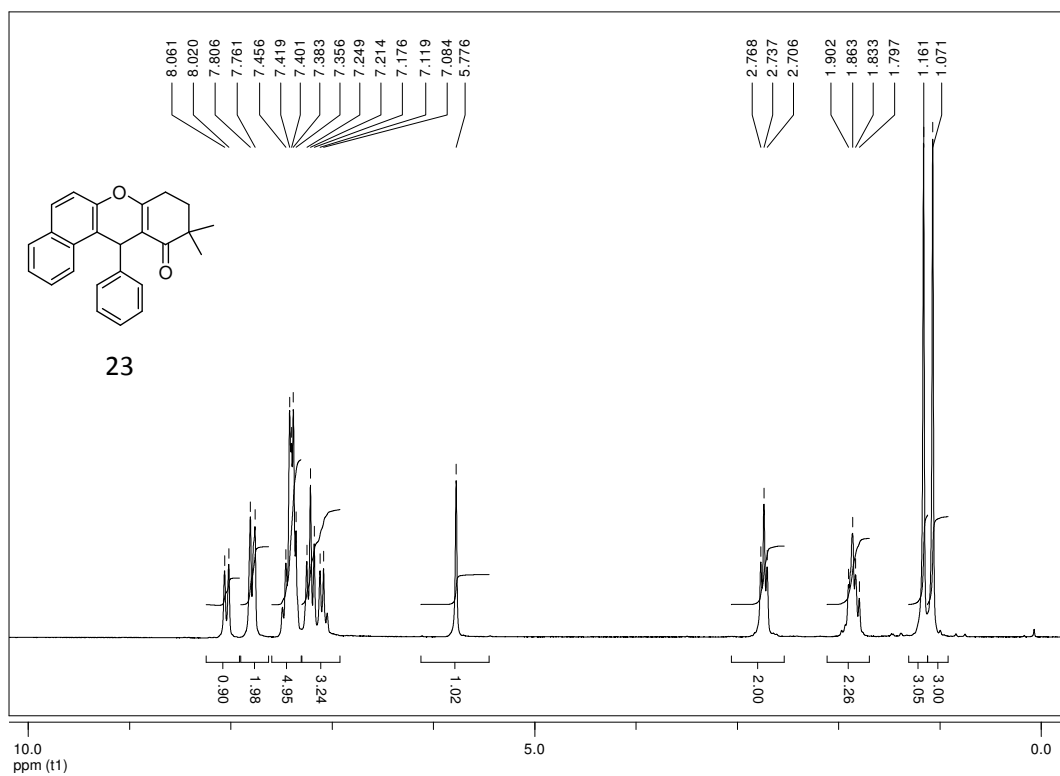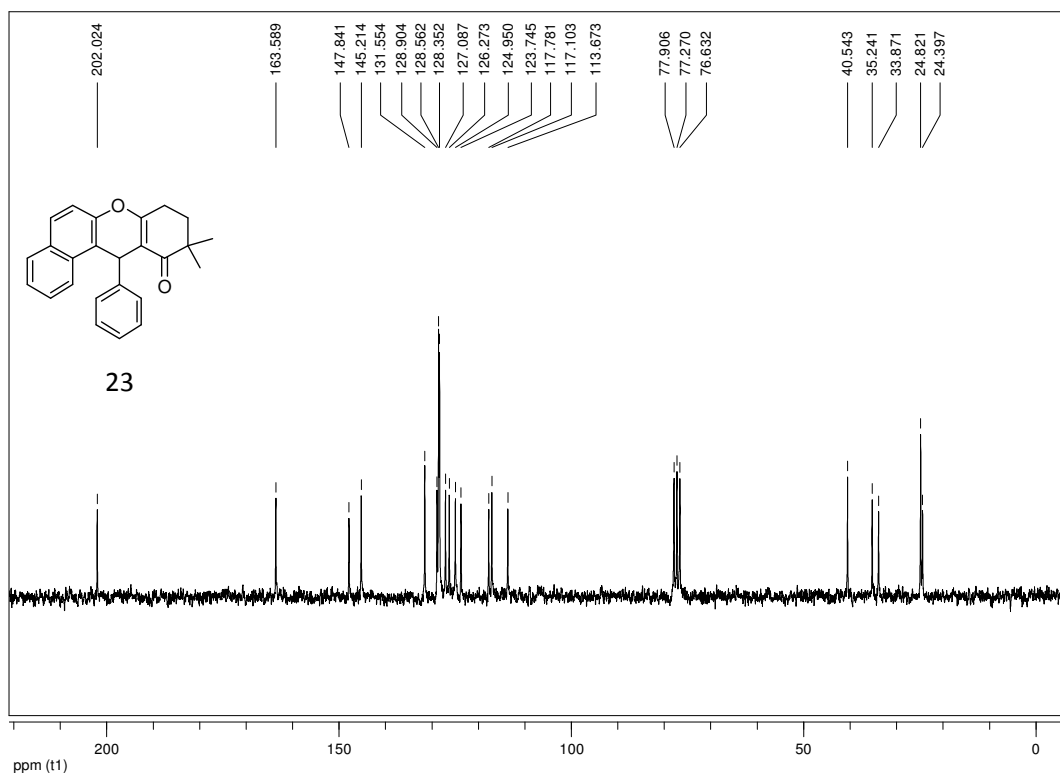

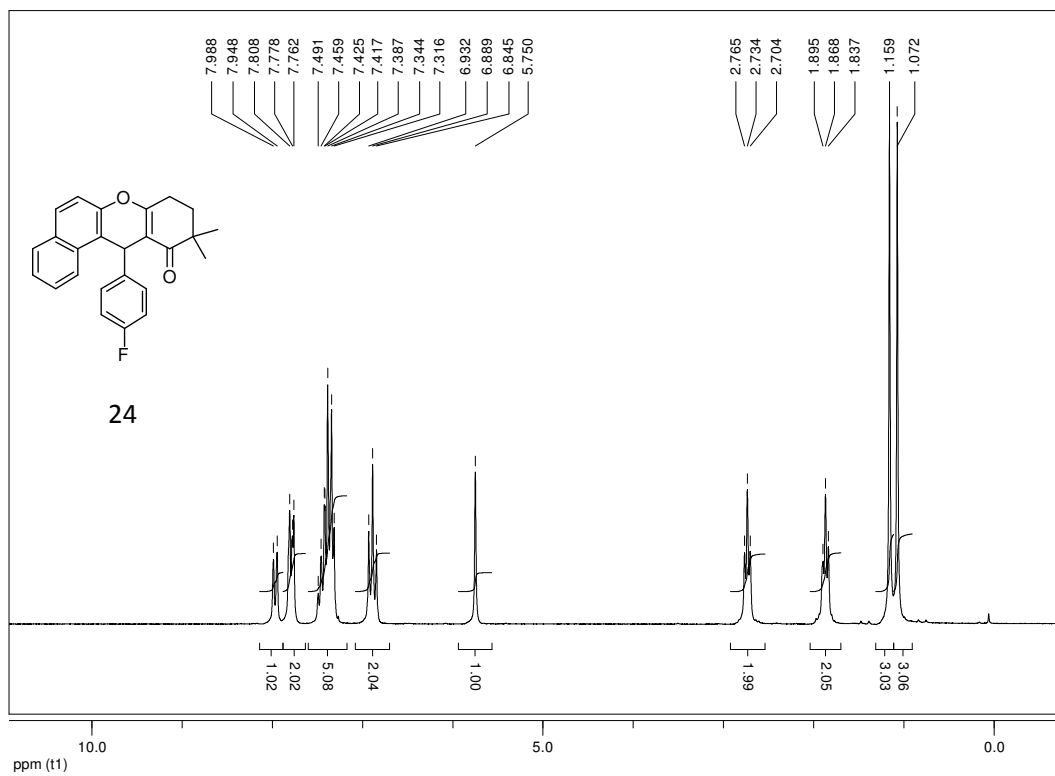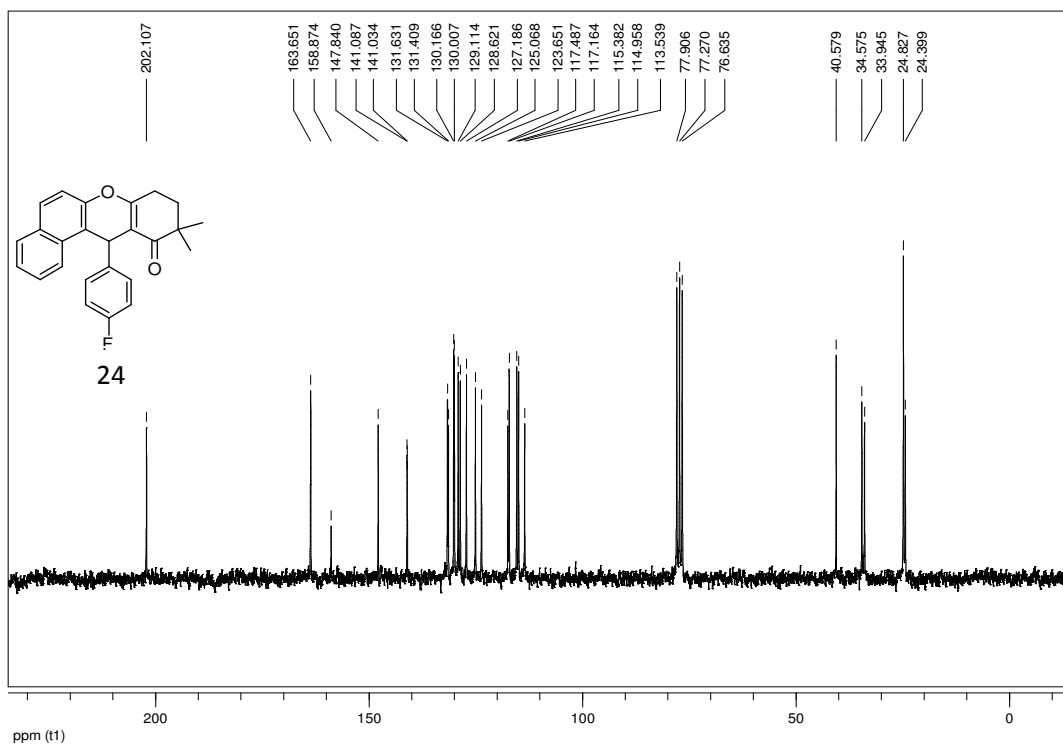

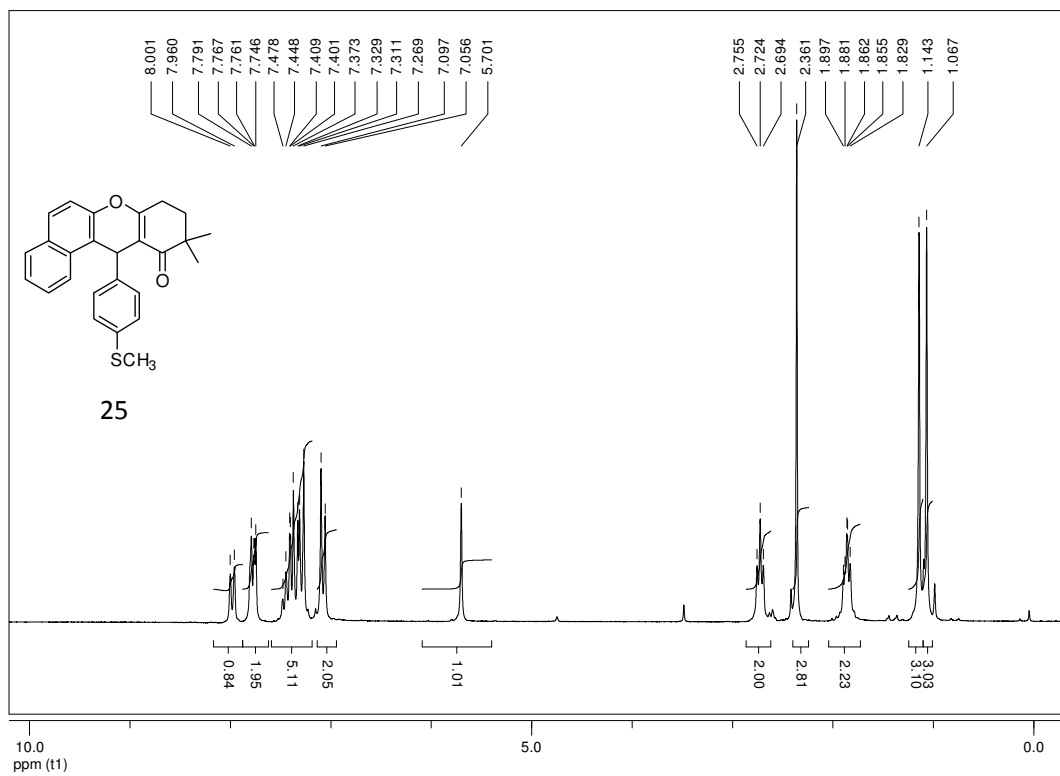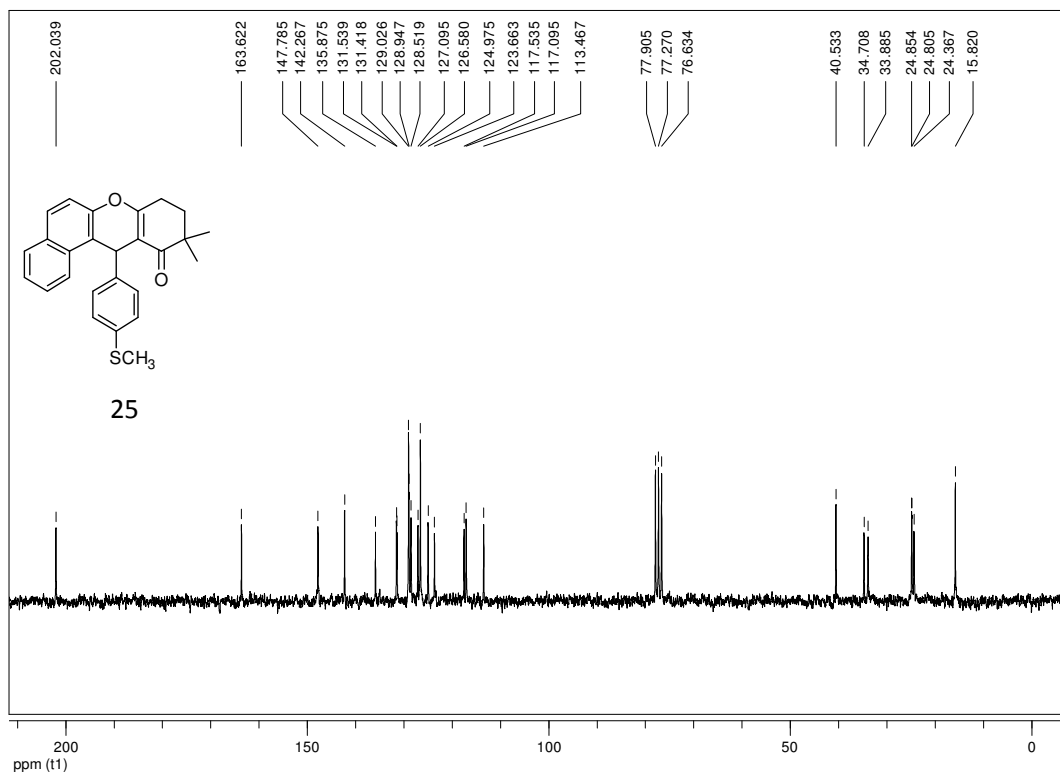

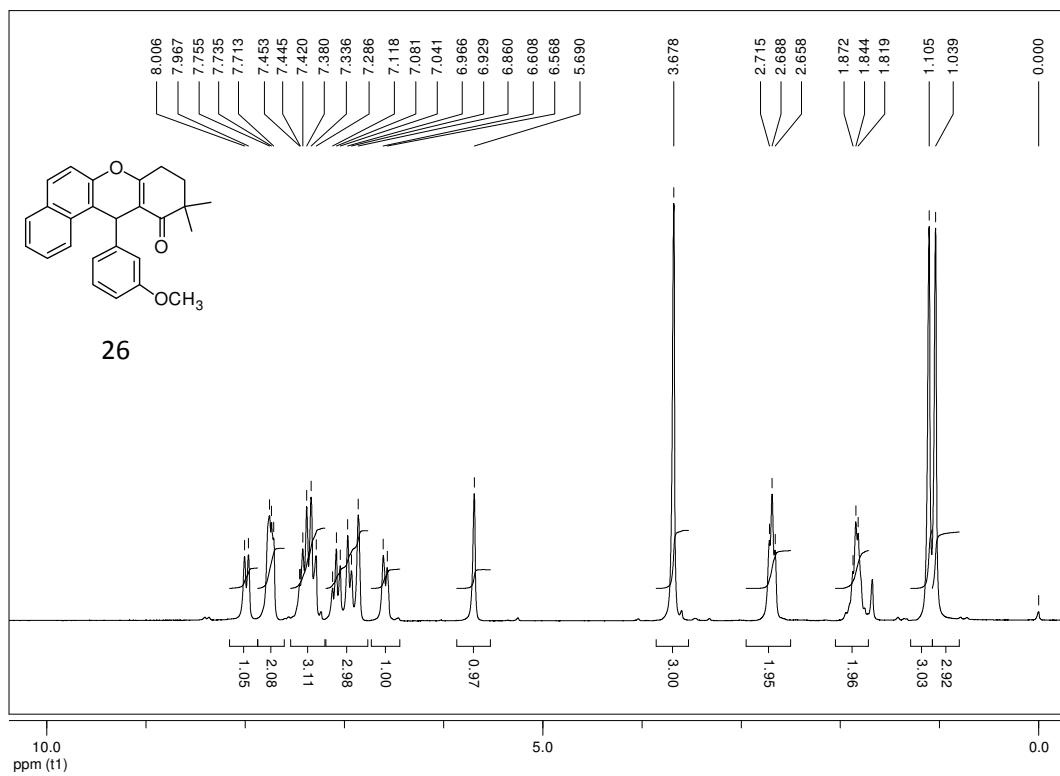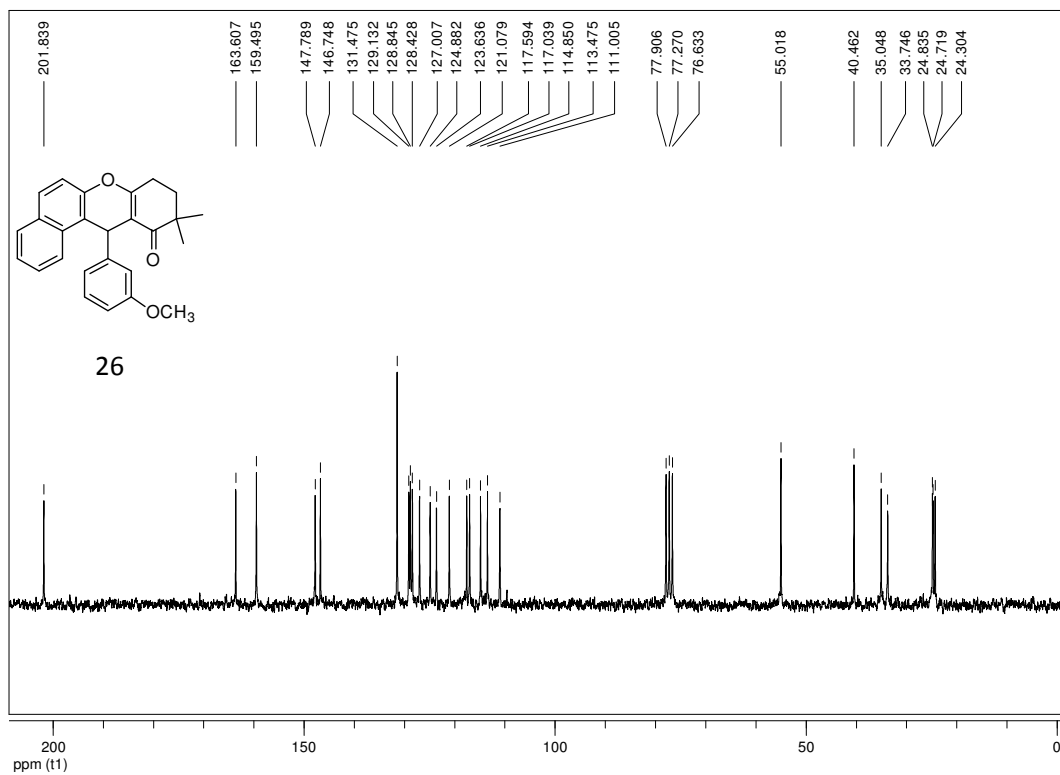



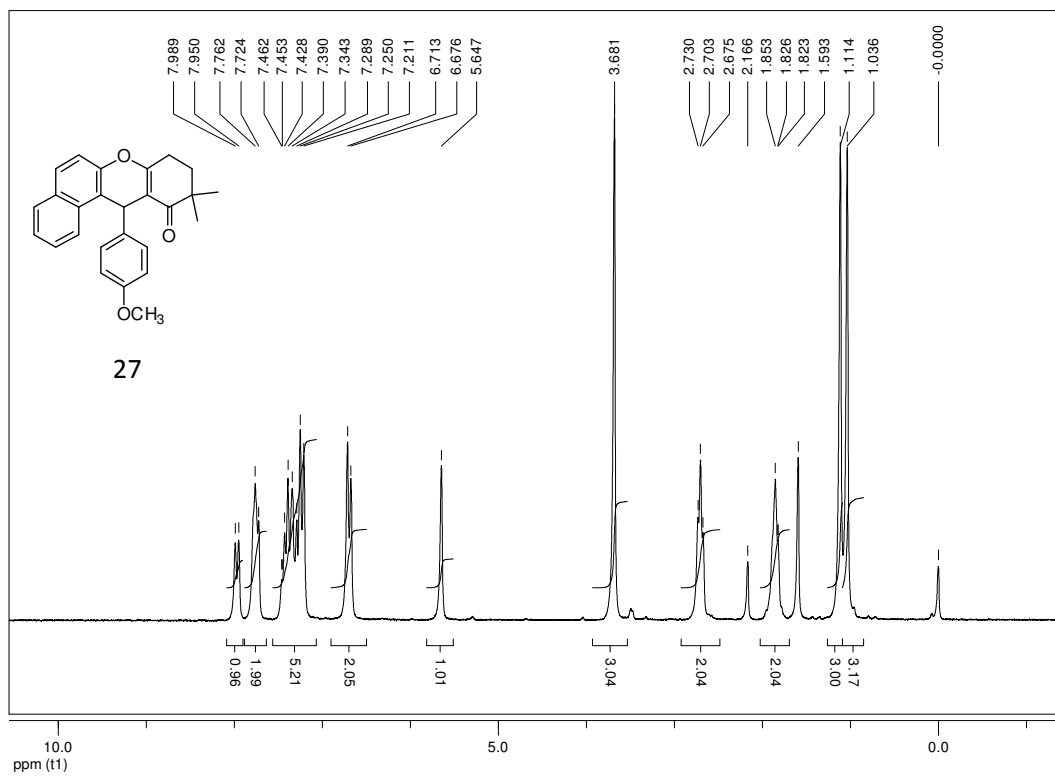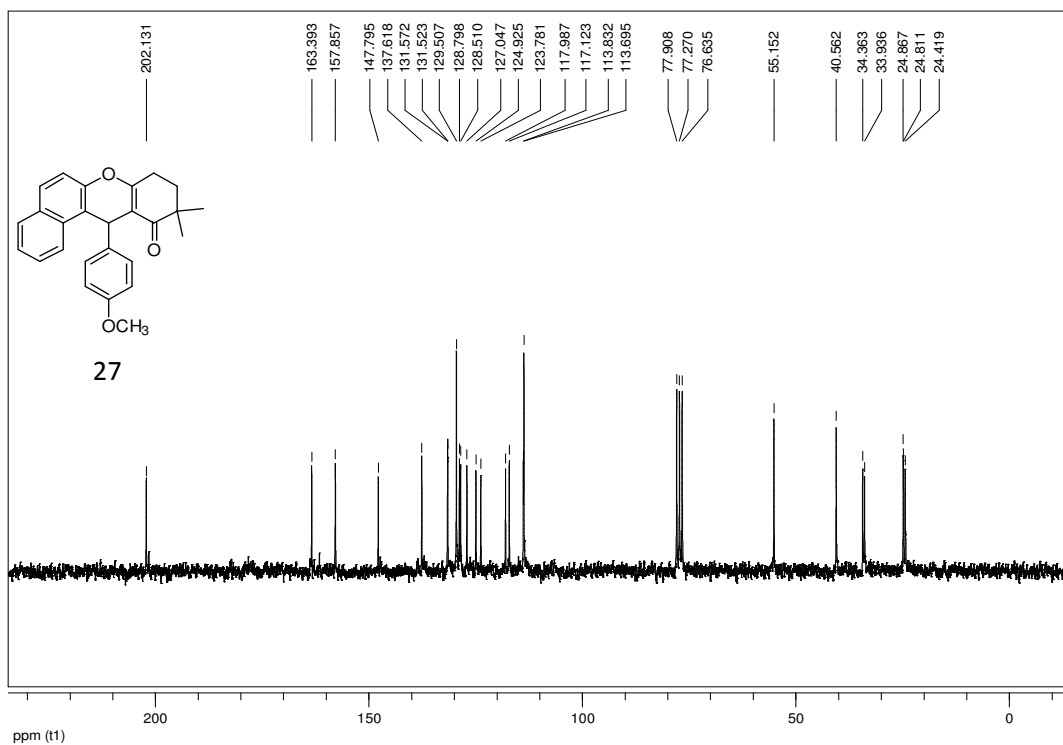

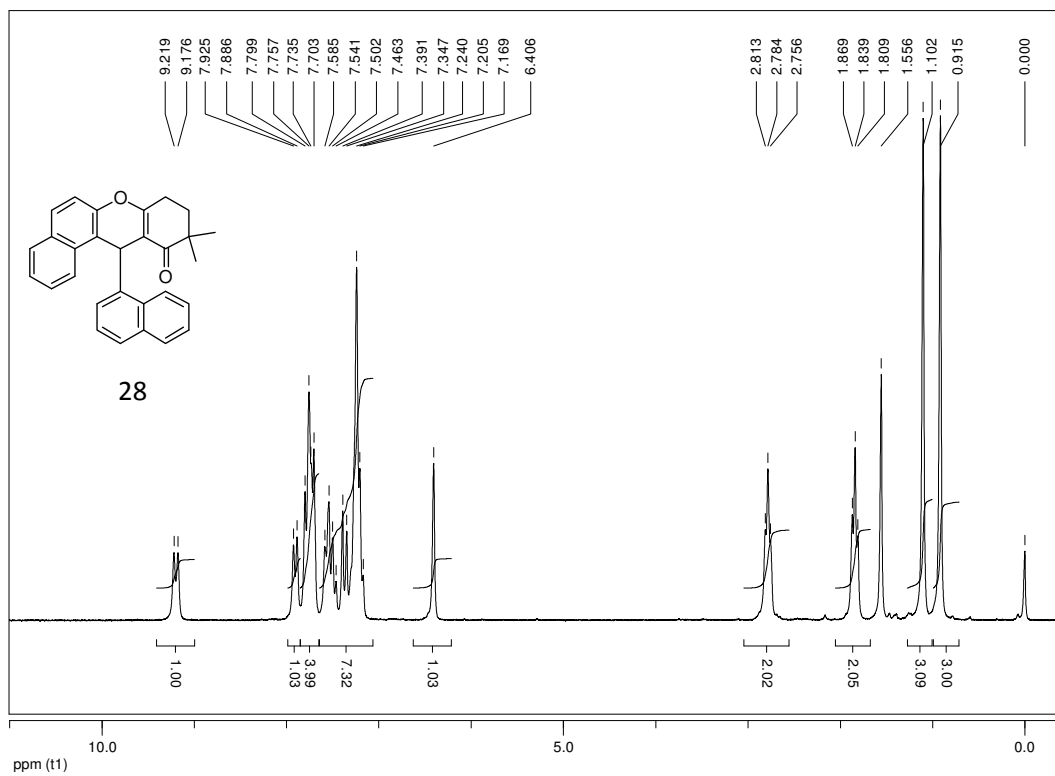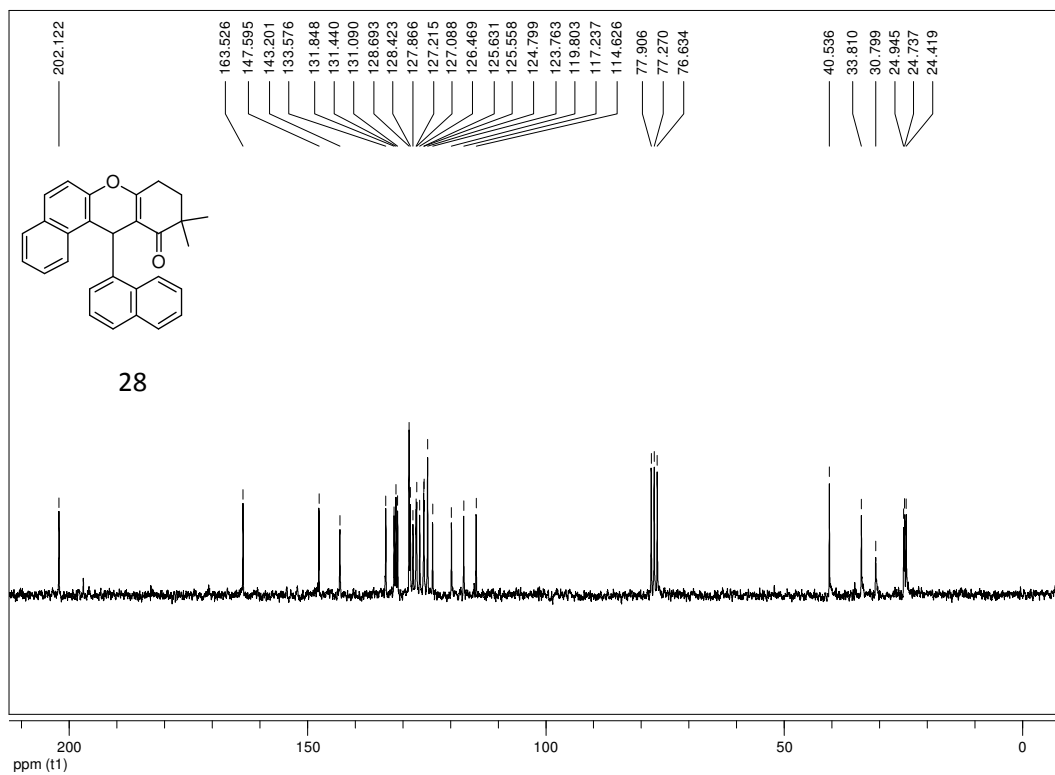

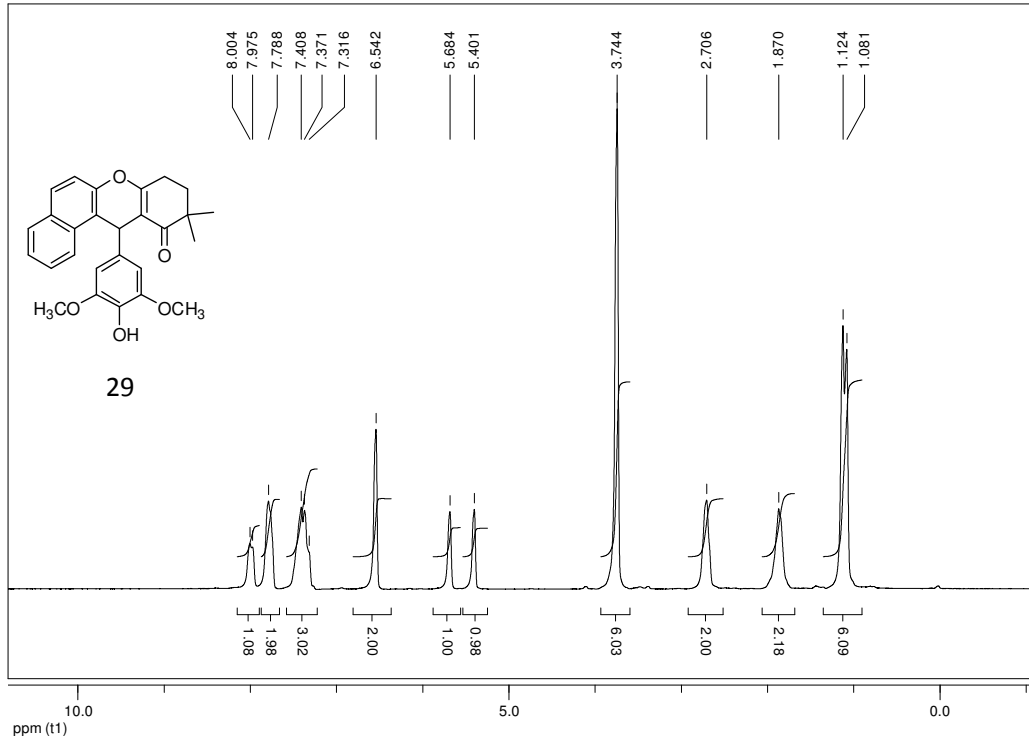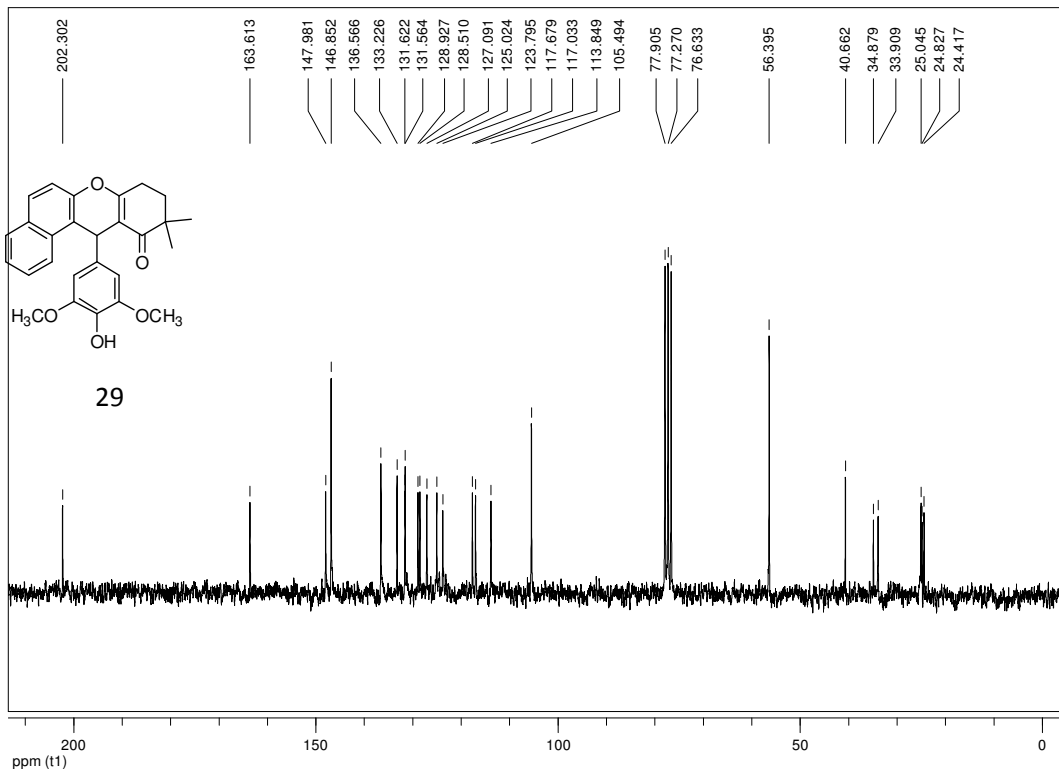

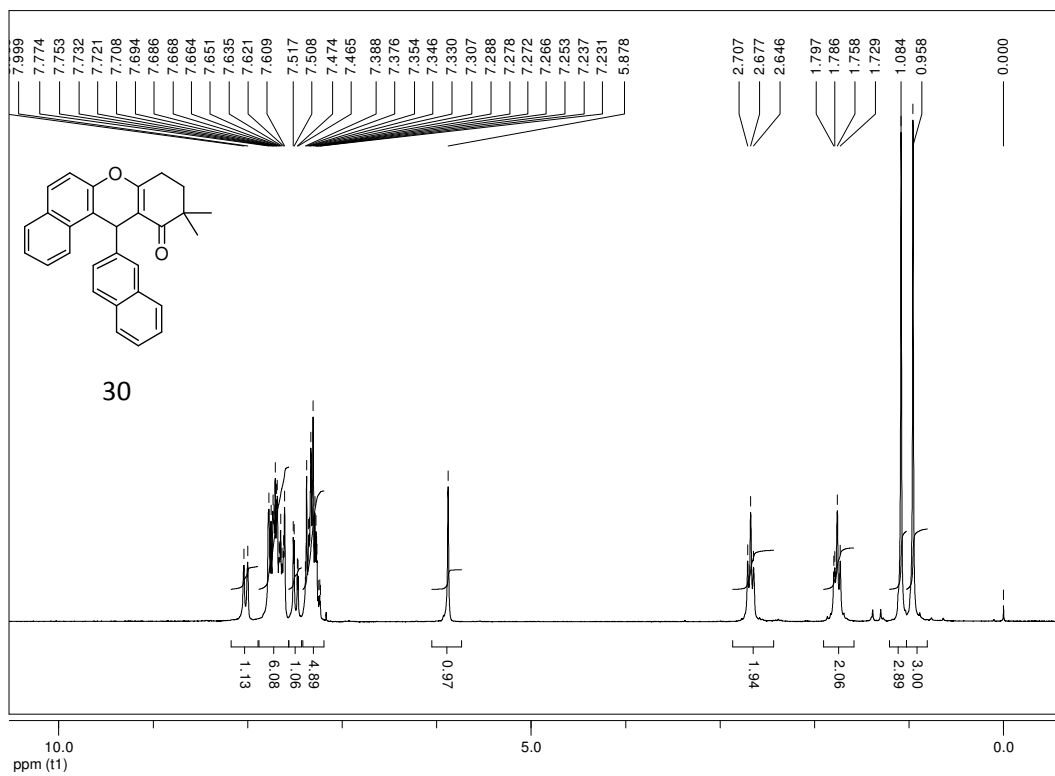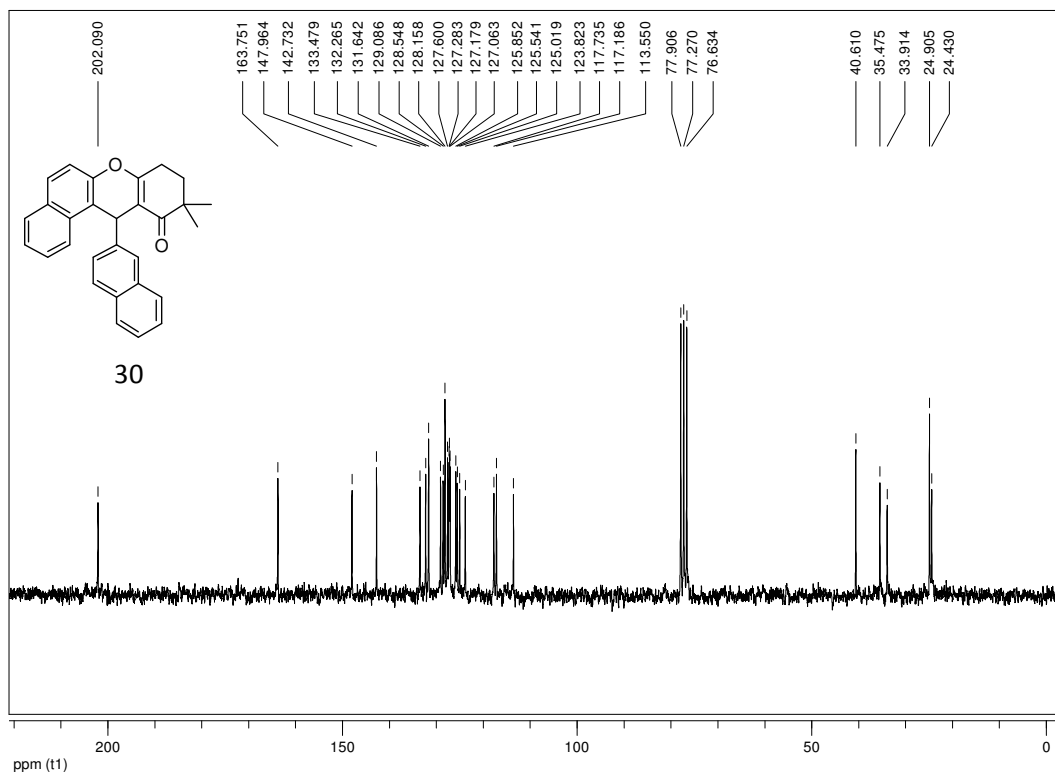

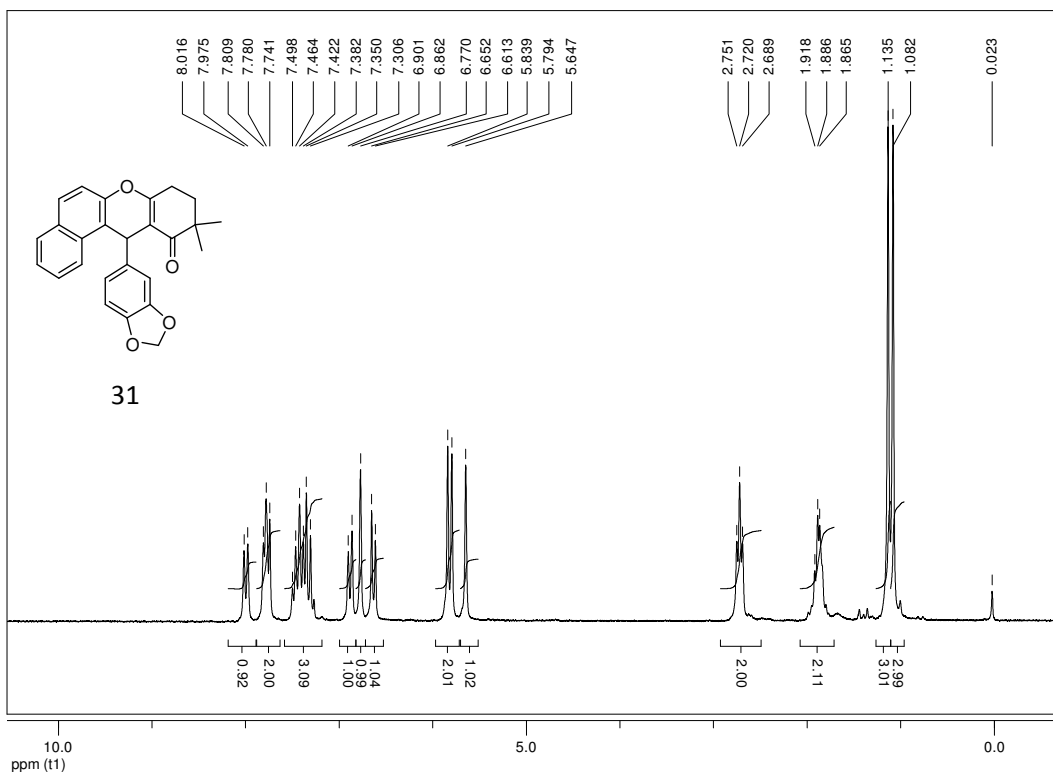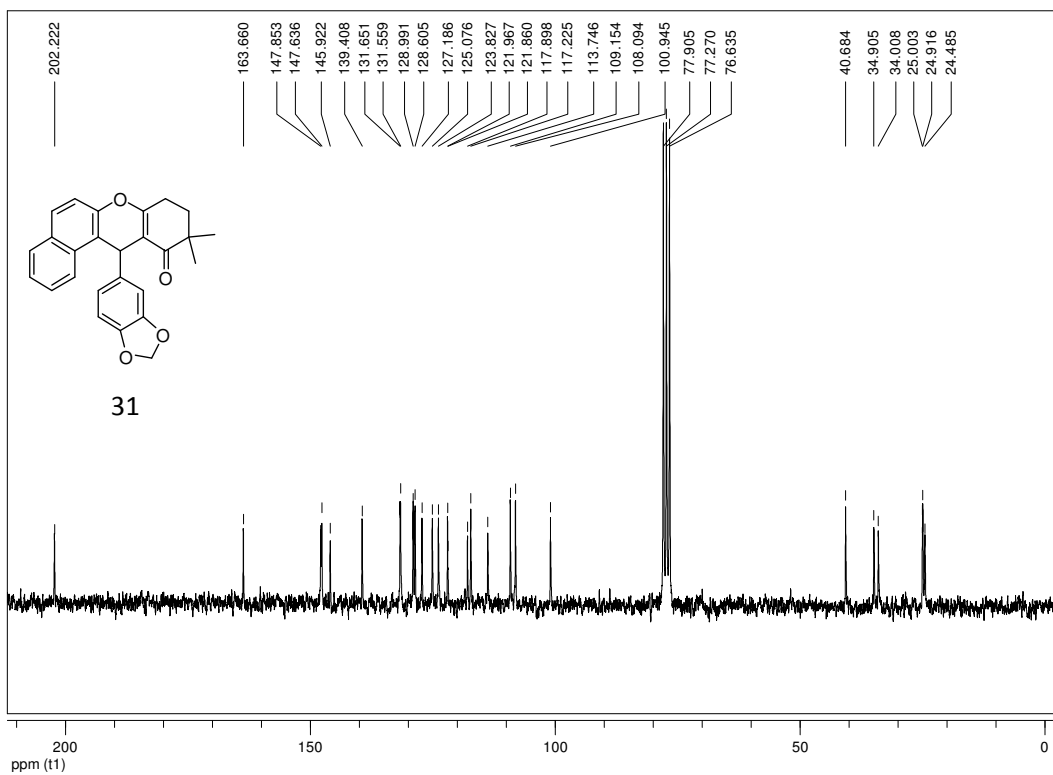

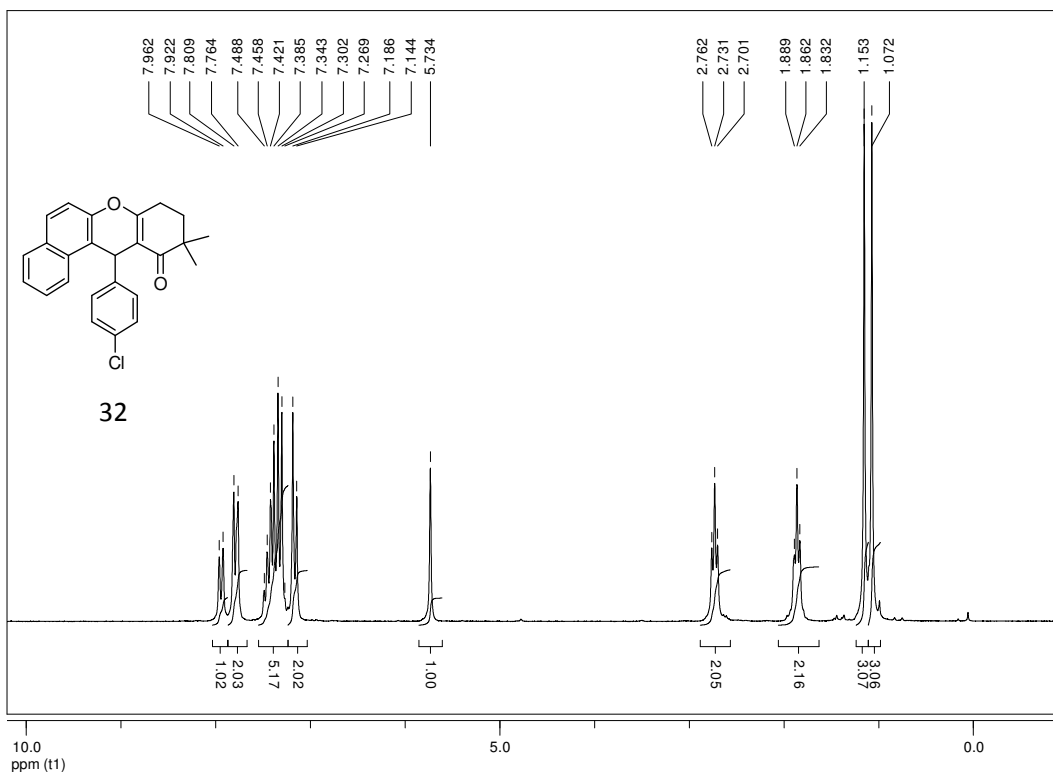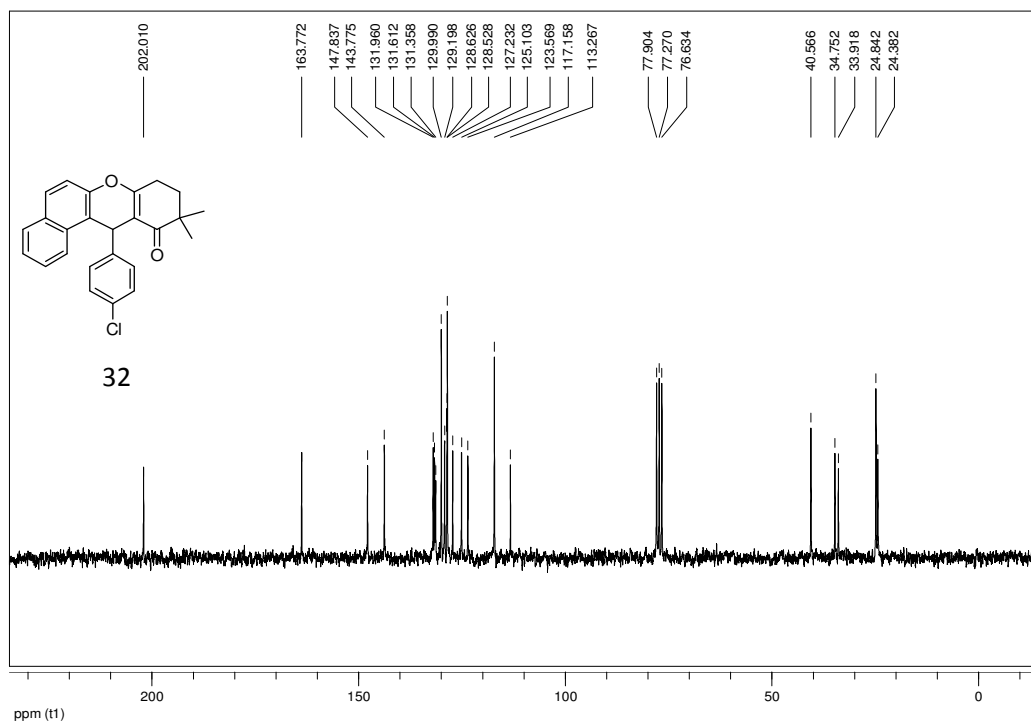

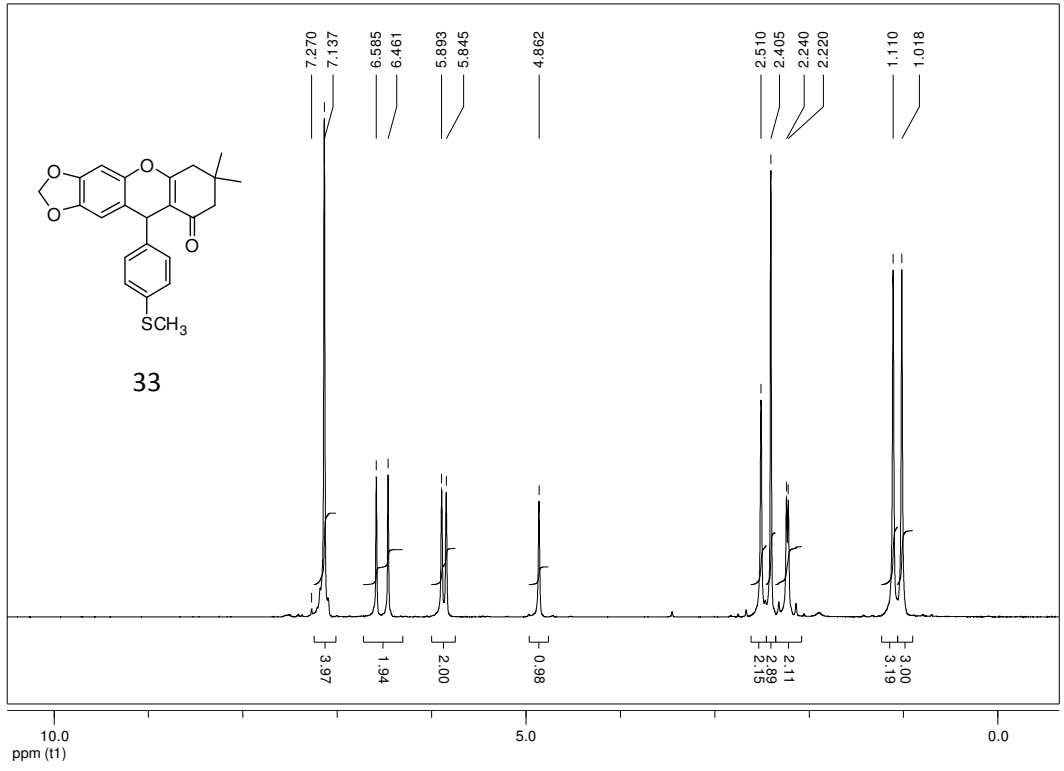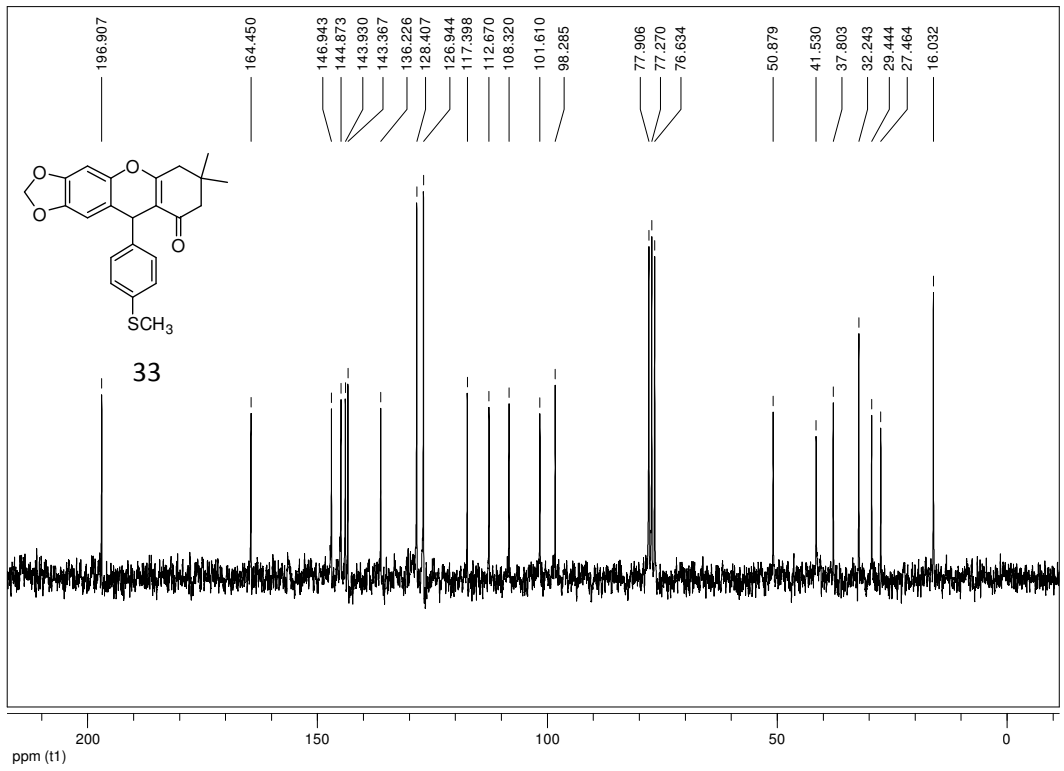

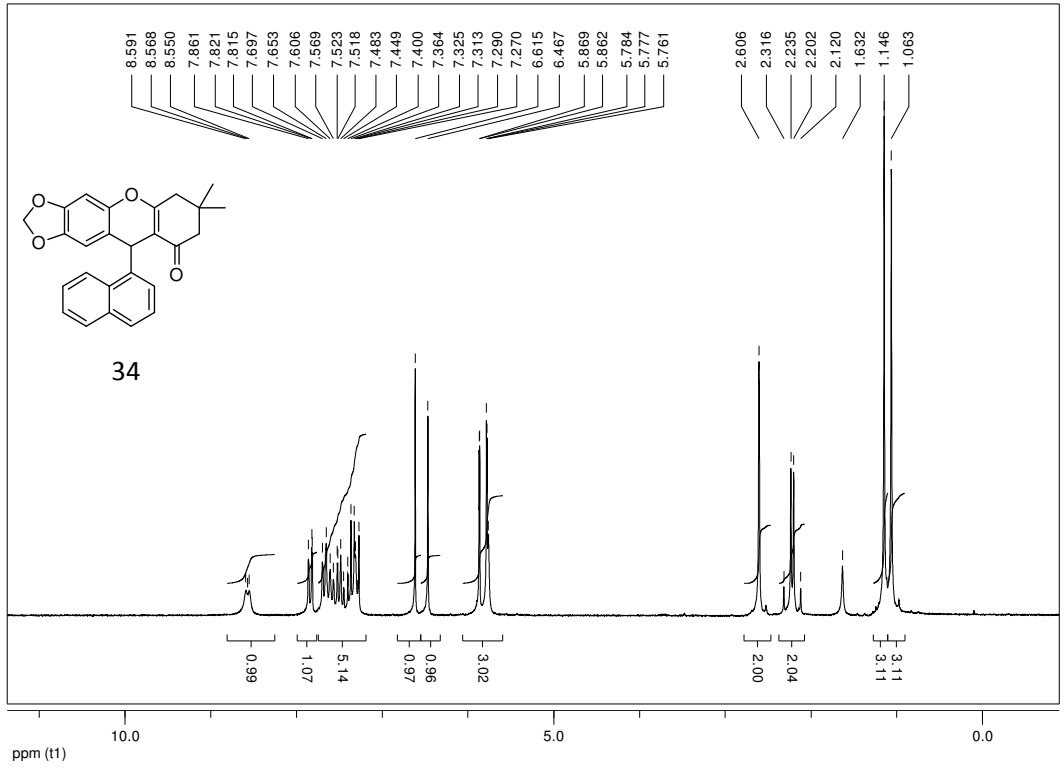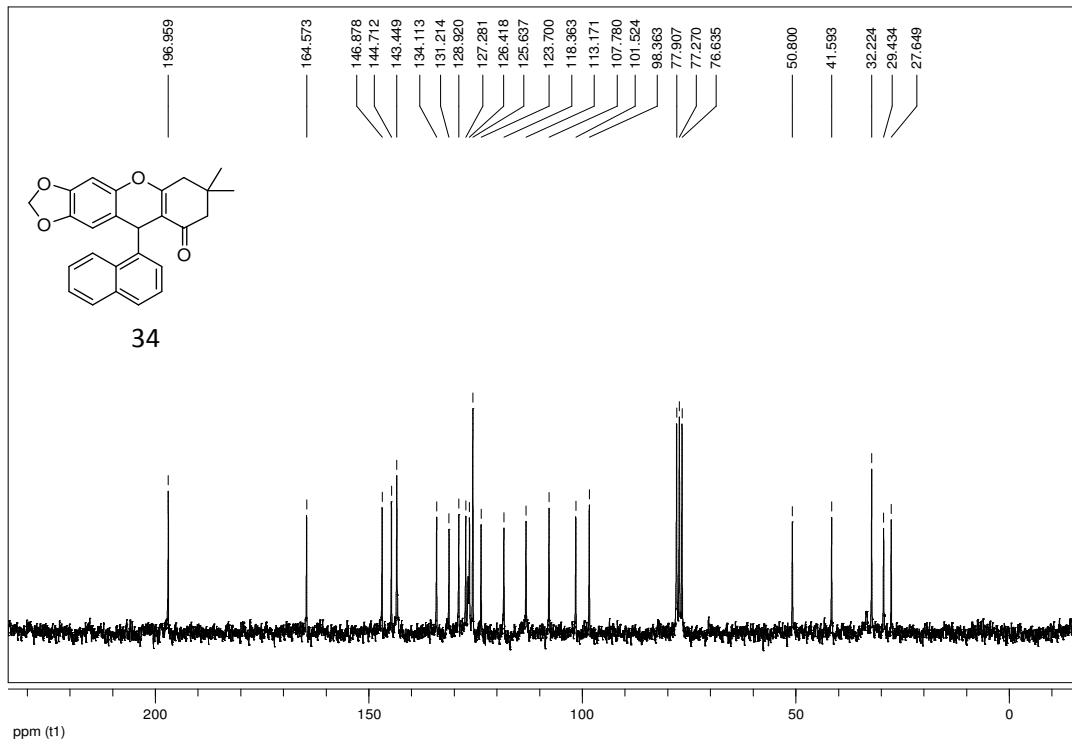



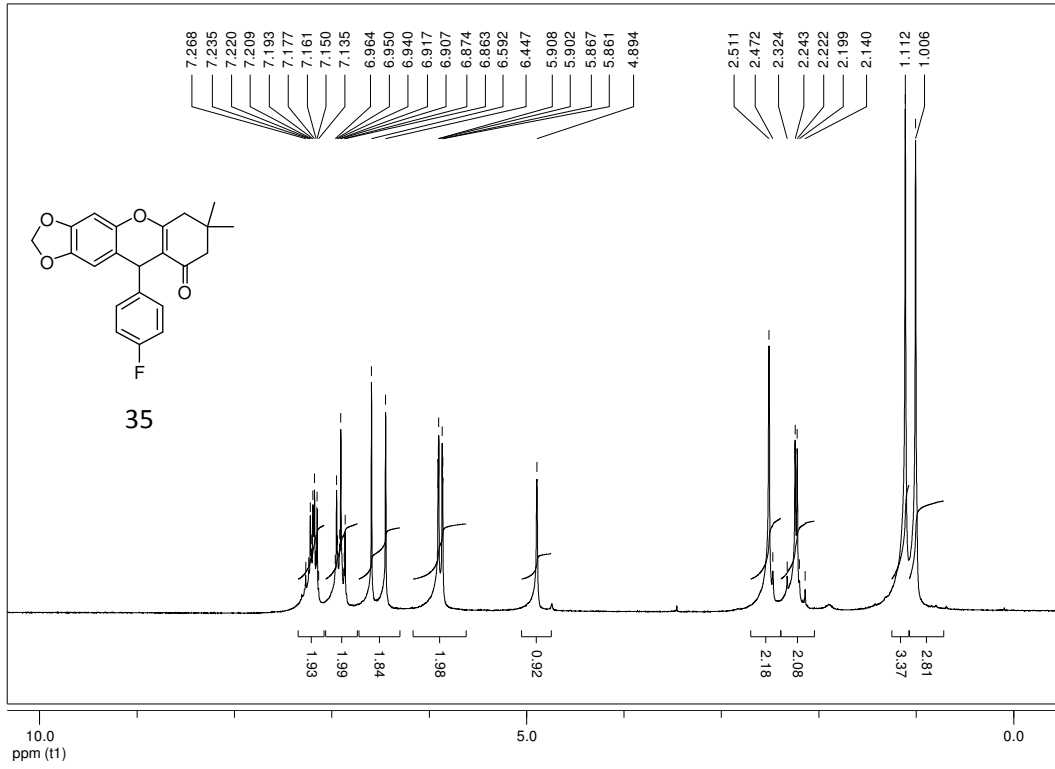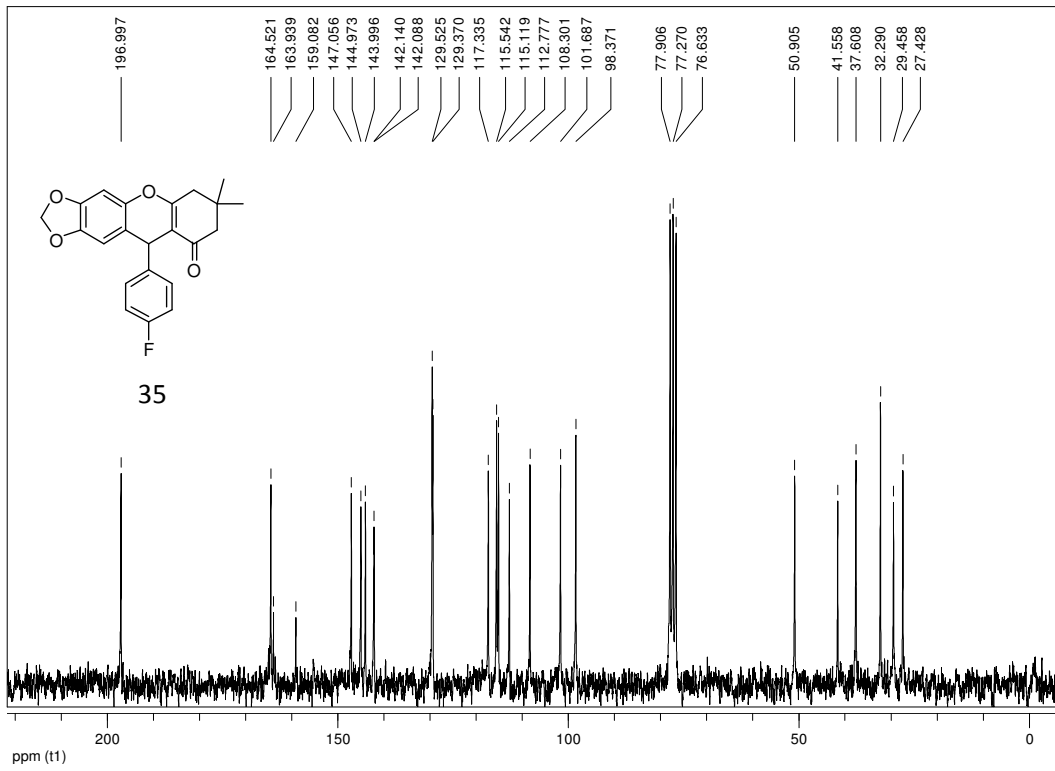

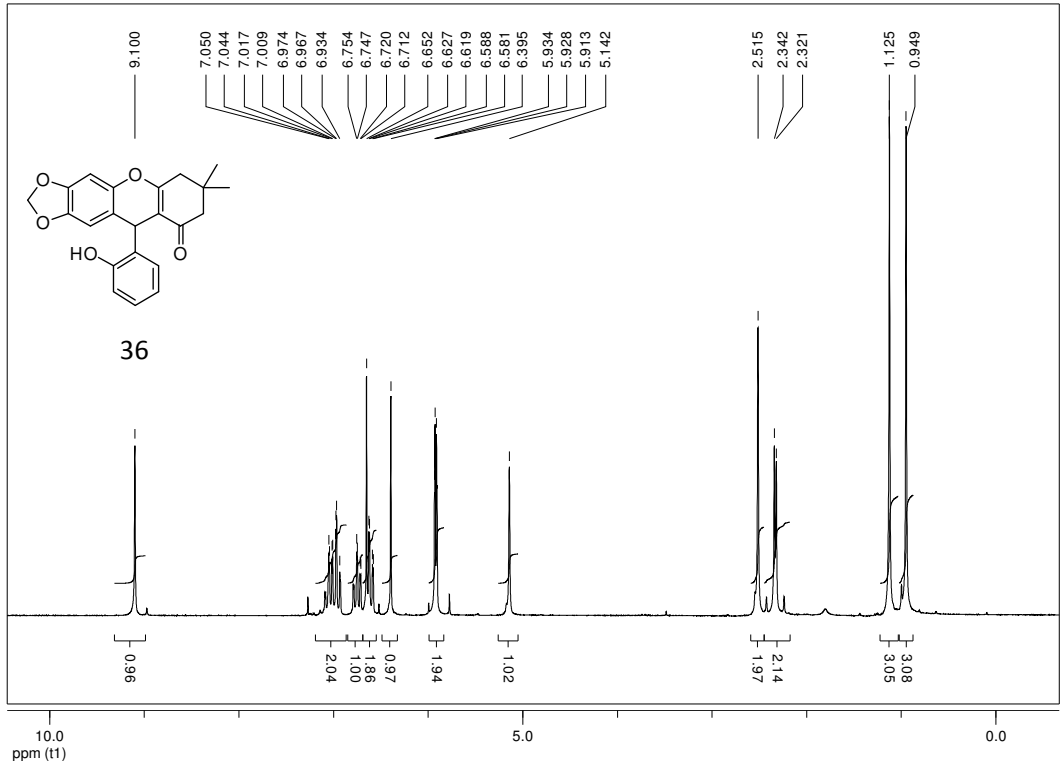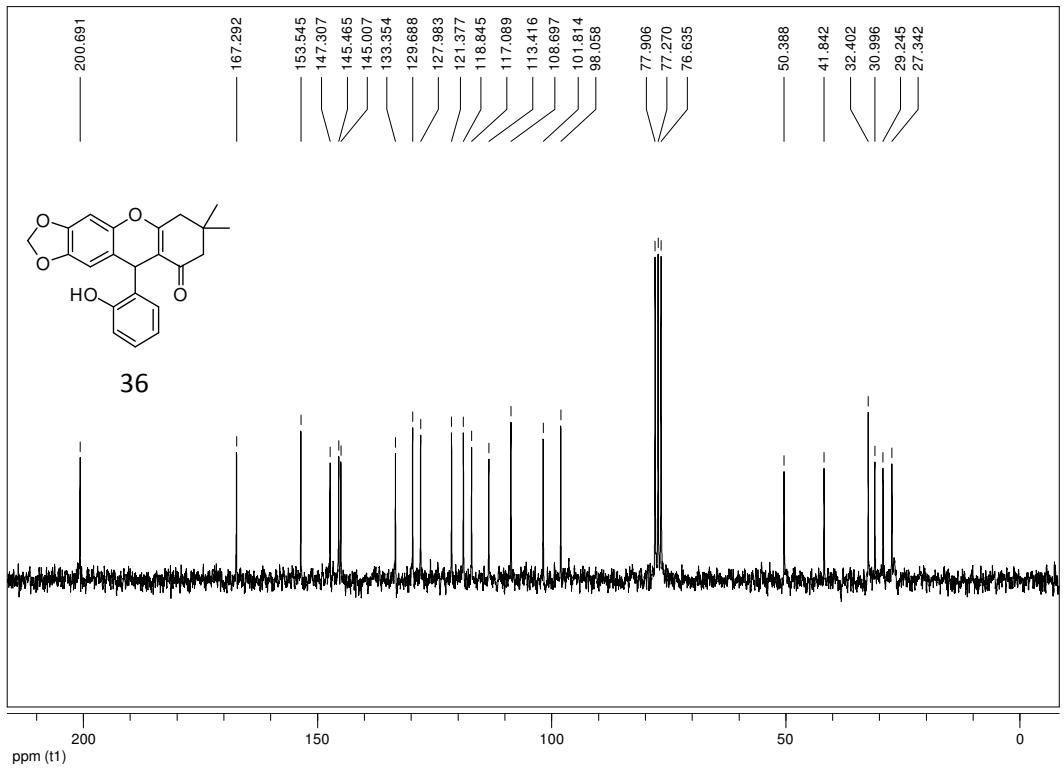

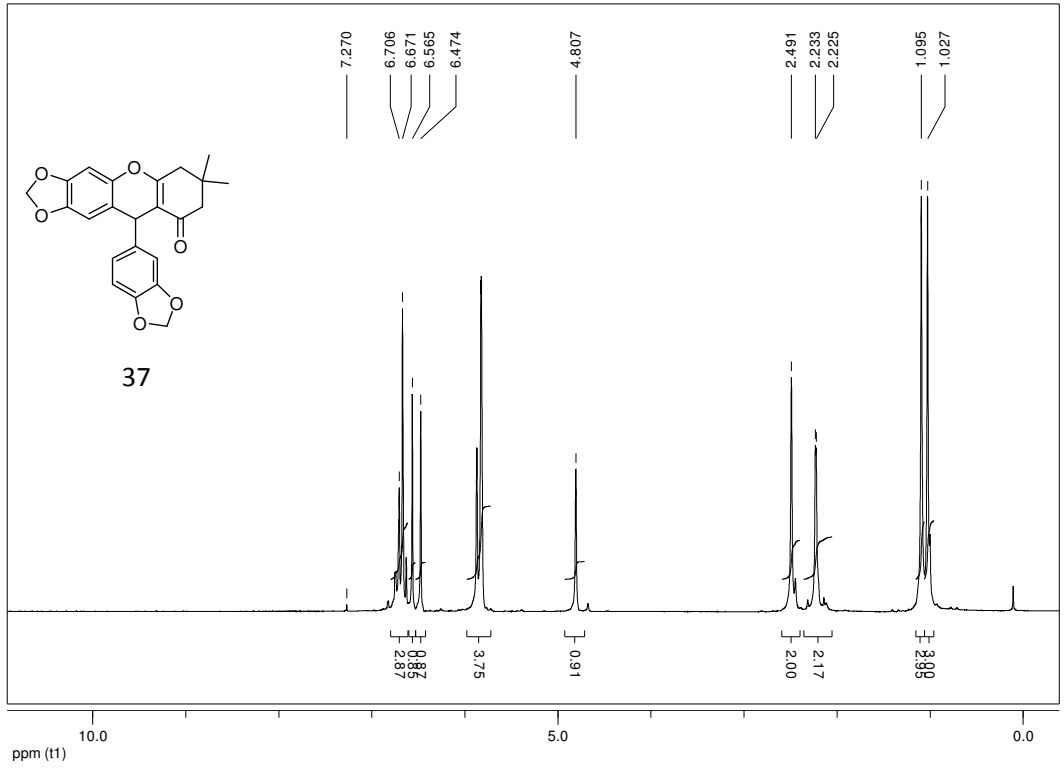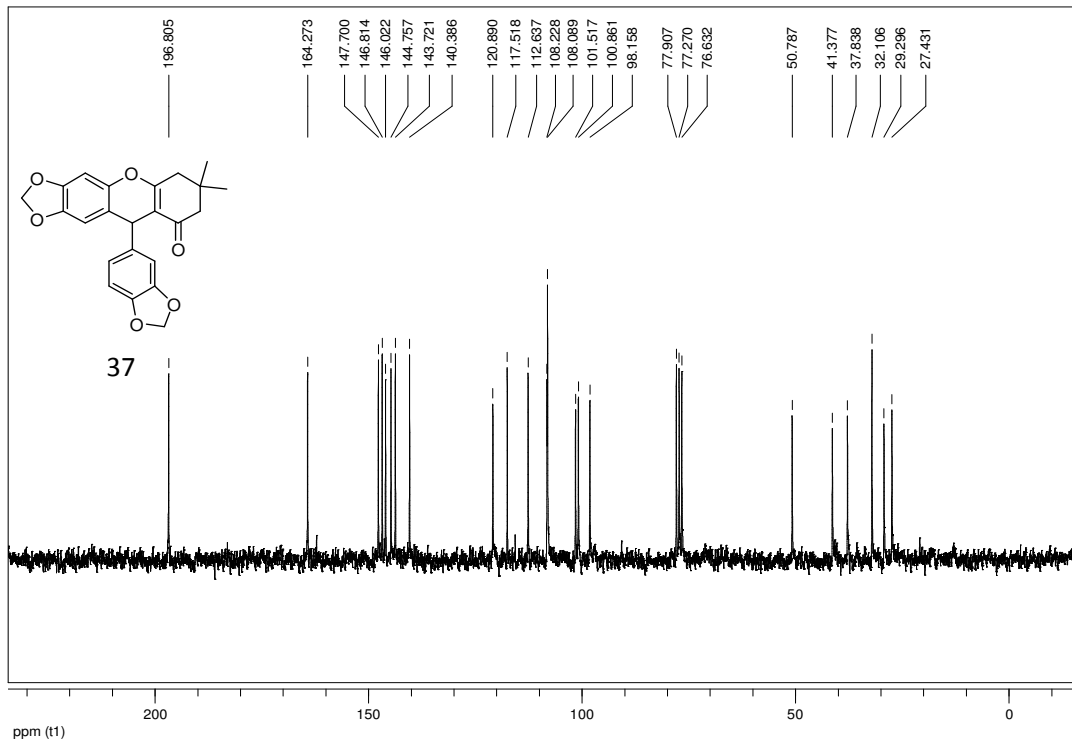

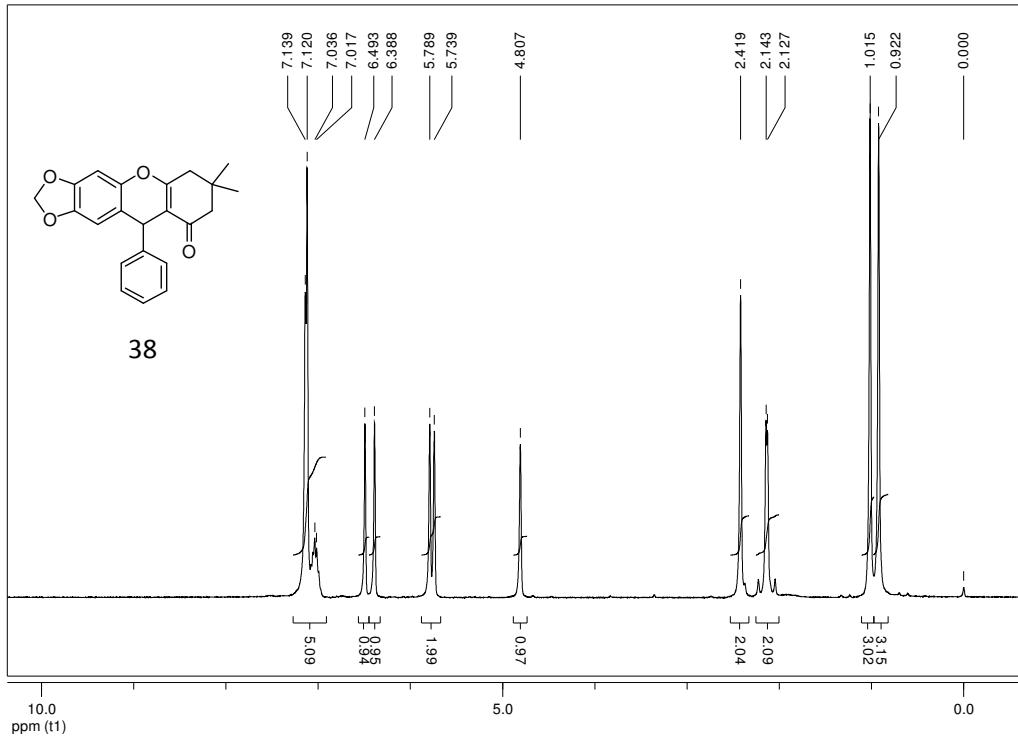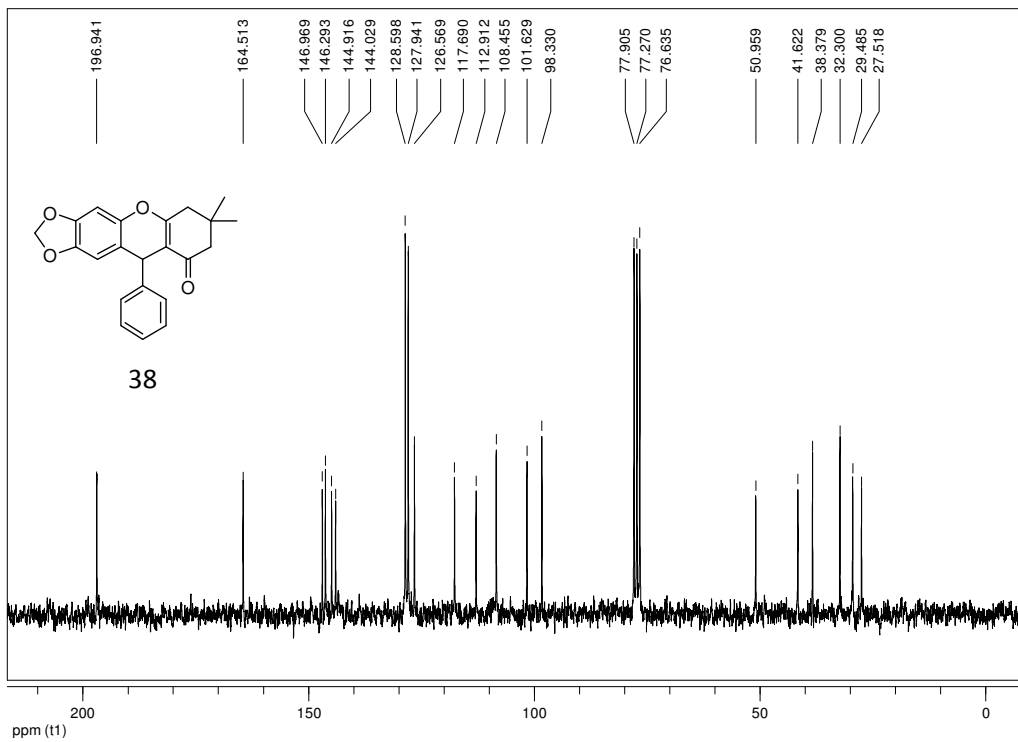

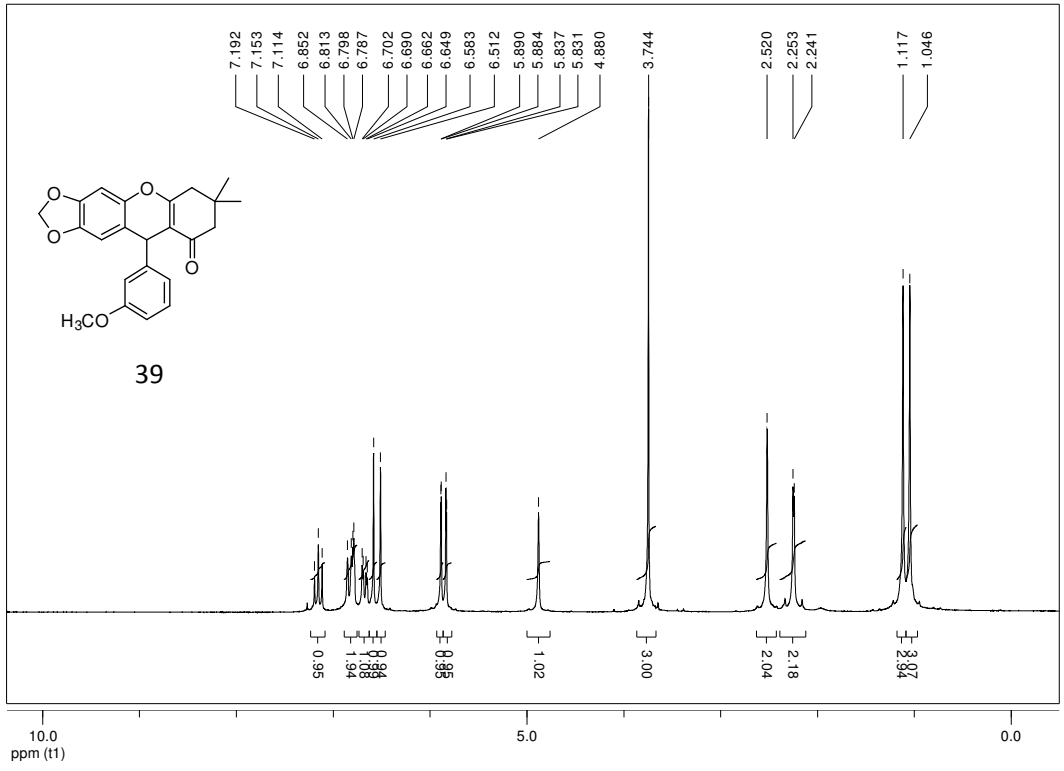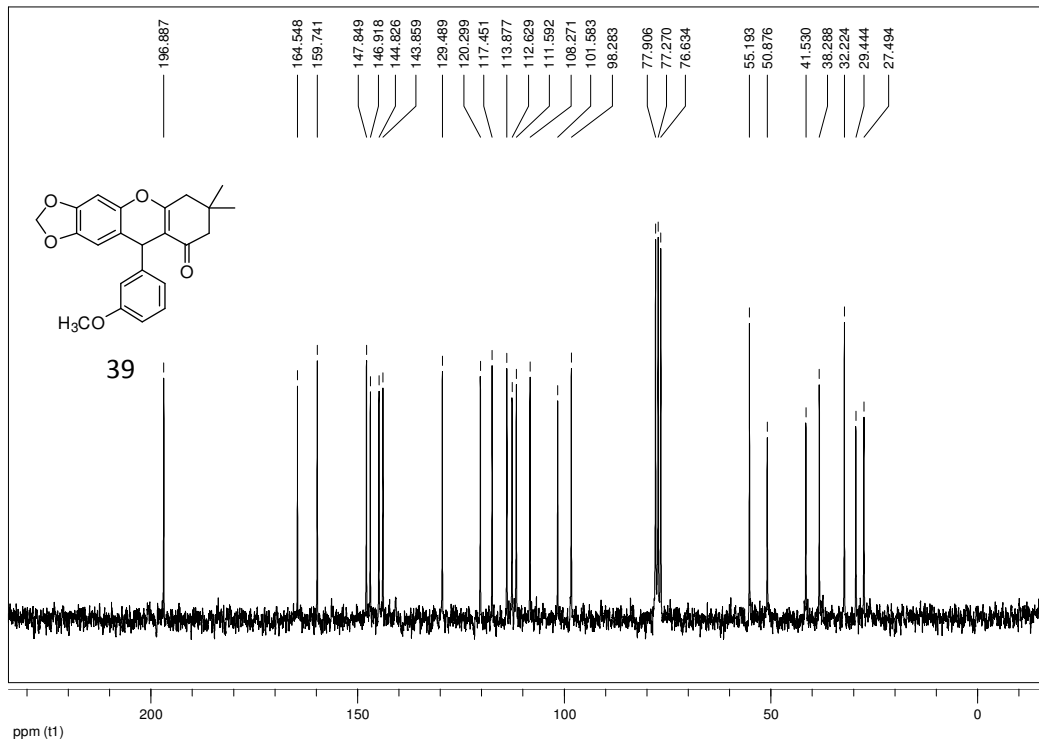

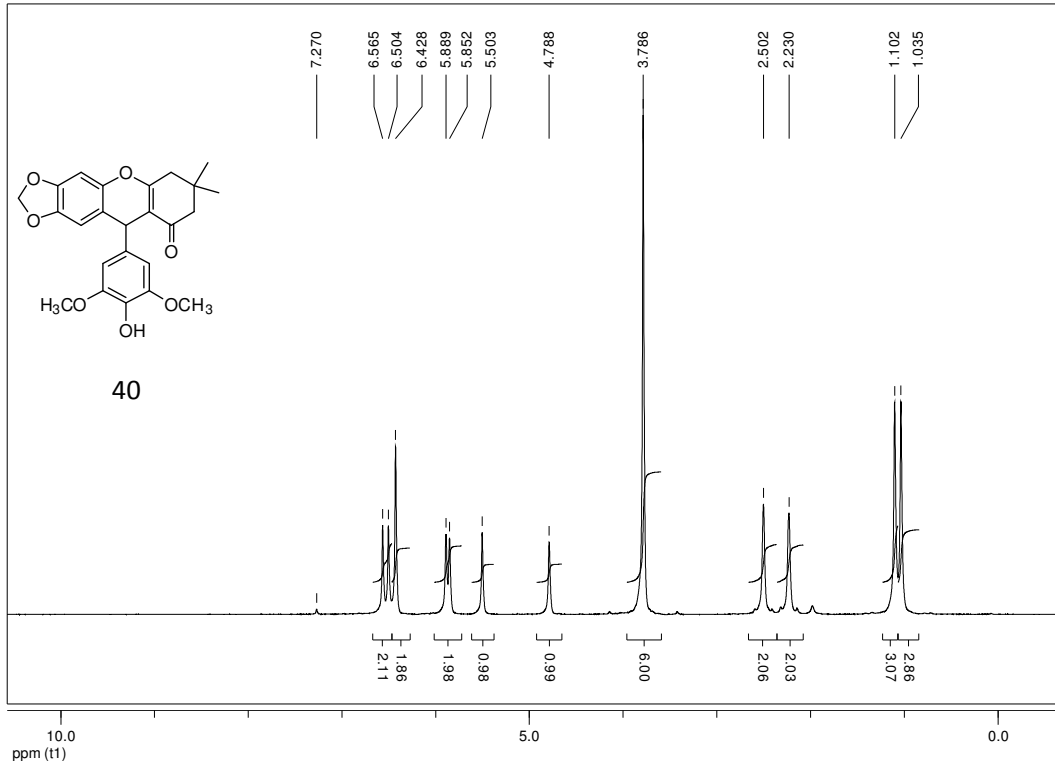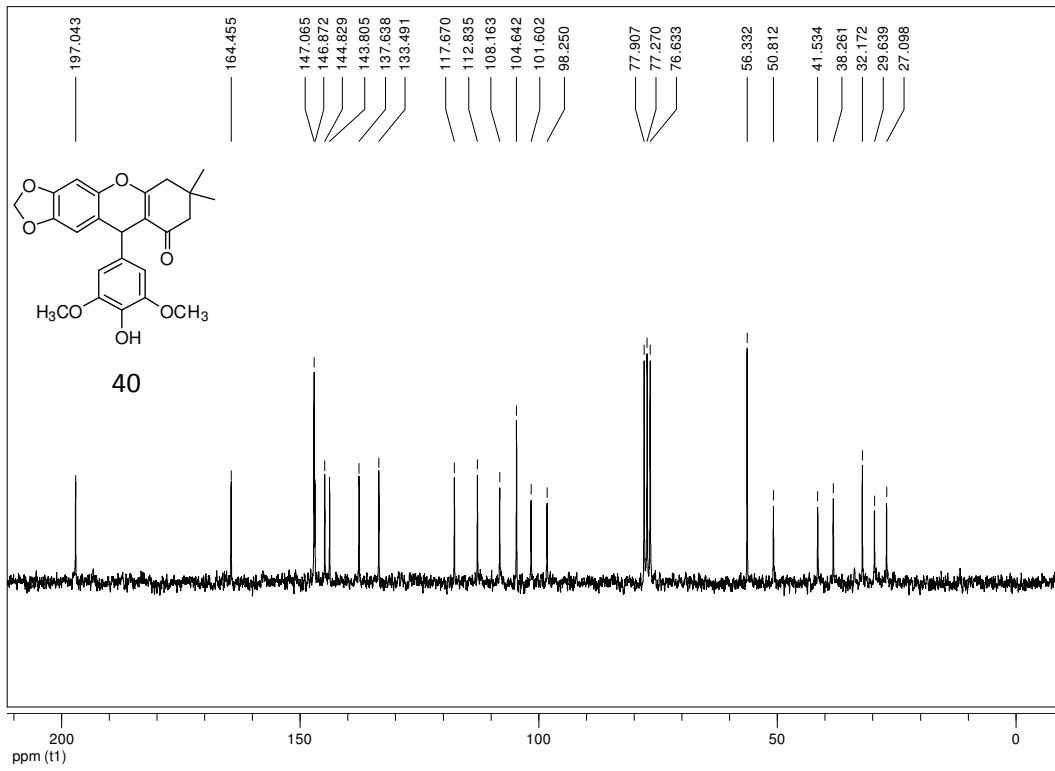

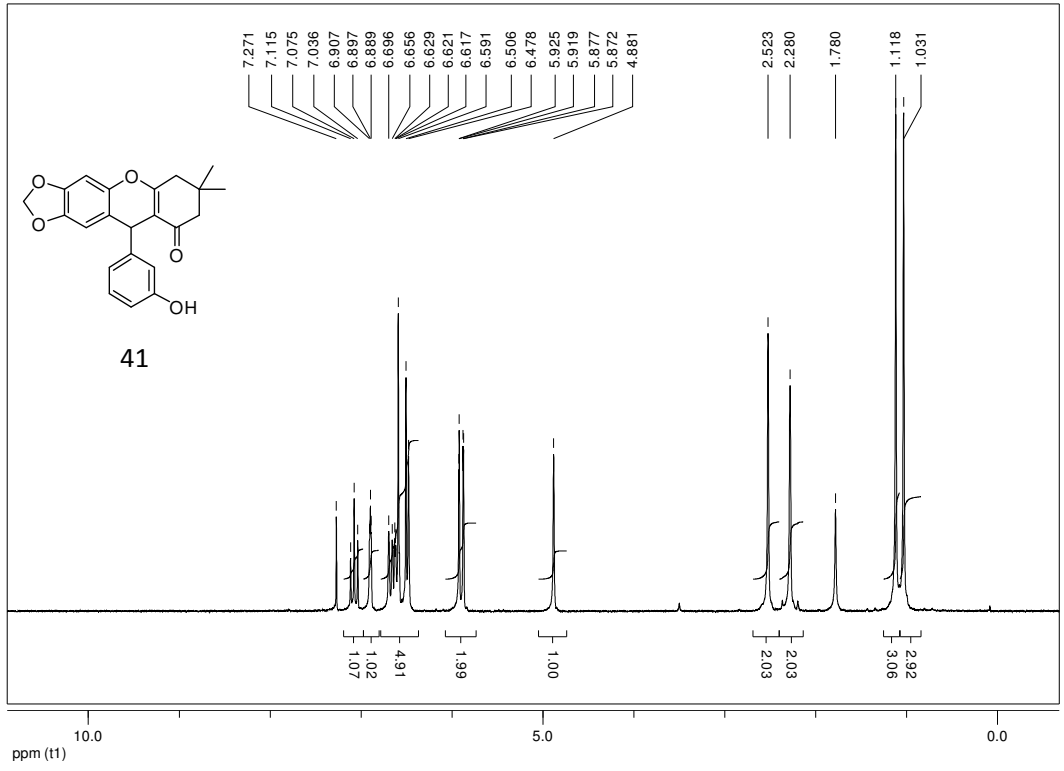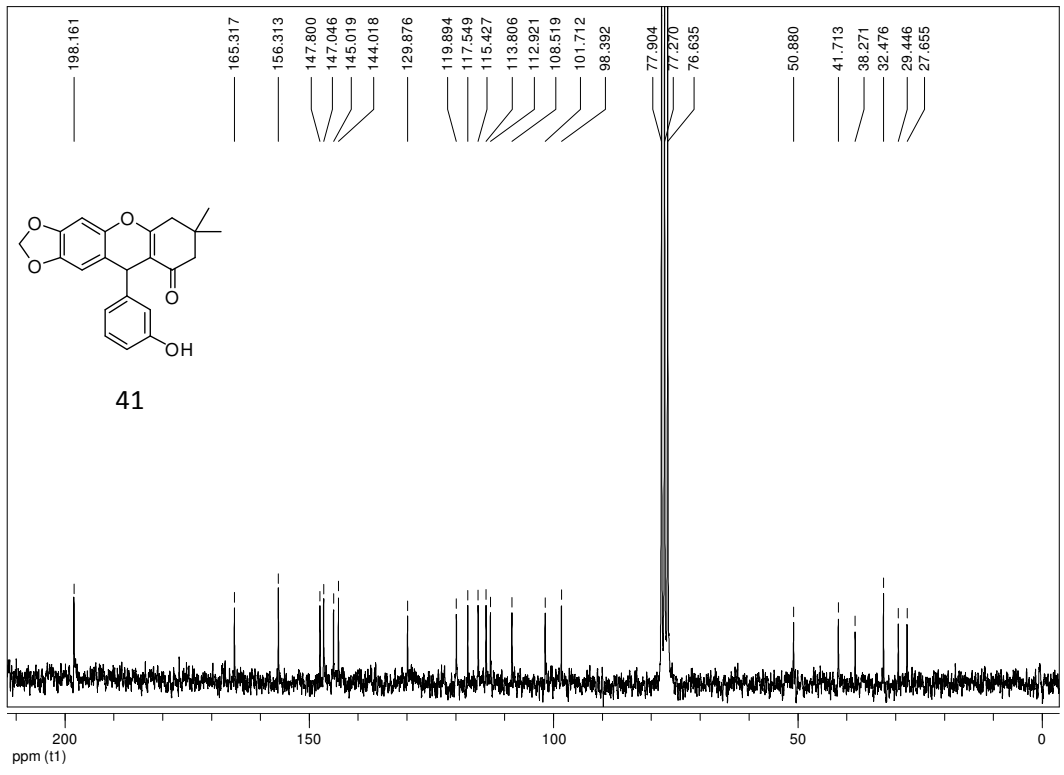

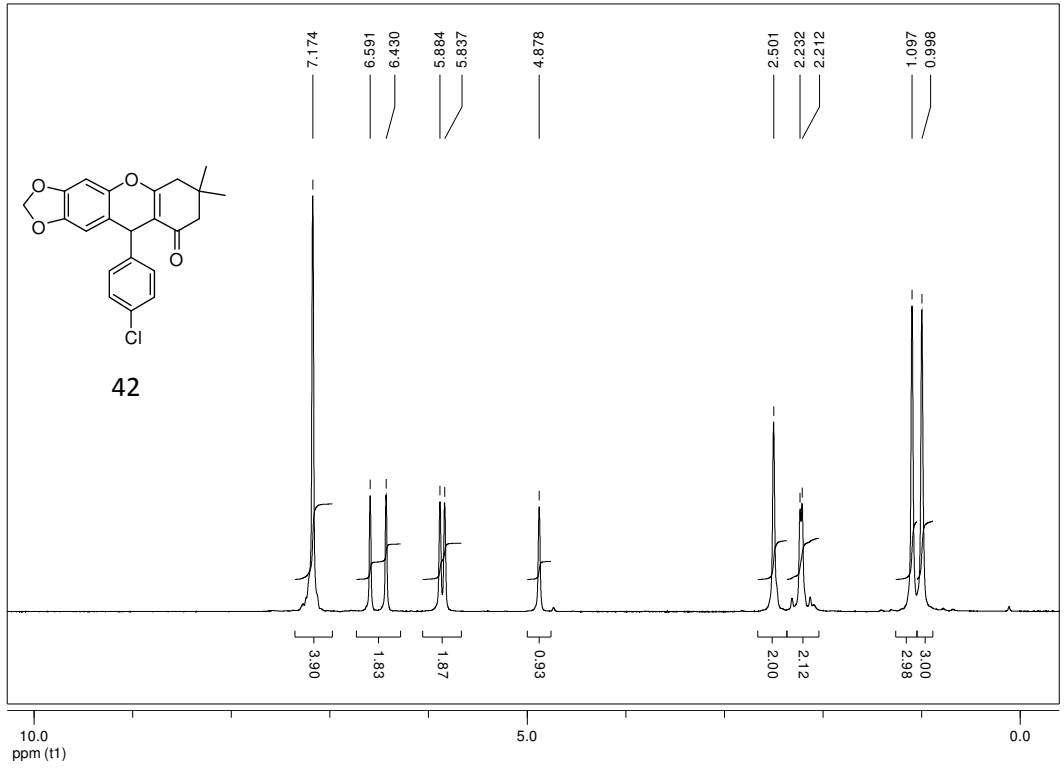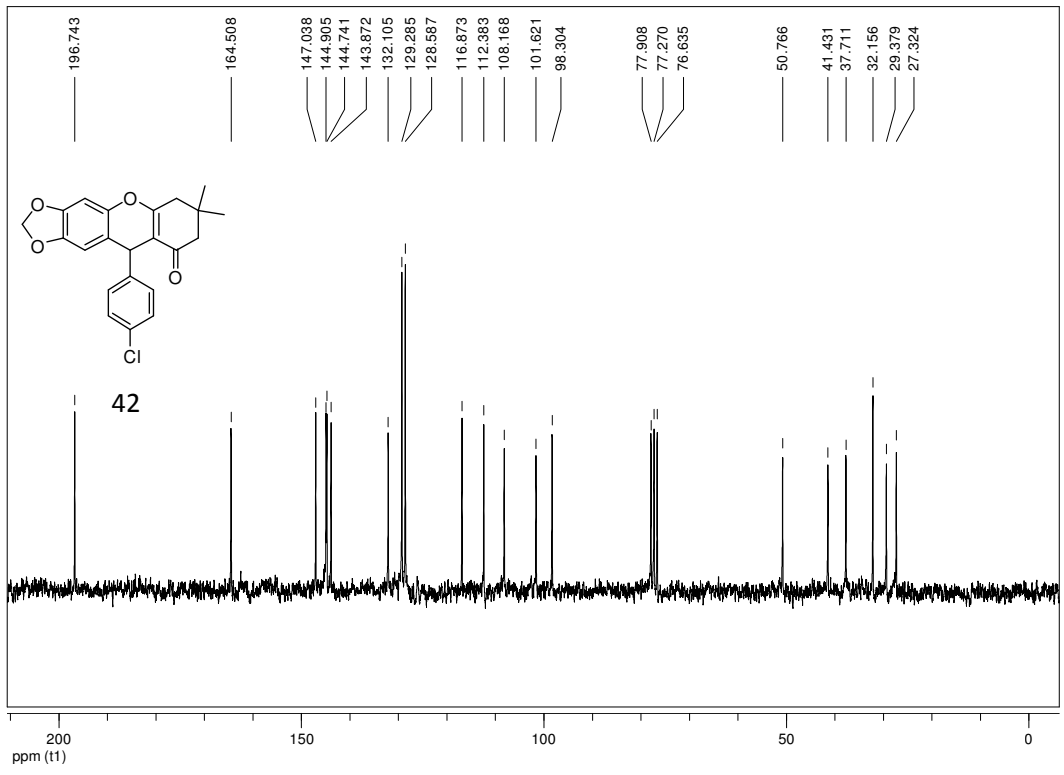



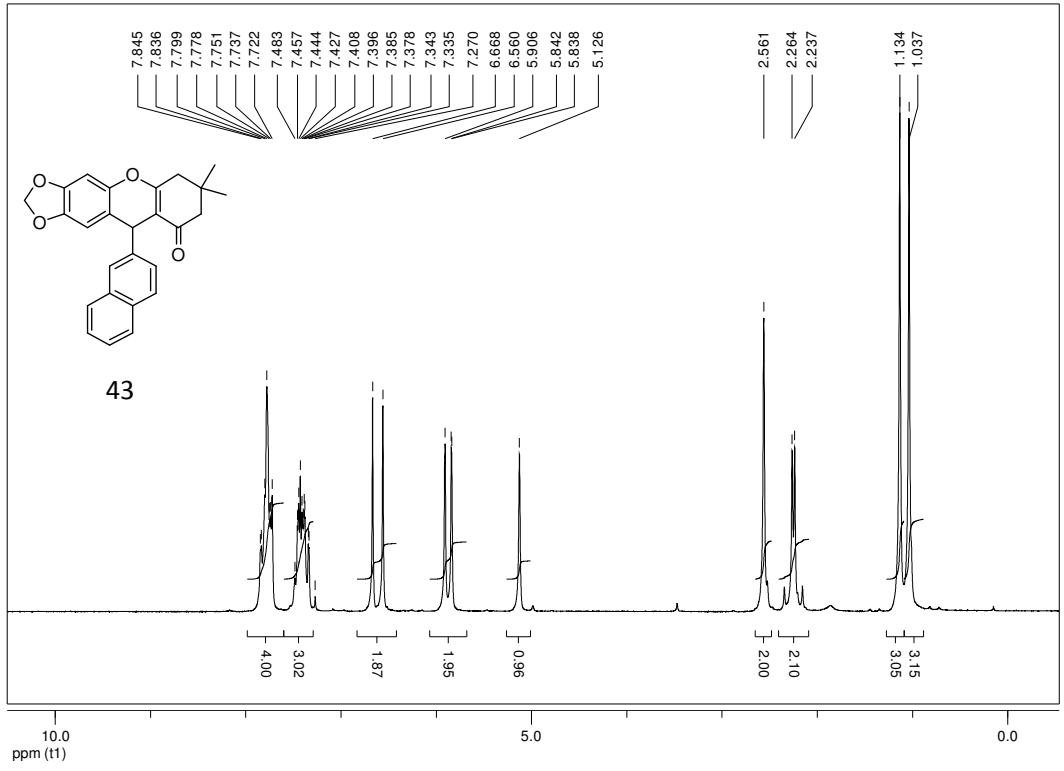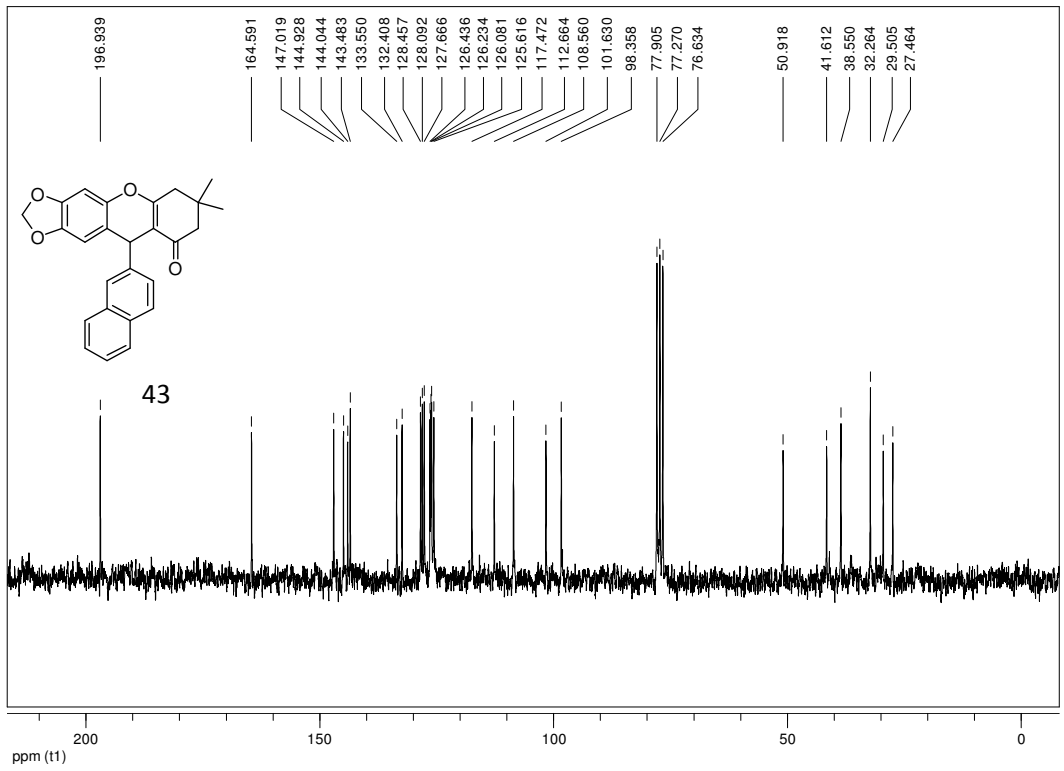

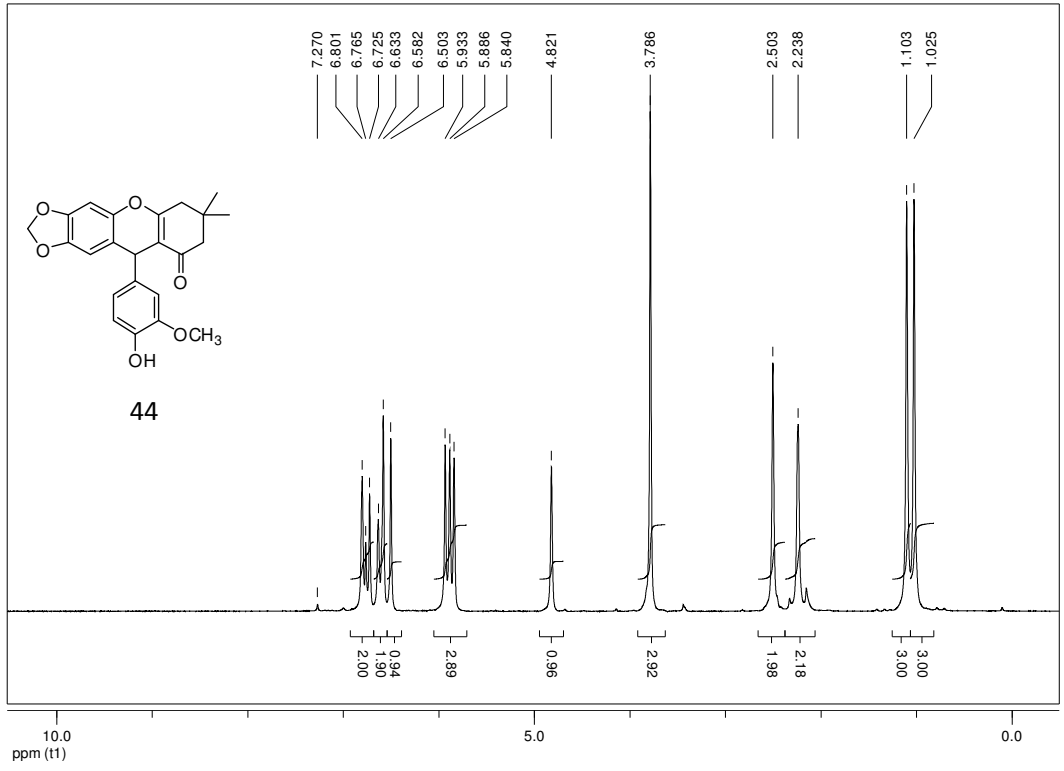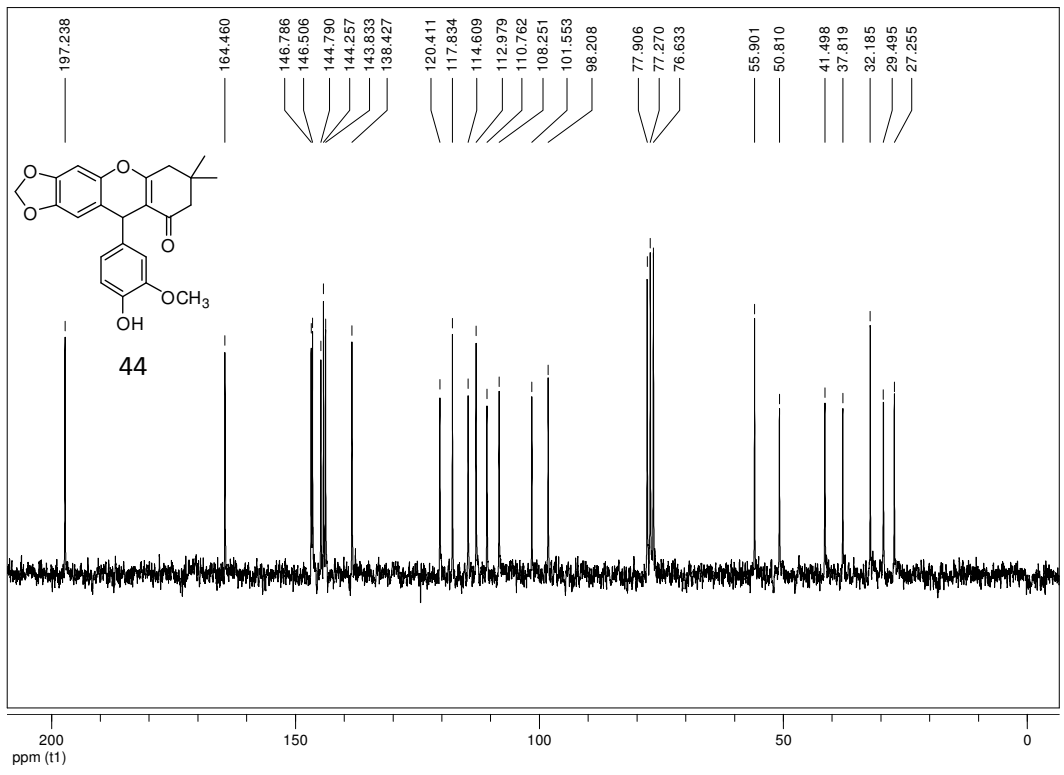

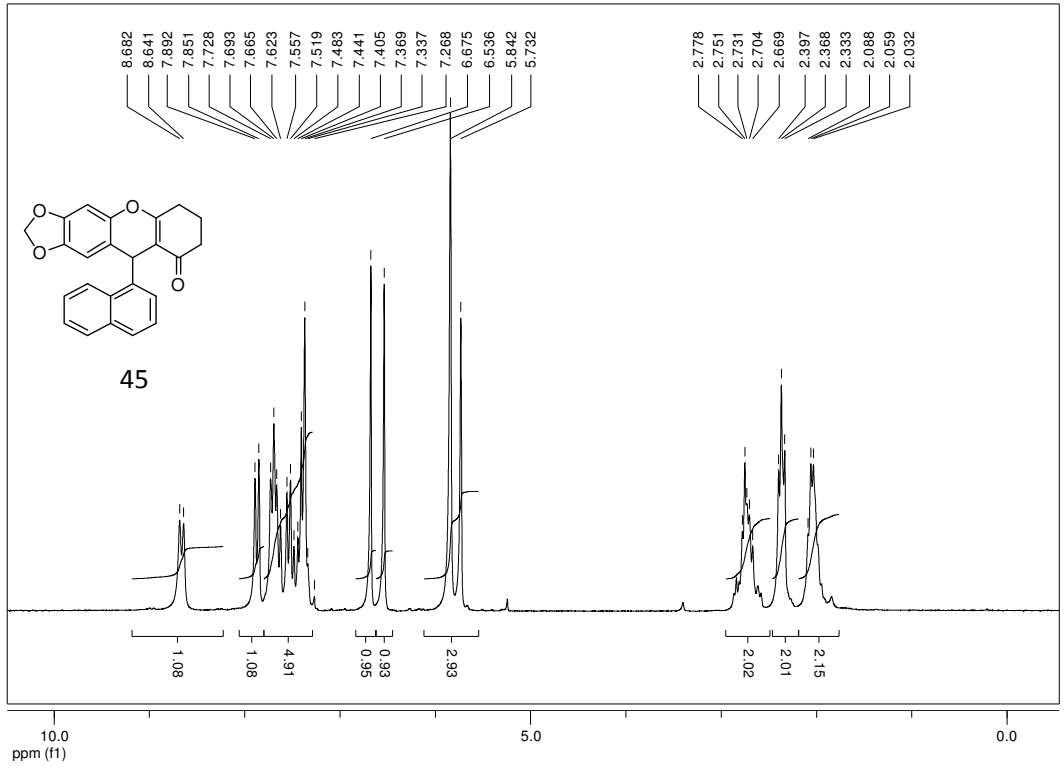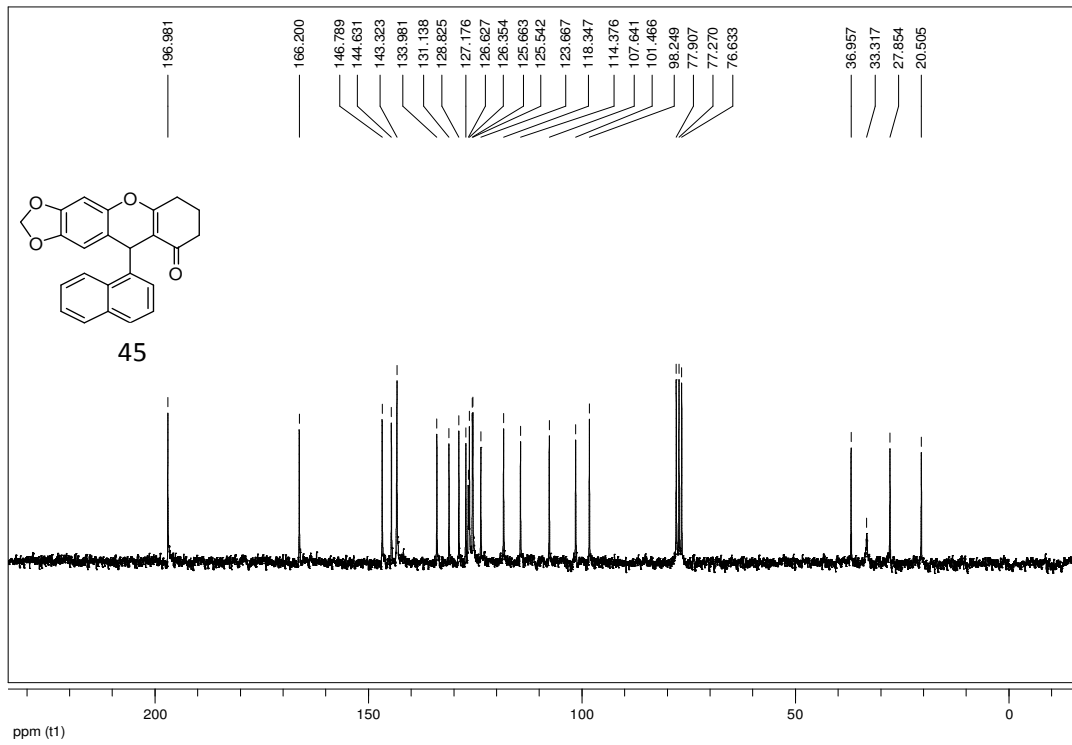

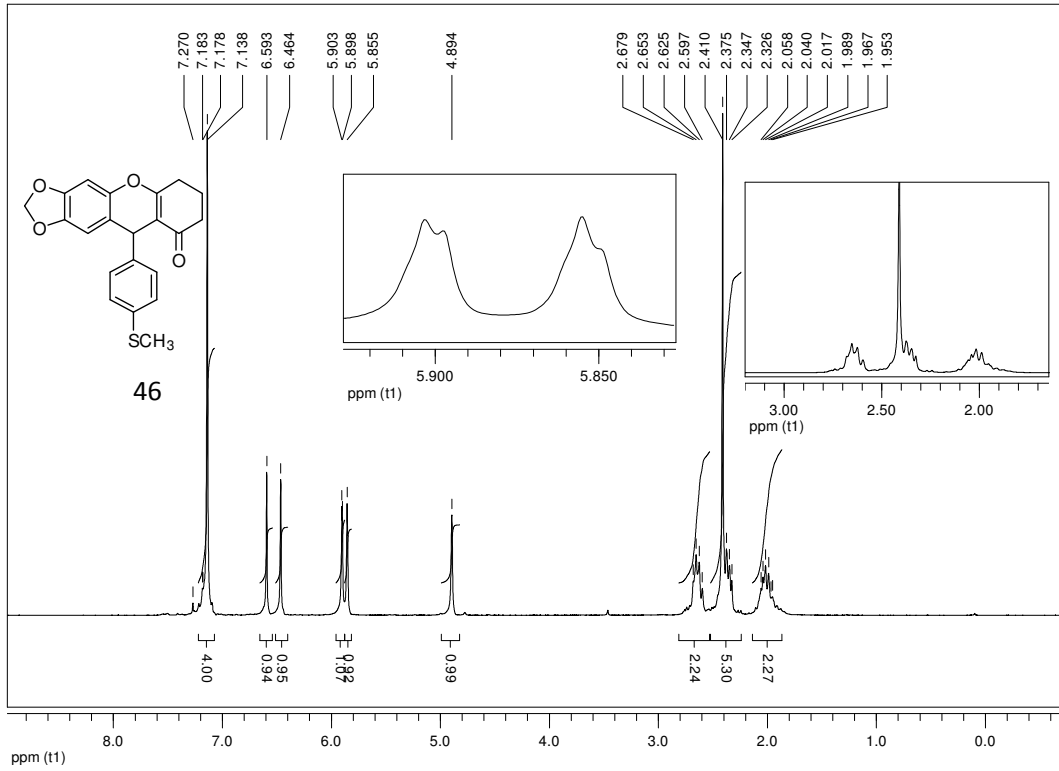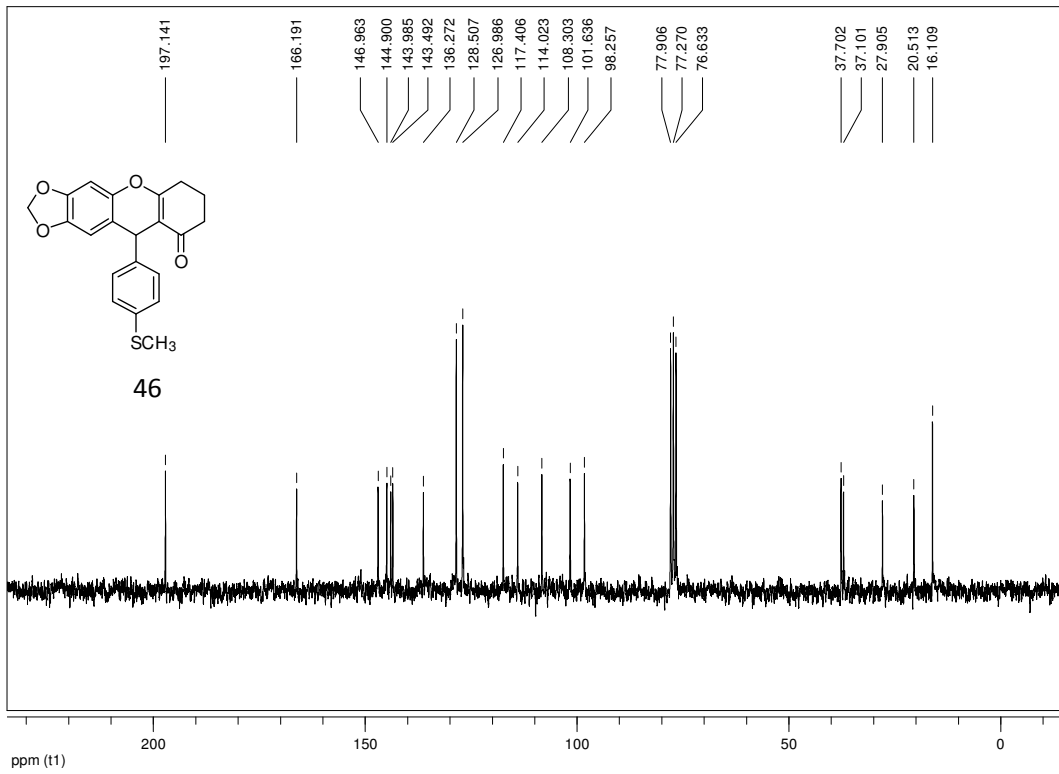

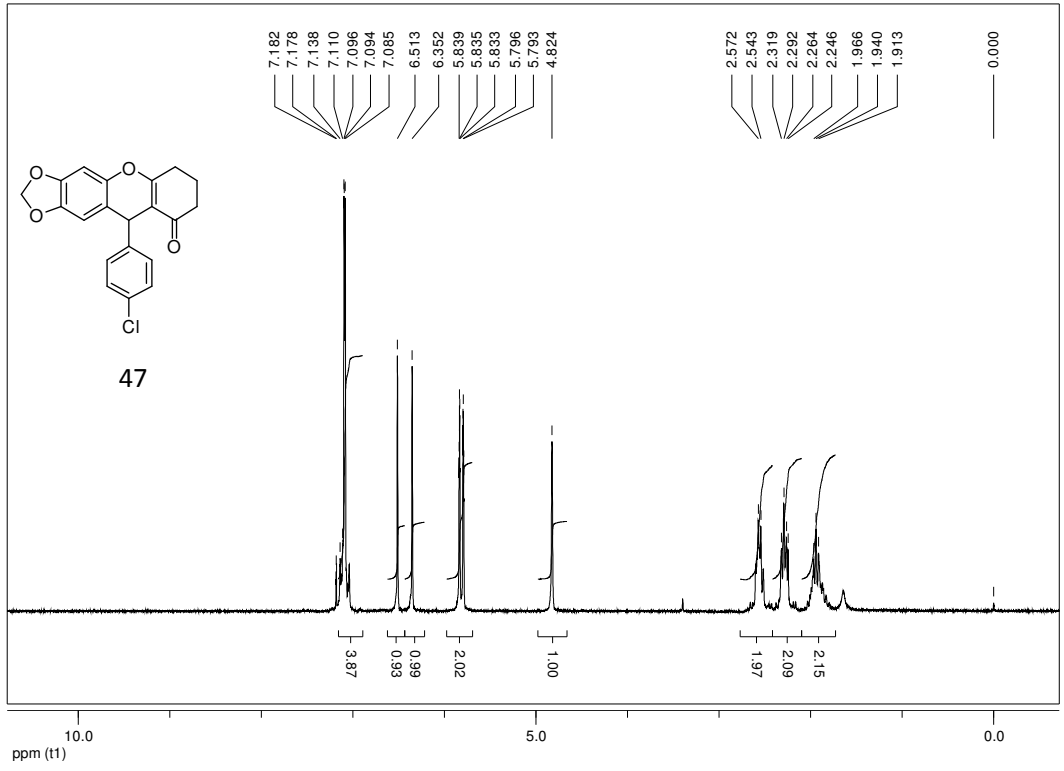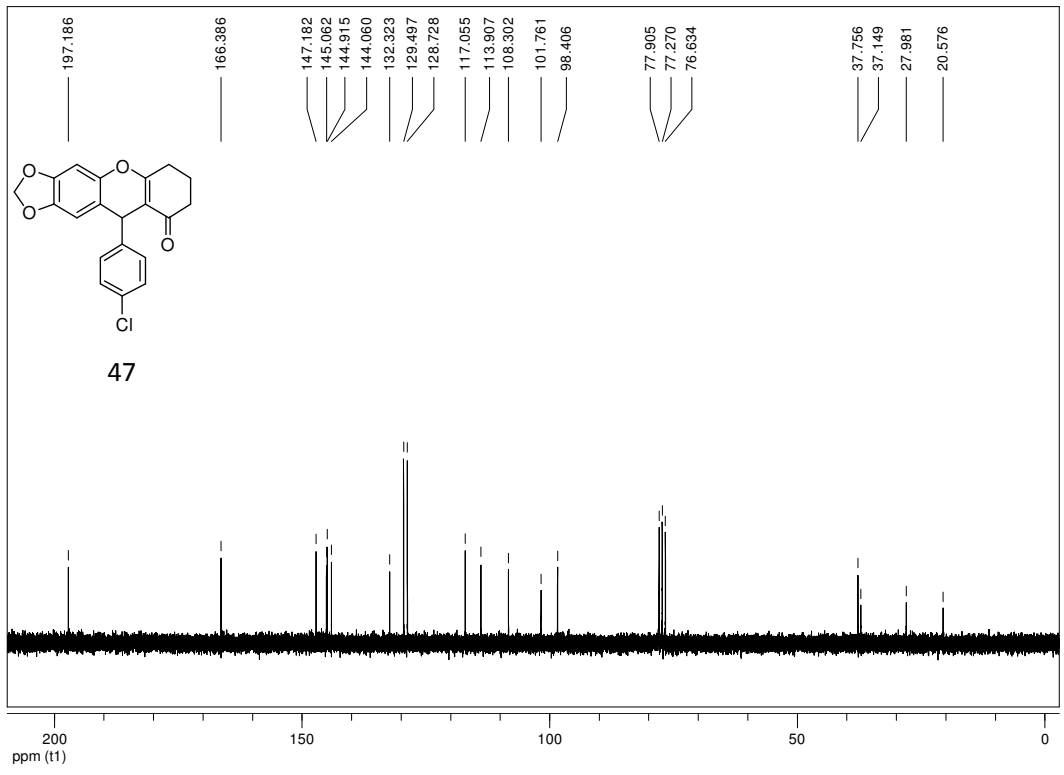

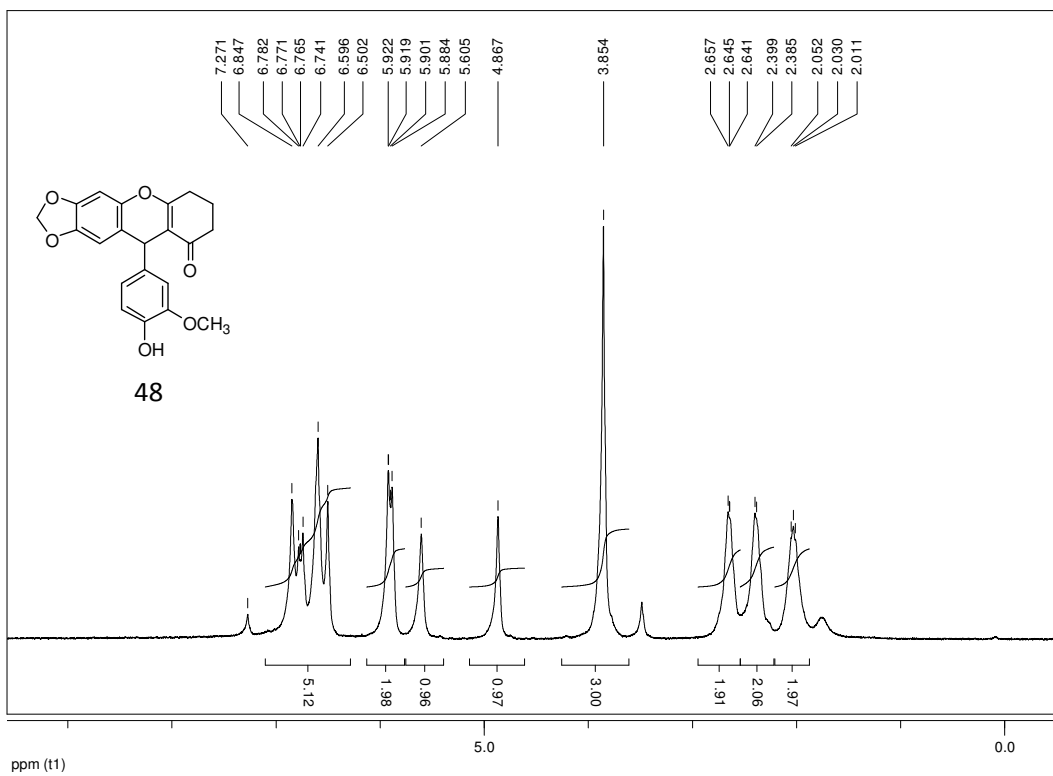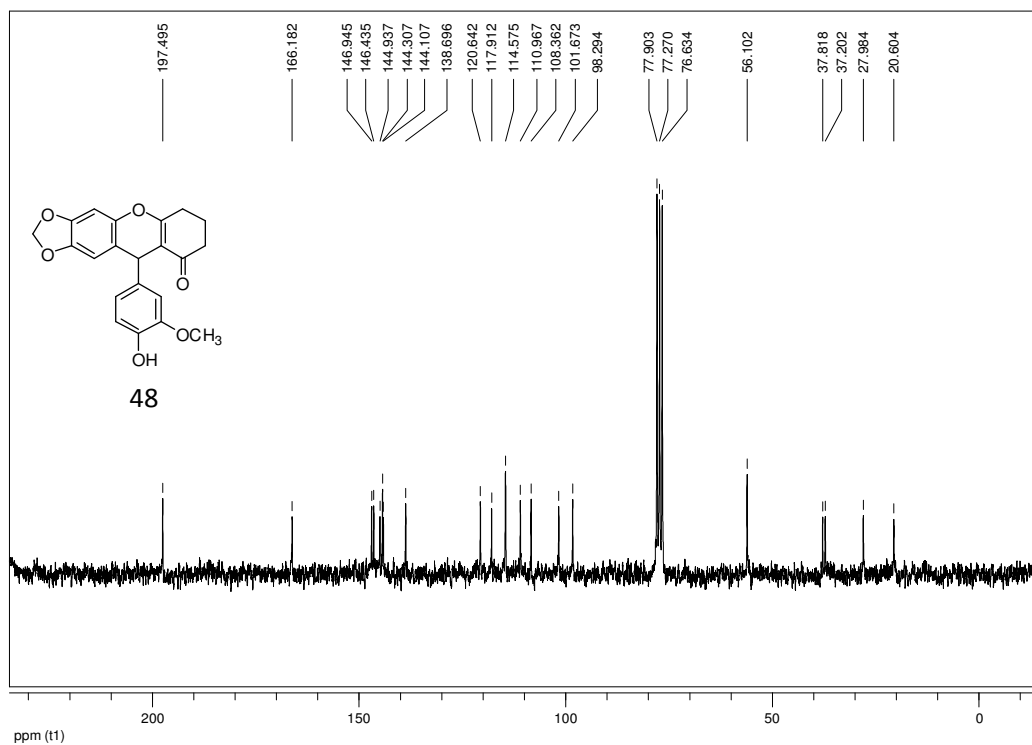

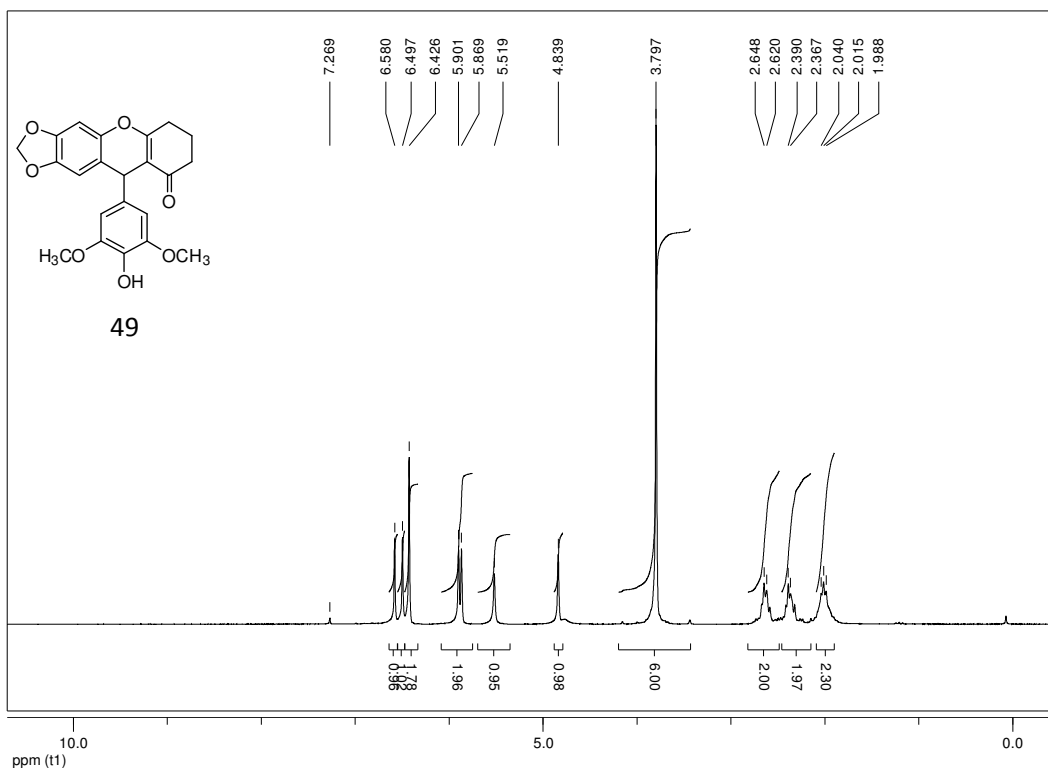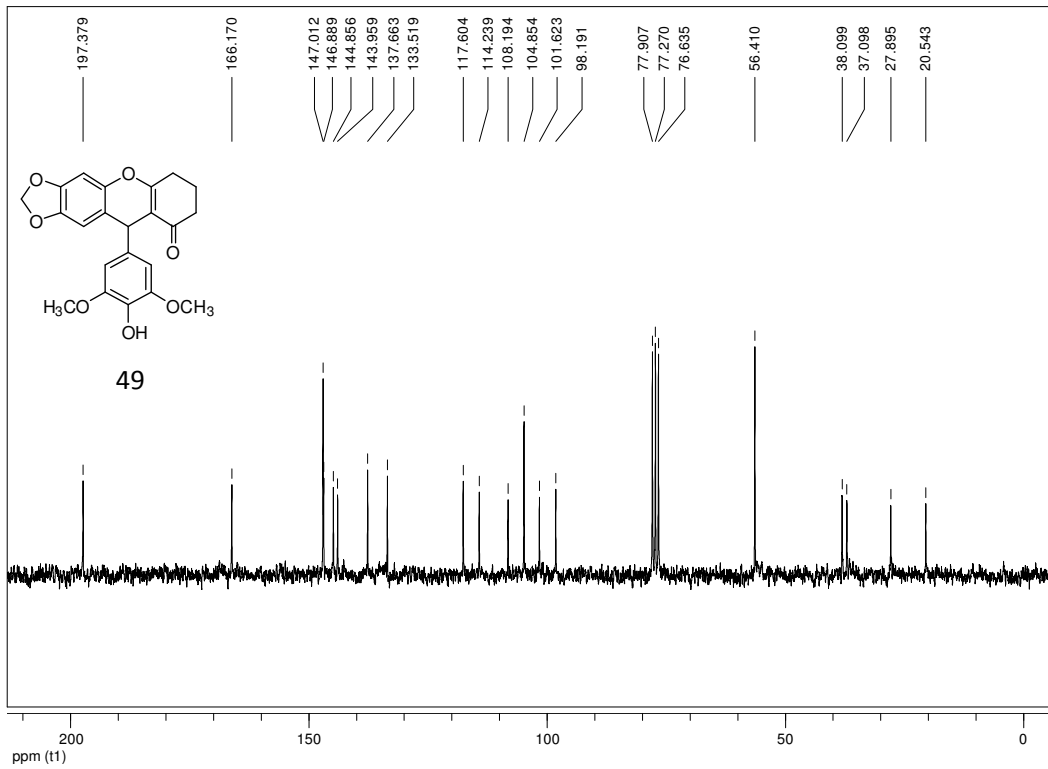

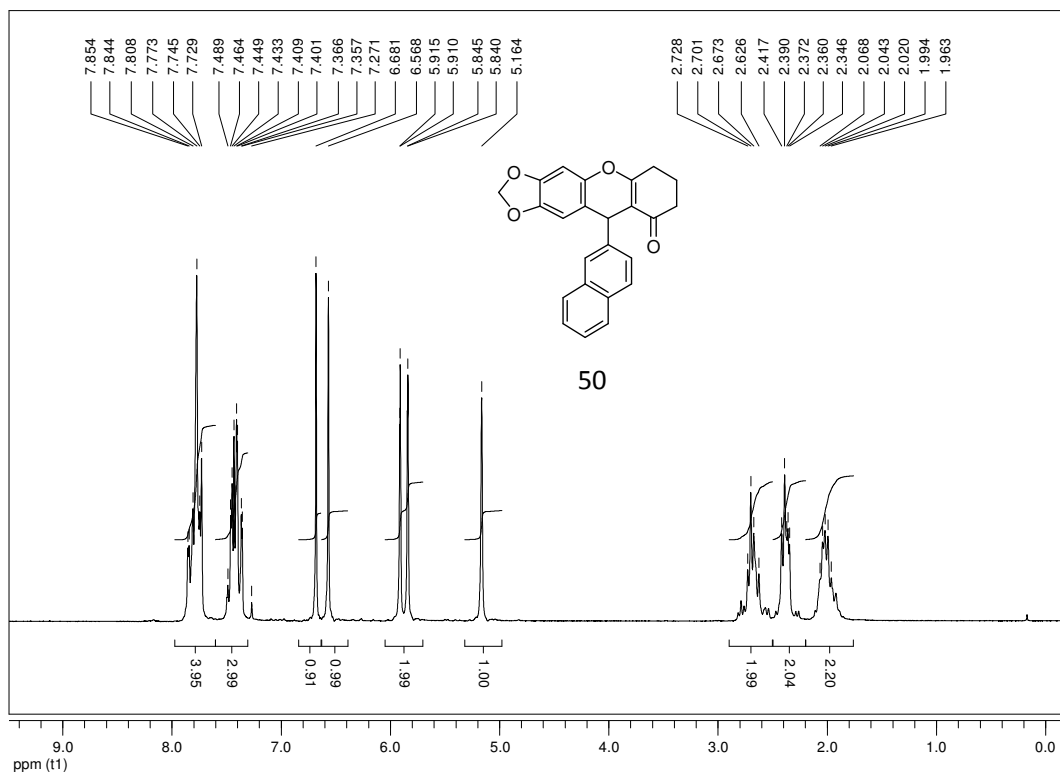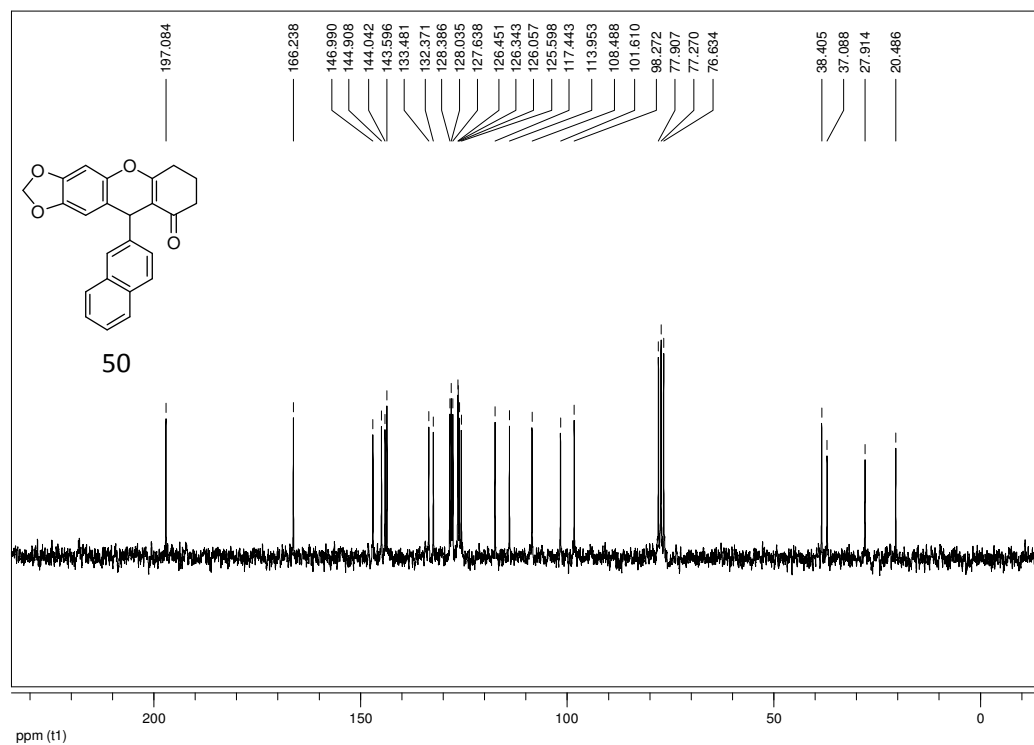



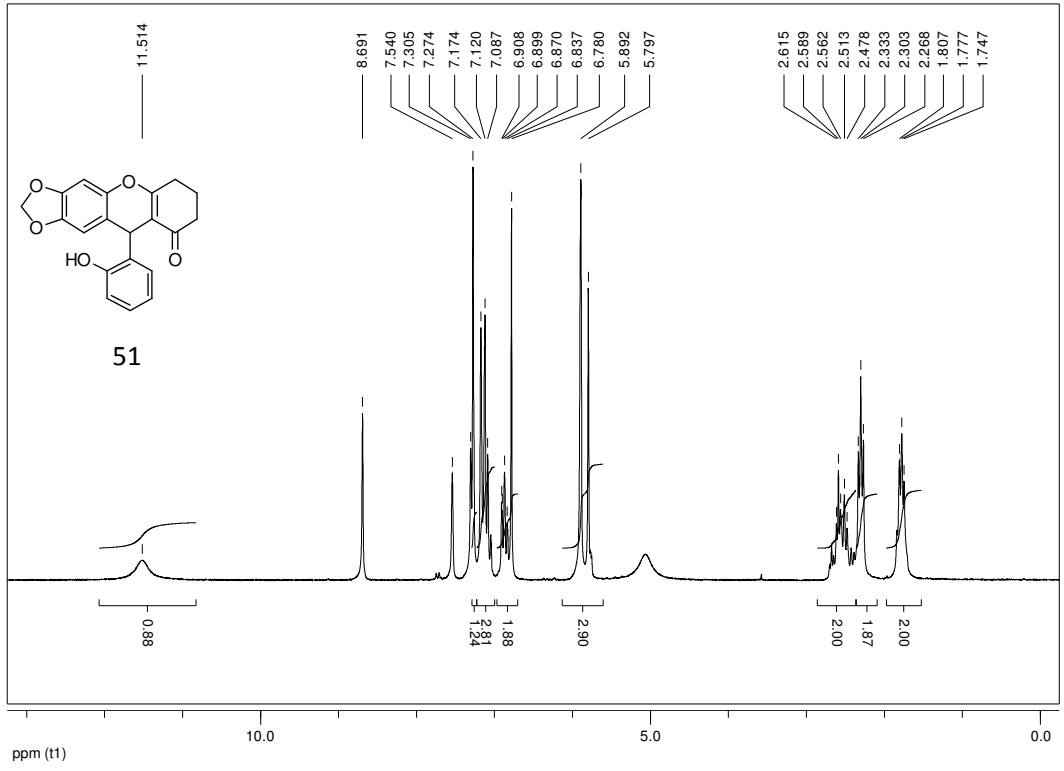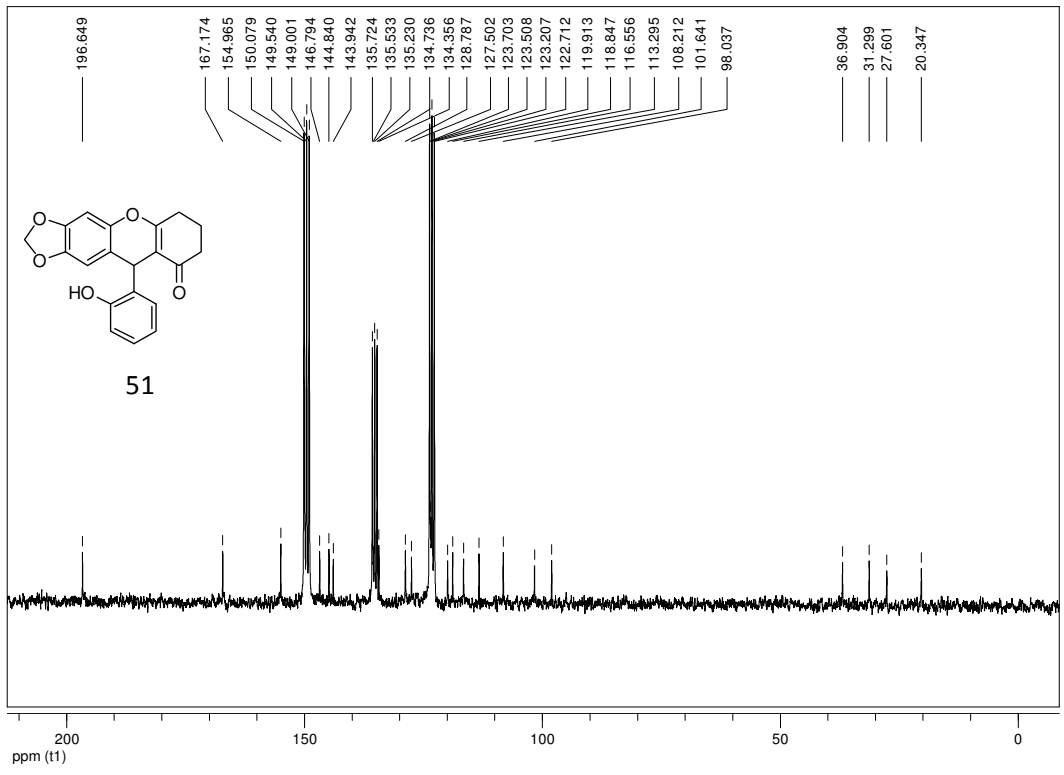

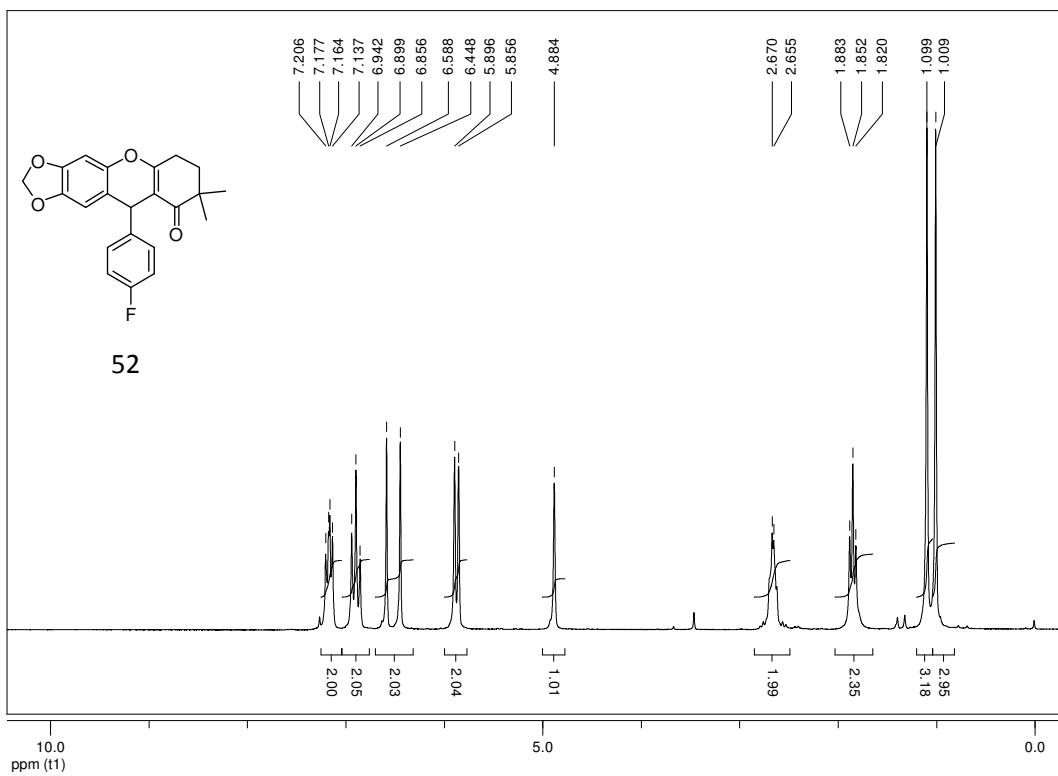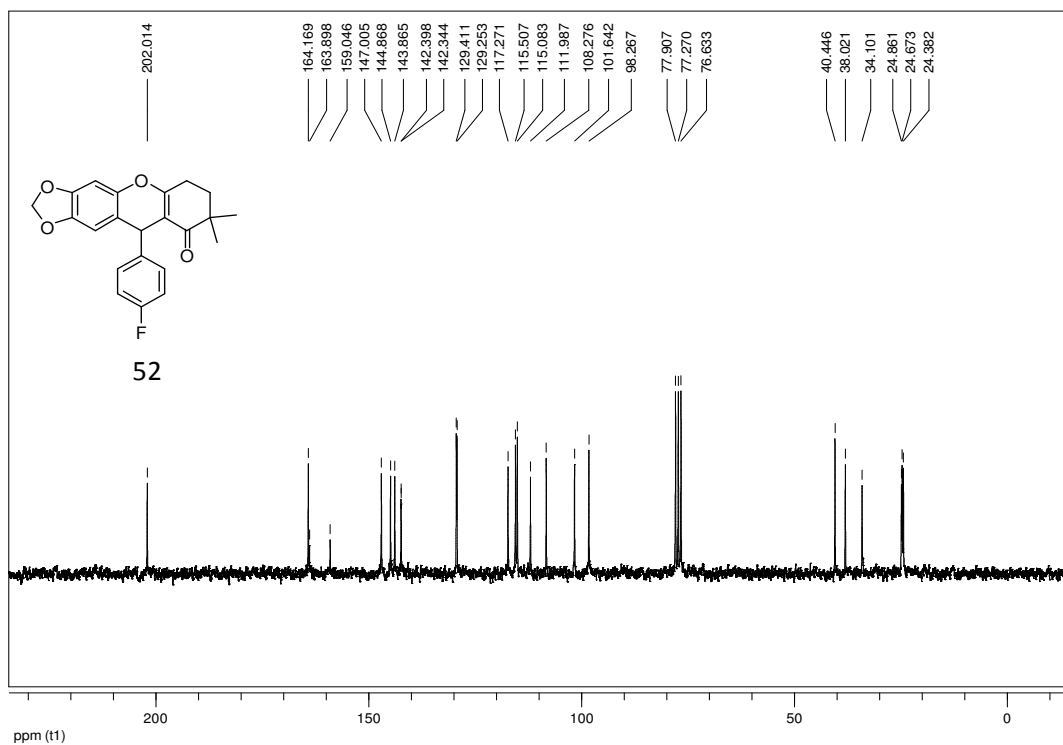

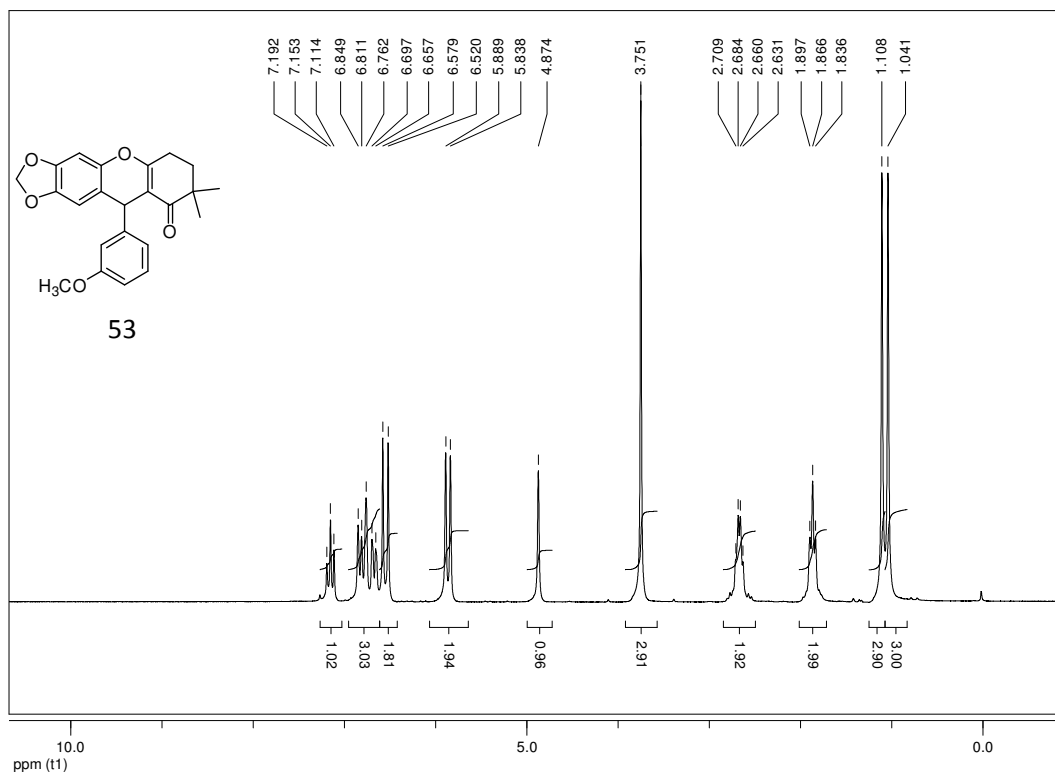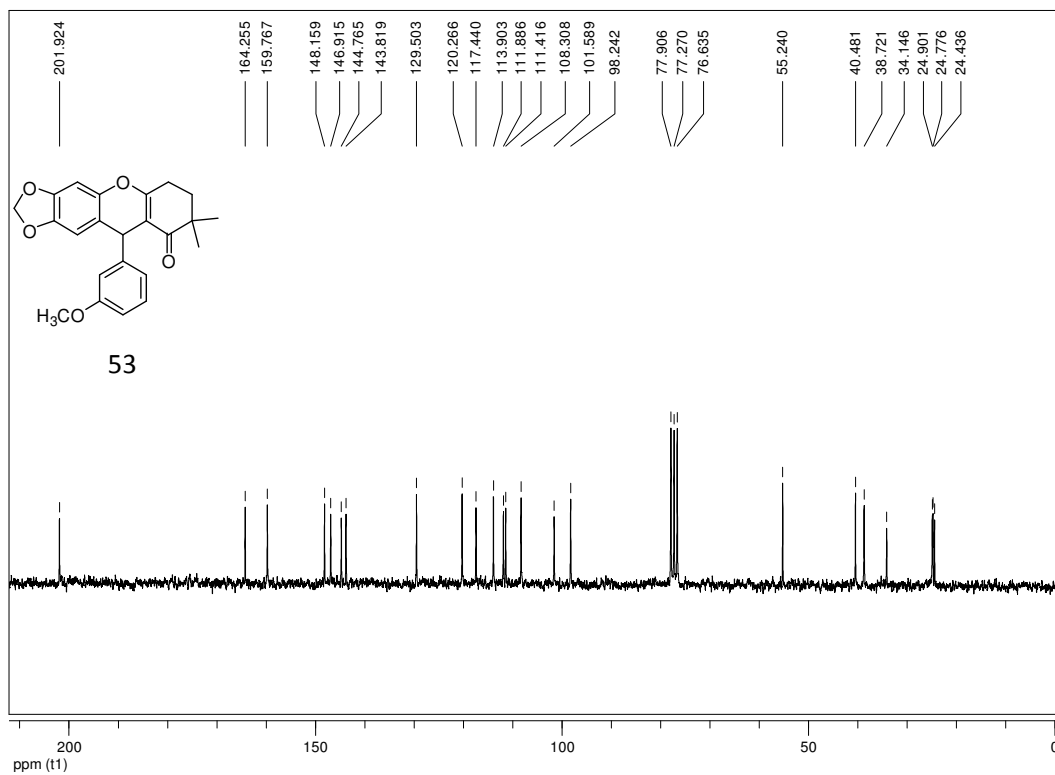

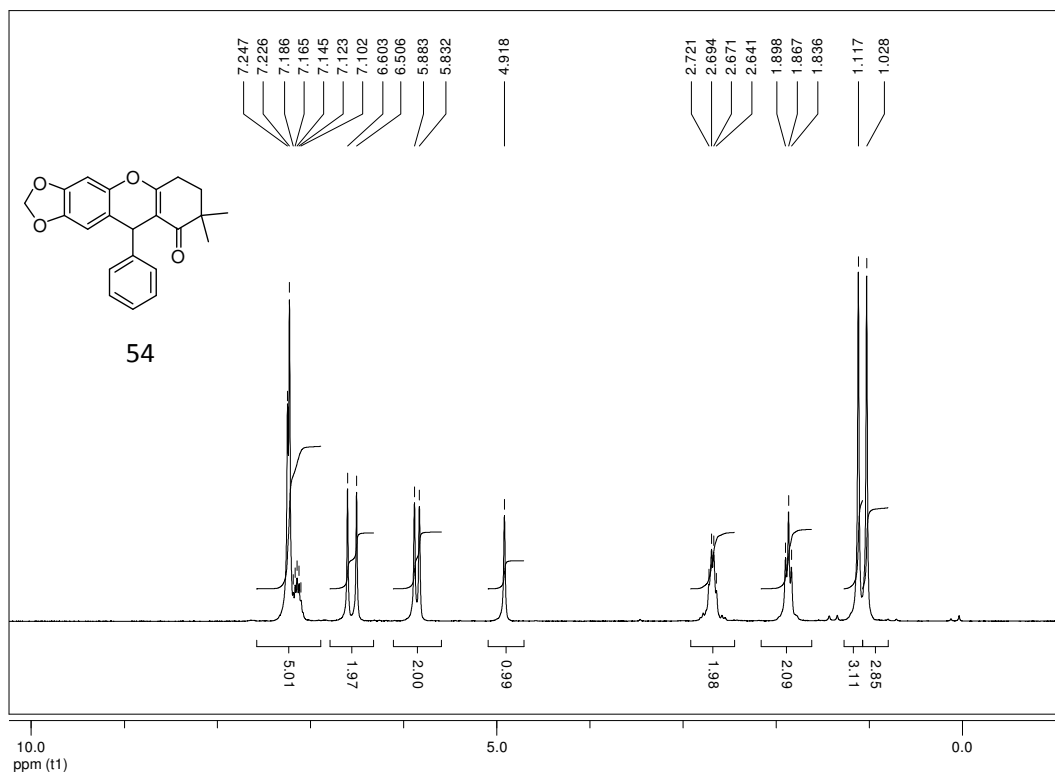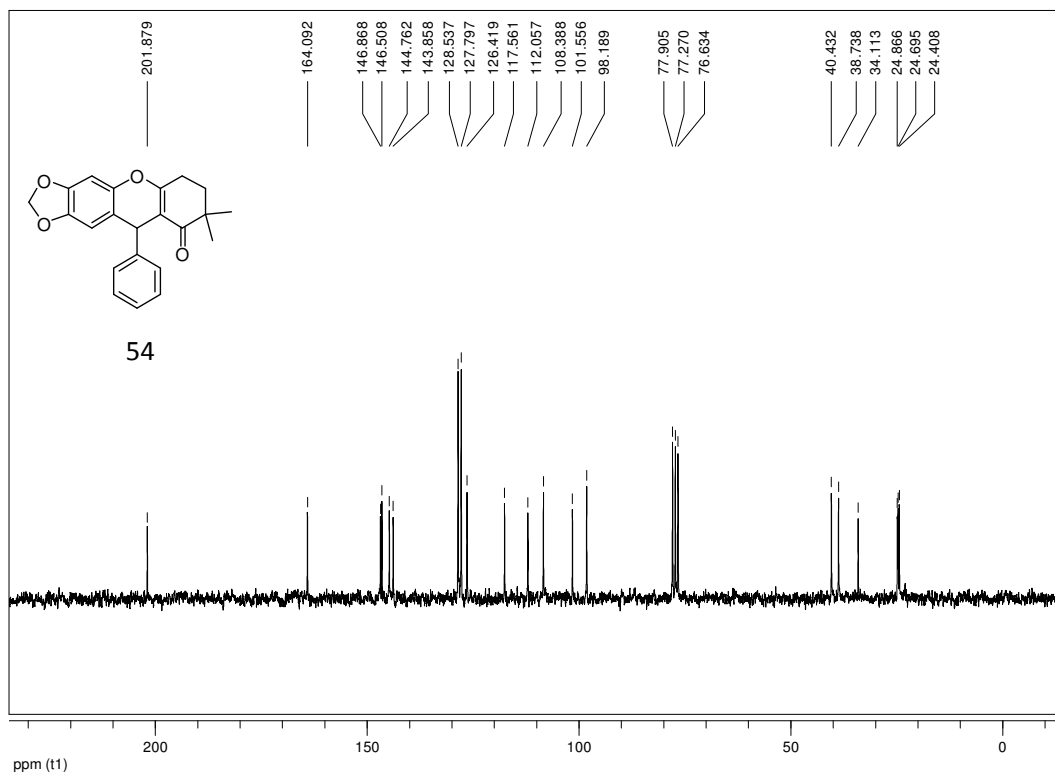

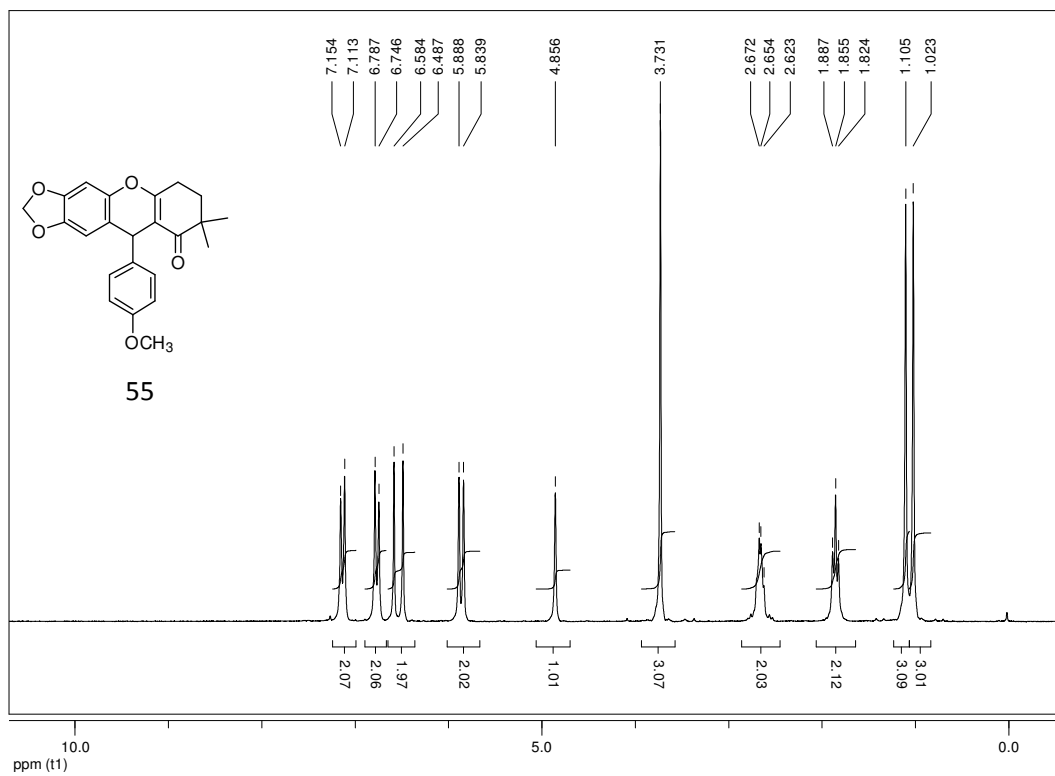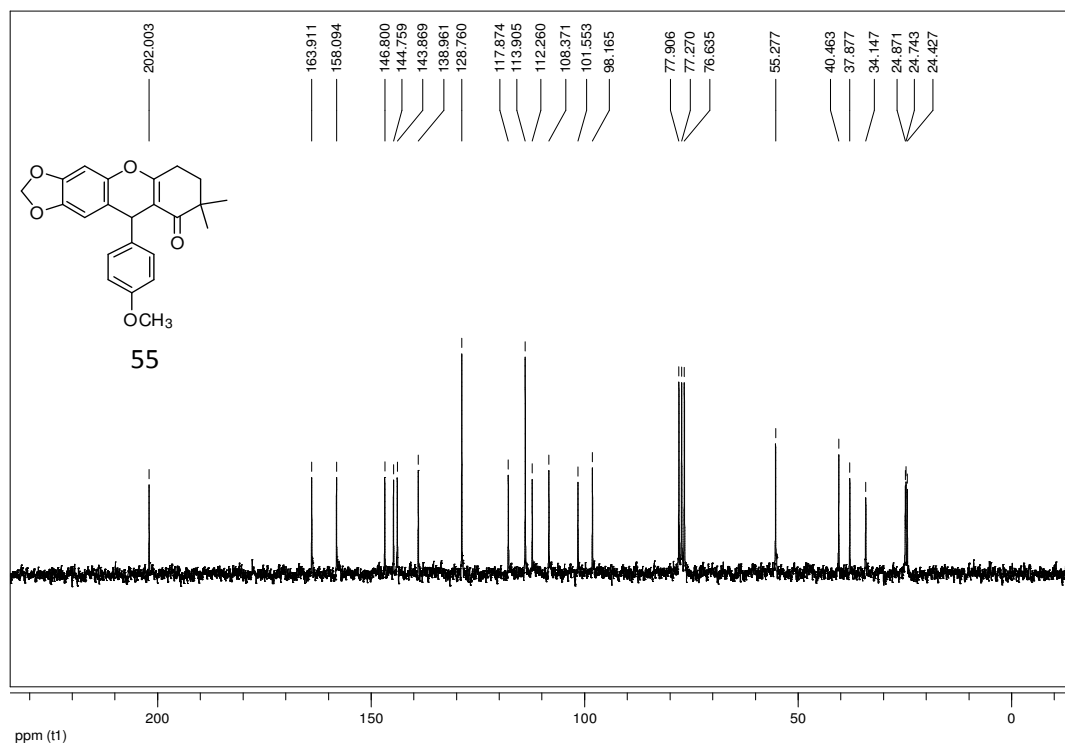

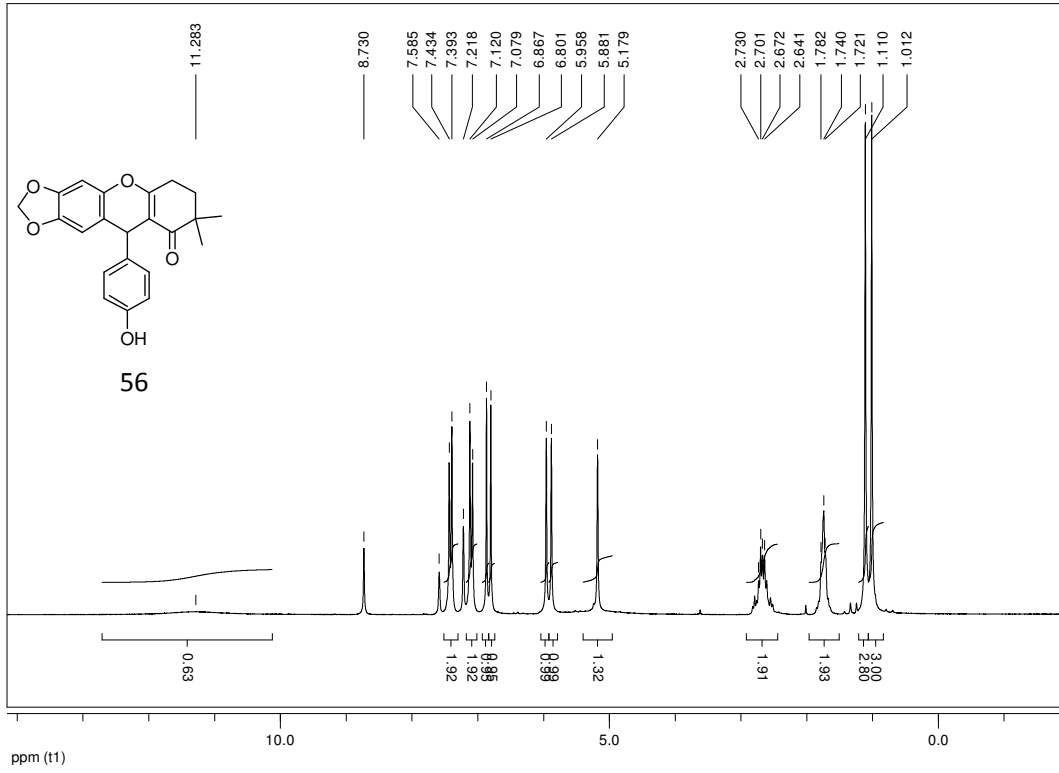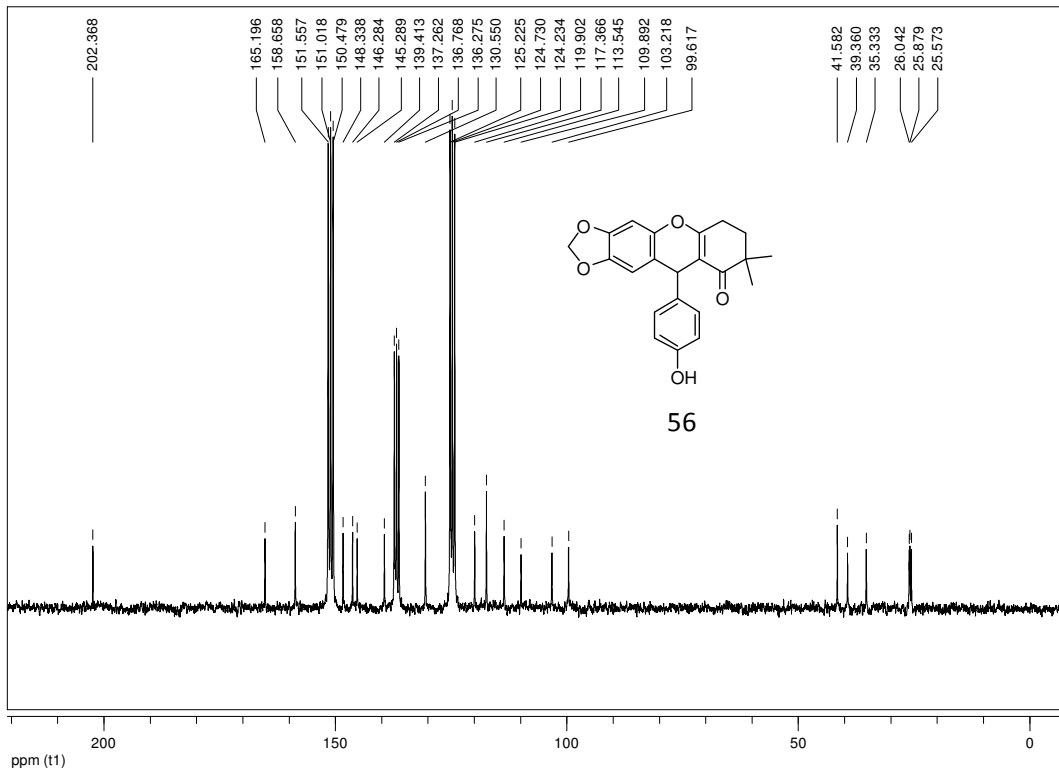

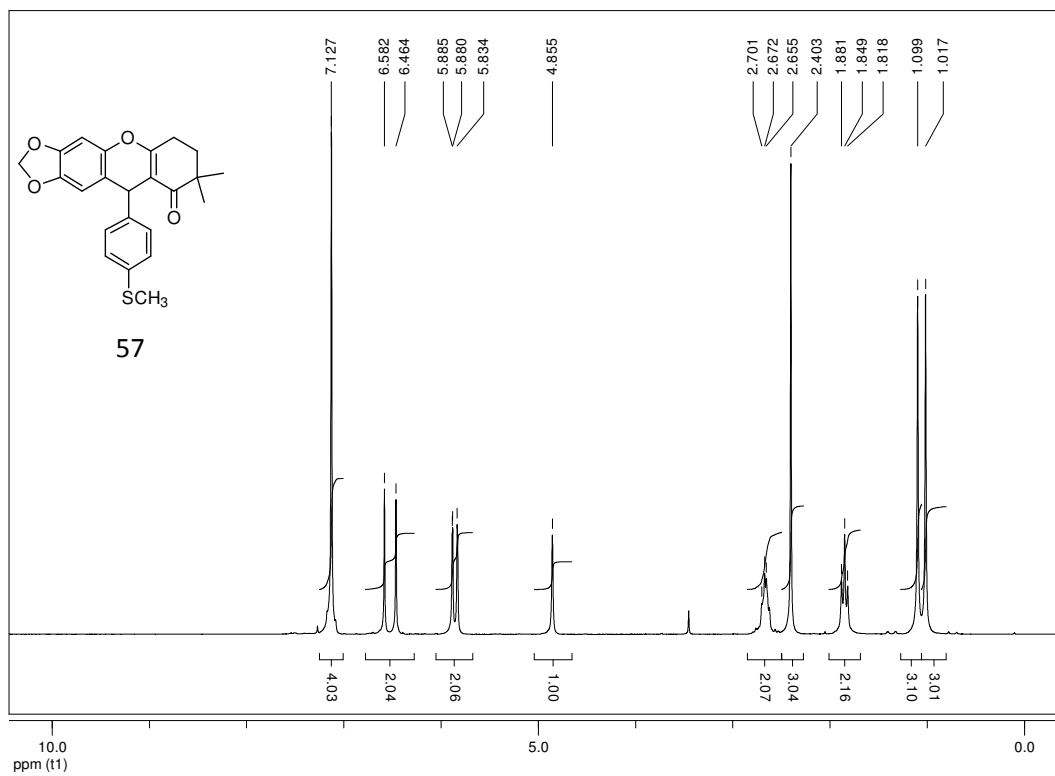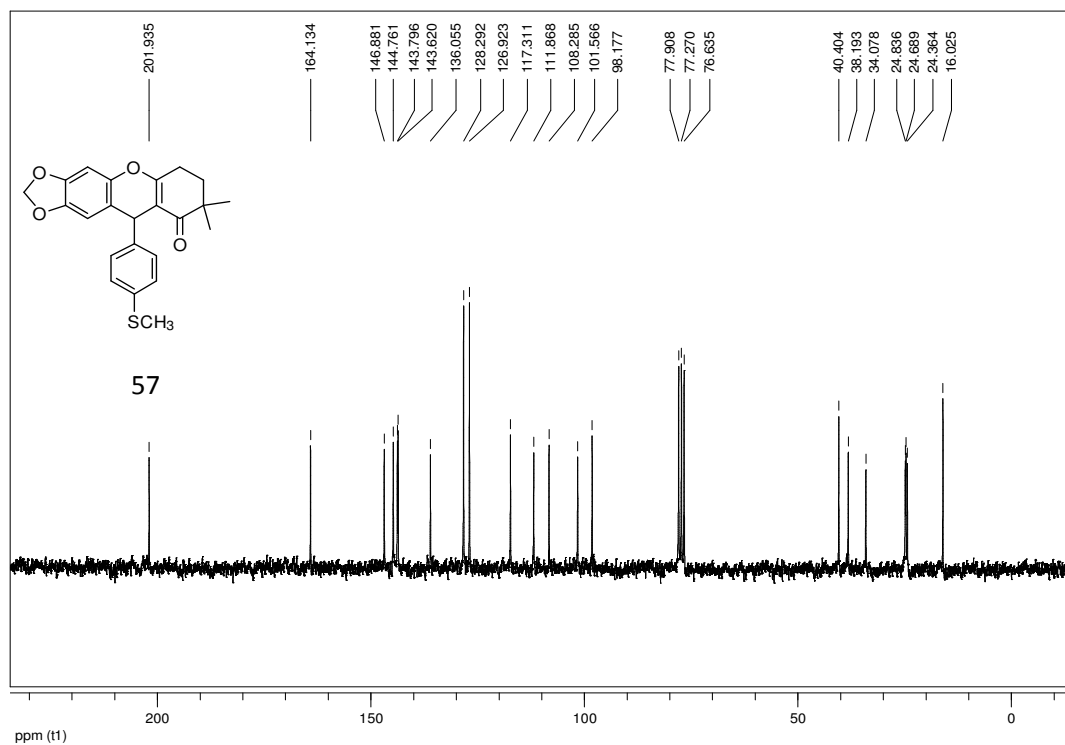

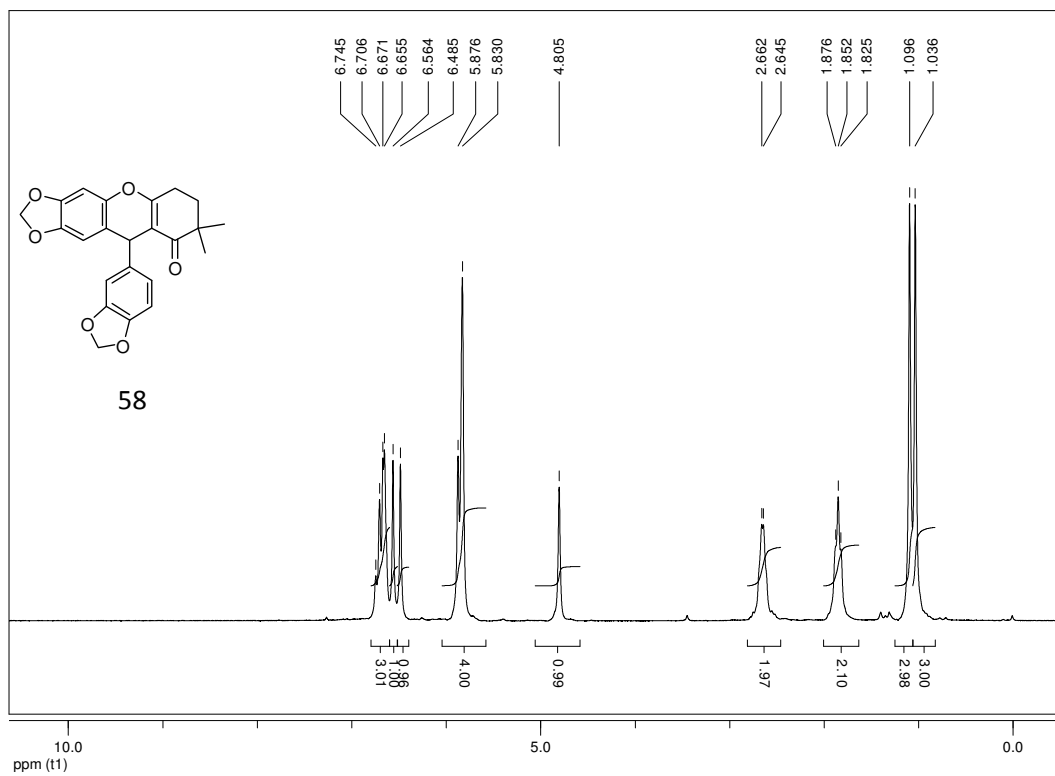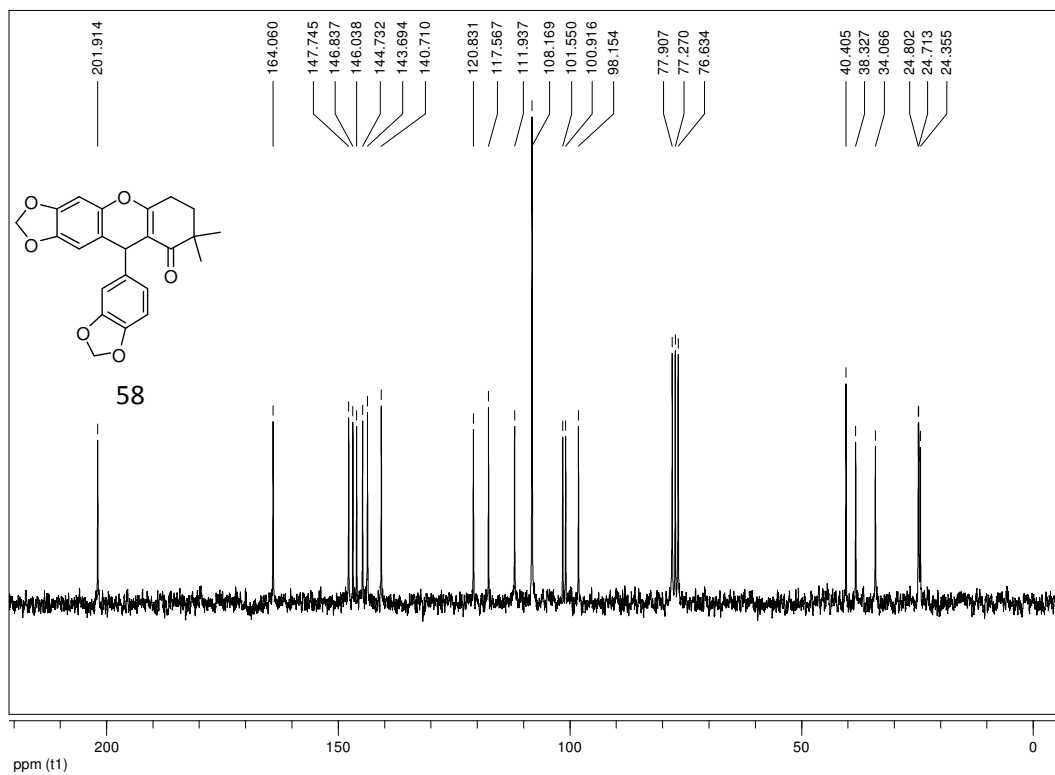



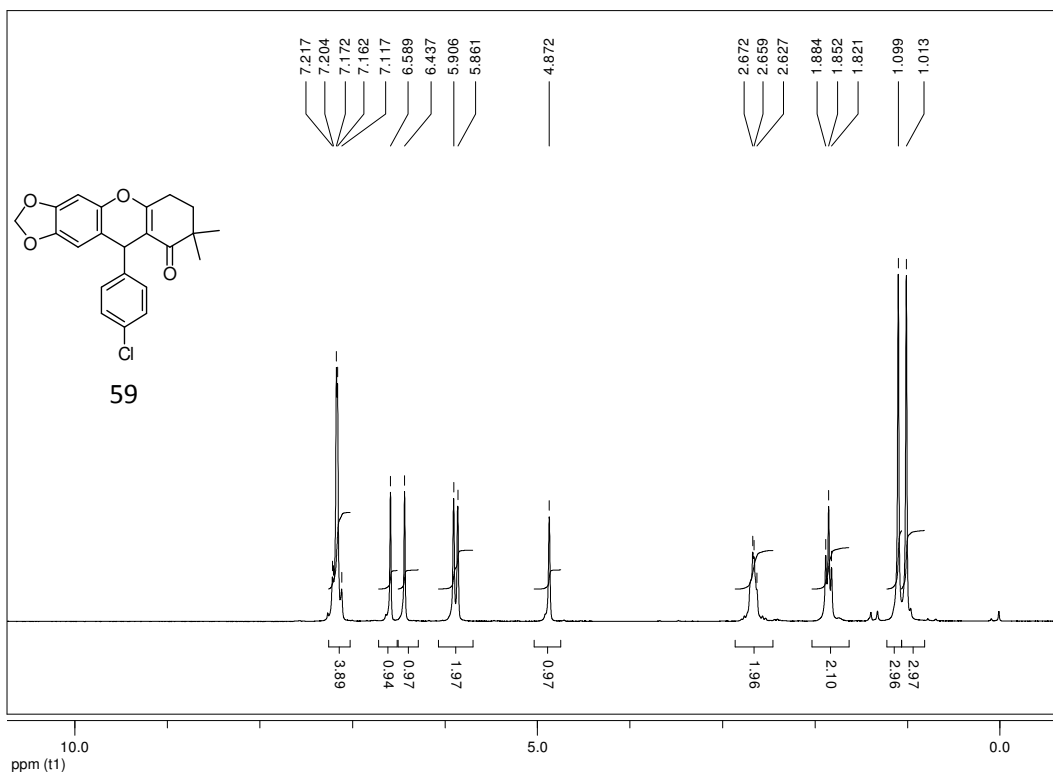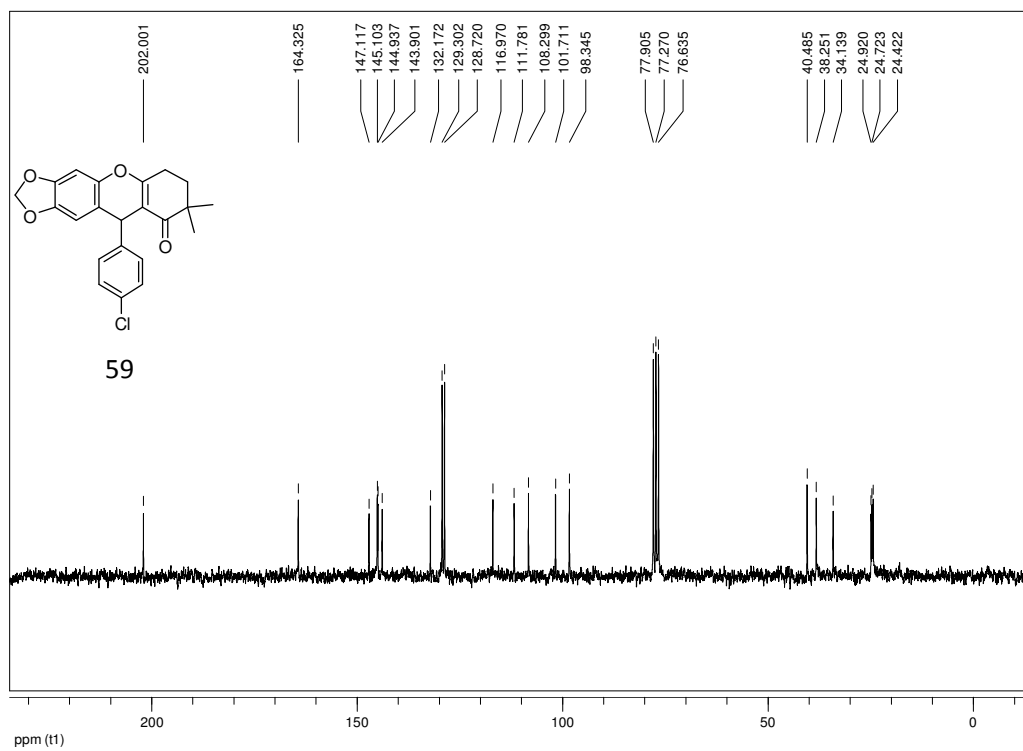

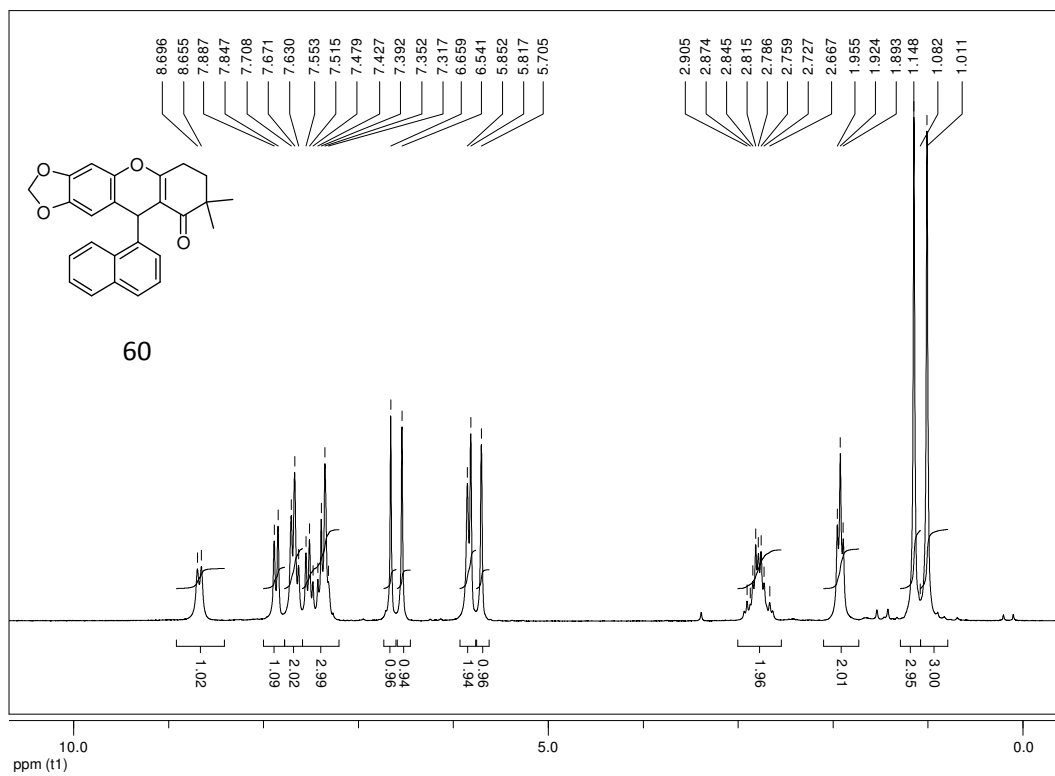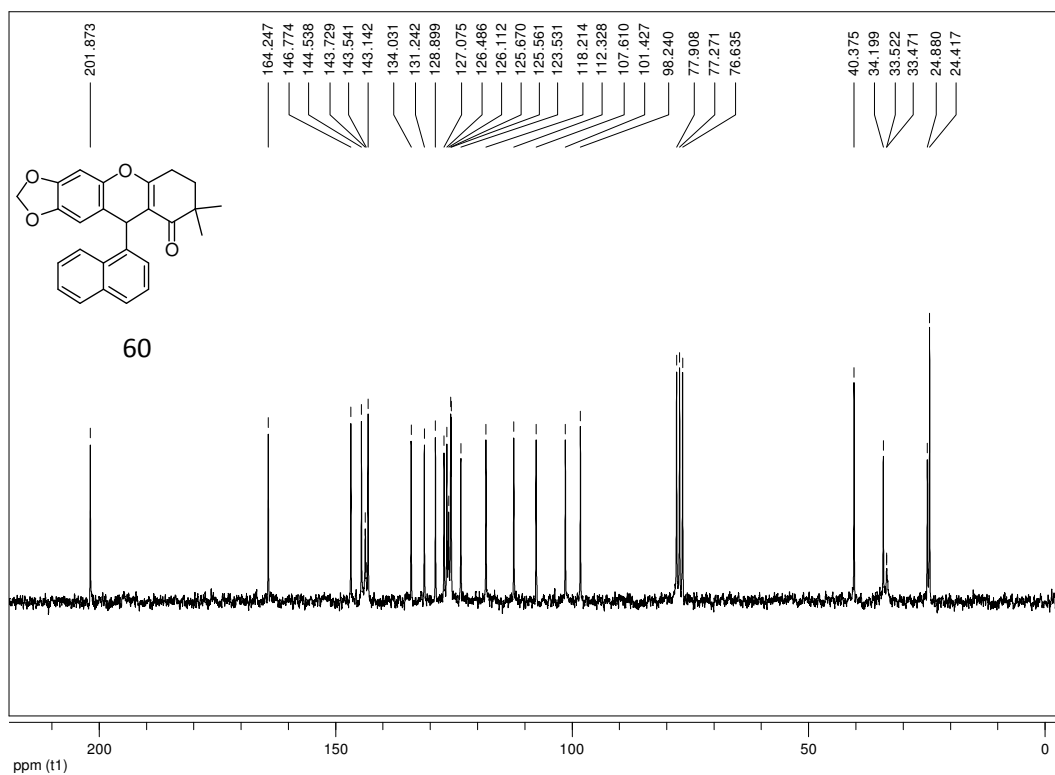

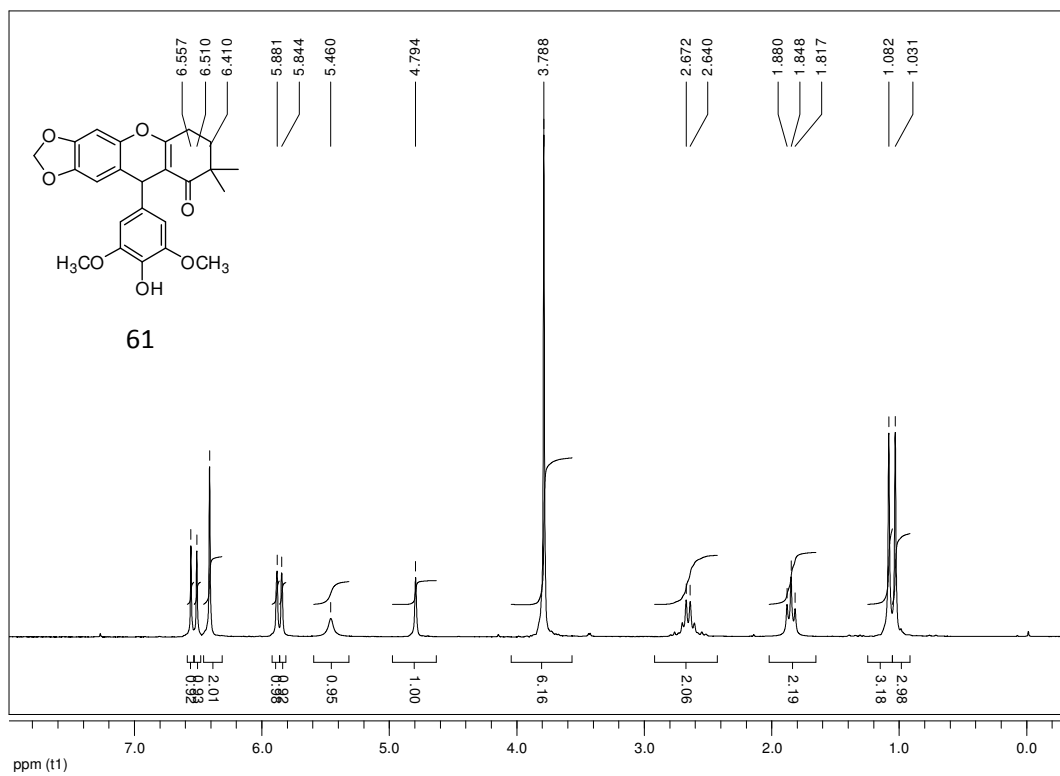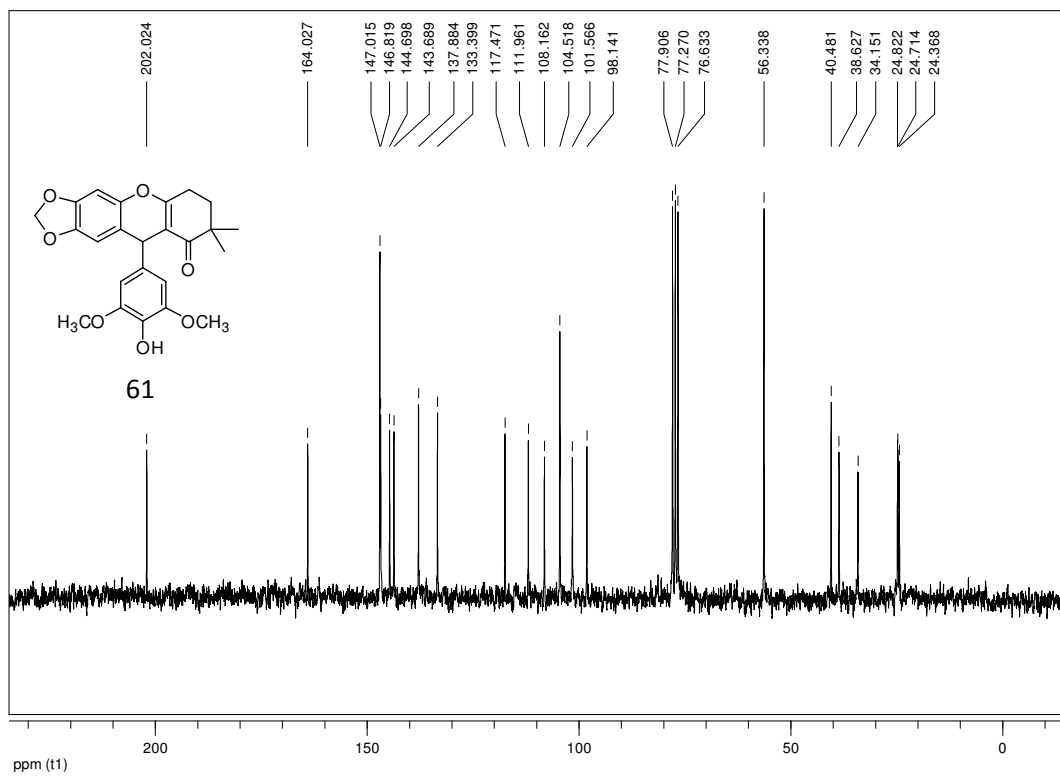

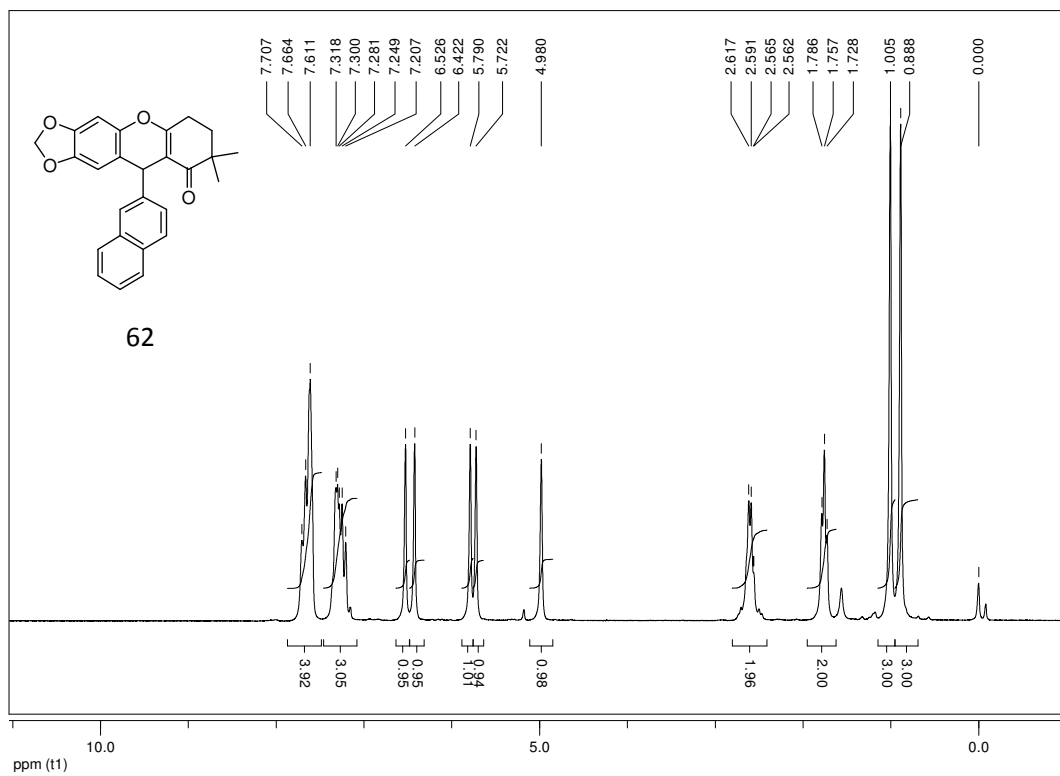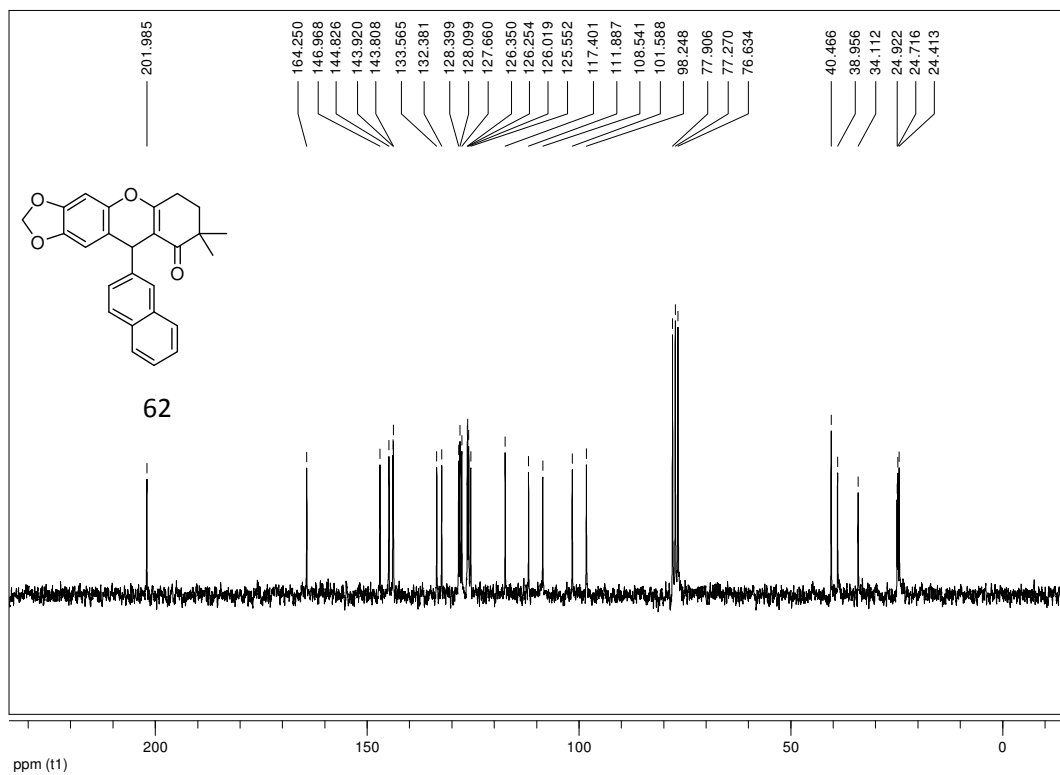

Supplement: c4ob02611j1.pdf [file c4ob02611j1.pdf]
