# Supplementary material for: Xanthenones: calixarenes-catalyzed syntheses, anticancer activity and QSAR studies
Source: Royal Society of Chemistry journal article supplement (doi:10.1039/c4ob02611j), 2015-01-01
Supplement: c4ob02611j2.pdf [file c4ob02611j2.pdf]

## Supporting Information

### **Xanthenones: Calixarenes-catalyzed Syntheses, Anticancer Activity and QSAR Studies**

**Daniel Leite da Silva,<sup>a</sup> Bruna Silva Terra,<sup>a</sup> Mateus Ribeiro Lage,<sup>b</sup> Ana Lúcia Tasca Góis Ruiz,<sup>c</sup> Cameron Capeletti da Silva,<sup>d</sup> João Ernesto de Carvalho,<sup>c</sup> José Walkimar de Mesquita Carneiro,<sup>b</sup> Felipe Terra Martins,<sup>d</sup> Sergio Antonio Fernandes,<sup>e</sup> and Ângelo de Fátima,<sup>\*a</sup>**

<sup>a</sup> Grupo de Estudos em Química Orgânica e Biológica (GEQOB), Departamento de Química, ICEx, Universidade Federal de Minas Gerais, Belo Horizonte, MG, 31270-901, Brazil. Fax: +55-31-3409-5700; Tel: +55-31-3409-6373; E-mail: adefatima@qui.ufmg.br

<sup>b</sup> Instituto de Química, Universidade Federal Fluminense, Campus do Valonguinho, Niterói, RJ, Brazil.

<sup>c</sup> Centro Pluridisciplinar de Pesquisas Químicas, Biológicas e Agrícolas (CPQBA), Universidade Estadual de Campinas, Paulínia, SP, Brazil

<sup>d</sup> Instituto de Química, Universidade Federal de Goiás, Goiânia, GO, Brazil

<sup>e</sup> Grupo de Química Supramolecular e Biomimética (GQSB), Departamento de Química, Universidade Federal de Viçosa, Viçosa, Minas Gerais, Brazil

#### **Table of contents**

| <b>Contents</b>                                                                                                                                                                                    | <b>Page No.</b> |
|----------------------------------------------------------------------------------------------------------------------------------------------------------------------------------------------------|-----------------|
| <b>Table S1.</b> Crystal data and structure refinement results for xanthenone 4                                                                                                                    | S2              |
| <b>Table S2.</b> Concentration of xanthenones <b>4-62</b> (GI50 <sup>a</sup> in µg/mL) that elicits cancer cells <sup>b</sup> growth inhibition by 50% and the selective index (SI) <sup>c</sup> . | S3-S4           |
| Data of xanthenones <b>4-62</b> characterization                                                                                                                                                   | S5-S14          |

**Table S1.** Crystal data and structure refinement results for xanthenone **4**.

|                                                            |              |                                                               |
|------------------------------------------------------------|--------------|---------------------------------------------------------------|
| structural formula                                         |              | C <sub>25</sub> H <sub>21</sub> F <sub>1</sub> O <sub>2</sub> |
| fw (g/mol)                                                 |              | 372.42                                                        |
| cryst syst                                                 |              | Triclinic                                                     |
| space group                                                |              | <i>P</i> 1                                                    |
| <i>Z</i> / <i>Z</i> '                                      |              | 2 / 2                                                         |
| <i>T</i> (K)                                               |              | 150(2)                                                        |
| unit cell dimensions                                       | <i>a</i> (Å) | 6.0244(4)                                                     |
|                                                            | <i>b</i> (Å) | 11.8440(9)                                                    |
|                                                            | <i>c</i> (Å) | 13.2700(13)                                                   |
|                                                            | ∠(°)         | 93.58(2)                                                      |
|                                                            | ∠(°)         | 94.51(2)                                                      |
|                                                            | ∠(°)         | 94.85(5)                                                      |
| <i>V</i> (Å <sup>3</sup> )                                 |              | 938.27 (16)                                                   |
| calculated density (Mg/m <sup>3</sup> )                    |              | 1.318                                                         |
| absorption coefficient ∫ (mm <sup>-1</sup> )               |              | 0.089                                                         |
| <i>q</i> range for data collection (°)                     |              | 3.09 – 25.68                                                  |
| index ranges                                               | <i>H</i>     | -7 to 6                                                       |
|                                                            | <i>K</i>     | -14 to 14                                                     |
|                                                            | <i>L</i>     | -16 to 16                                                     |
| data collected                                             |              | 6497                                                          |
| unique reflections                                         |              | 3497                                                          |
| unique reflections with <i>I</i> > 2∫( <i>I</i> )          |              | 3042                                                          |
| symmetry factor ( <i>R</i> <sub>int</sub> )                |              | 0.0618                                                        |
| completeness to ∫ <sub>max</sub> (%)                       |              | 98.0                                                          |
| <i>F</i> (000)                                             |              | 392                                                           |
| parameters refined                                         |              | 509                                                           |
| goodness-of-fit on <i>F</i> <sup>2</sup>                   |              | 1.065                                                         |
| <i>R</i> <sub>1</sub> factor for <i>I</i> > 2∫( <i>I</i> ) |              | 0.0788                                                        |
| <i>wR</i> <sub>2</sub> factor for all data                 |              | 0.2343                                                        |
| largest diff. peak / hole (e/Å <sup>3</sup> )              |              | 0.563/-0.363                                                  |
| CCDC deposit number                                        |              | 1002985                                                       |

**Table S2.** Selective index (SI)<sup>a</sup> and concentration of synthesized xanthenones (GI<sub>50</sub><sup>b</sup> in µg/mL) that elicits cancer cells<sup>c</sup> growth inhibition by 50%.

| Group | Xanthenone | U251             |      | MCF7             |      | NCI-ADR/RES      |      | 786-0            |       | NCI-H460         |      | HT-29            |       | HaCaT            |
|-------|------------|------------------|------|------------------|------|------------------|------|------------------|-------|------------------|------|------------------|-------|------------------|
|       |            | GI <sub>50</sub> | SI    | GI <sub>50</sub> | SI   | GI <sub>50</sub> | SI    | GI <sub>50</sub> |
| 1     | 4          | 186.6            | 0.2  | 203.7            | 0.2  | 2.0              | 16.1 | 3.1              | 10.3  | 36.3             | 0.9  | >250             | <0.1  | 32.1             |
| 1     | 5          | 56.8             | 0.8  | 92.0             | 0.5  | 0.03             | 1626 | 28.9             | 1.5   | 85.8             | 0.5  | >250             | <0.2  | 43.9             |
| 1     | 6          | >250             | <0.4 | 61.4             | 1.6  | >250             | <0.4 | 2.8              | 35.3  | 81.7             | 1.2  | >250             | 0.4   | 98.9             |
| 1     | 7          | 29.8             | 1.8  | 56.9             | 1.0  | 0.77             | 70.3 | >250             | <0.2  | 50.5             | 1.1  | >250             | <0.2  | 54.1             |
| 1     | 8          | 28.5             | 0.9  | 2.0              | 12.9 | 227.9            | 0.1  | 1.7              | 15.1  | 28.7             | 0.9  | 48.2             | 0.5   | 25.7             |
| 1     | 9          | 25.6             | 0.9  | 5.2              | 4.5  | 0.7              | 33.3 | 27.1             | 0.9   | 31.4             | 0.7  | 29.9             | 0.8   | 23.3             |
| 1     | 10         | 29.5             | 0.8  | 26.5             | 0.9  | 2.6              | 9.4  | 81.8             | 0.3   | 50.7             | 0.5  | 69.6             | 0.4   | 24.4             |
| 1     | 11         | 14.0             | 3.8  | >250             | <0.2 | 67.5             | 0.8  | 225.4            | 0.2   | >250             | <0.2 | >250             | <0.2  | 52.9             |
| 1     | 12         | 85.6             | 0.6  | 39.6             | 1.2  | 1.7              | 27.9 | 105.2            | 0.5   | 106.9            | 0.4  | >250             | <0.19 | 47.5             |
| 1     | 13         | 2.9              | 2.1  | 2.6              | 2.3  | 0.4              | 15.2 | 216.0            | 0.03  | 2.8              | 2.2  | 3.2              | 1.9   | 6.1              |
| 1     | 14         | 2.9              | 2.0  | 2.7              | 2.1  | 6.7              | 0.9  | >250             | <0.02 | 13.1             | 0.4  | 3.2              | 1.8   | 5.8              |
| 1     | 15         | 2.9              | 6.9  | 3.9              | 5.2  | 0.3              | 67.0 | 29.8             | 0.7   | 2.6              | 7.7  | 3.4              | 5.9   | 20.1             |
| 1     | 16         | 94.0             | 2.7  | 100.3            | 2.5  | 0.4              | 625  | 197.4            | 1.3   | 119.9            | 2.1  | >250             | -     | >250             |
| 1     | 17         | 187.7            | 1.3  | 132.5            | 1.9  | 6.1              | 41.0 | >250             | -     | 124.3            | 2.0  | >250             | -     | >250             |
| 1     | 18         | >250             | -    | 242.4            | 1.0  | 41.9             | 6.0  | >250             | -     | >250             | -    | >250             | -     | >250             |
| 1     | 19         | 164.3            | 1.4  | 39.3             | 6.0  | >250             | <0.9 | >250             | <0.9  | 183.5            | 1.3  | >250             | <0.9  | 235.7            |
| 1     | 20         | 6.5              | 4.4  | 21.5             | 1.3  | 8.9              | 3.2  | 20.4             | 1.4   | 19.6             | 1.4  | 16.0             | 1.8   | 28.4             |
| 1     | 21         | 84.5             | 2.4  | 127.0            | 1.6  | 51.9             | 3.9  | 246.3            | 0.8   | >250             | <0.8 | >250             | <0.8  | 204.6            |
| 1     | 22         | 76.9             | 0.9  | 31.0             | 2.2  | 9.8              | 6.9  | >250             | <0.3  | 104.1            | 0.6  | 199.0            | 0.3   | 67.2             |
| 1     | 23         | 35.1             | 1.0  | 82.4             | 0.4  | 0.1              | 341  | 188.3            | 0.2   | 60.3             | 0.6  | 95.9             | 0.4   | 34.1             |
| 1     | 24         | 25.1             | 0.6  | 8.8              | 1.8  | 4.4              | 3.5  | 76.6             | 0.2   | 44.2             | 0.3  | 16.2             | 1.0   | 15.4             |
| 1     | 25         | 81.8             | 0.8  | 16.0             | 4.3  | 6.7              | 10.4 | 155.7            | 0.4   | 63.0             | 1.1  | >250             | 0.3   | 69.5             |
| 1     | 26         | >250             | -    | 128.9            | 1.9  | >250             | -    | >250             | -     | >250             | -    | >250             | -     | >250             |
| 1     | 27         | 27.2             | 0.7  | 25.1             | 0.8  | 34.7             | 0.6  | 30.1             | 0.7   | 46.0             | 0.4  | 128.4            | 0.2   | 20.2             |
| 1     | 28         | >250             | <0.8 | 97.9             | 2.1  | 19.1             | 10.6 | >250             | <0.8  | >250             | <0.8 | >250             | <0.8  | 202.3            |
| 1     | 29         | 2.9              | 2.4  | 2.8              | 2.5  | 0.4              | 17.8 | 4.9              | 1.4   | 4.3              | 1.7  | 2.9              | 2.4   | 7.1              |
| 1     | 30         | >250             | -    | 62.6             | 4.0  | 11.5             | 21.7 | >250             | -     | >250             | -    | 165.7            | 1.5   | >250             |
| 1     | 31         | >250             | <0.5 | 98.7             | 1.3  | 3.0              | 41.1 | >250             | <0.5  | >250             | <0.5 | >250             | <0.5  | 123.4            |
| 1     | 32         | 70.2             | 1.0  | 18.8             | 3.7  | 3.1              | 22.5 | 172.8            | 0.4   | >250             | <0.3 | 33.8             | 2.1   | 69.8             |
| 2     | 33         | 125.2            | >2.0 | 29.6             | >8.4 | 25.7             | >9.7 | 63.5             | >3.9  | 115.5            | >2.2 | >250             | -     | >250             |
| 2     | 34         | 189.6            | >1.3 | 202.9            | >1.2 | 95.1             | >2.6 | 229.8            | >1.1  | >250             | -    | 218.6            | >1.1  | >250             |
| 2     | 35         | >250             | -    | >250             | -    | >250             | -    | >250             | -     | >250             | -    | >250             | -     | >250             |
| 2     | 36         | 25.2             | 1.1  | 24.4             | 1.1  | 9.3              | 2.9  | 26.2             | 1.0   | 24.3             | 1.1  | 19.4             | 1.4   | 26.6             |
| 2     | 37         | 14.2             | 2.8  | 14.0             | 2.9  | 26.4             | 1.5  | 33.4             | 1.2   | 30.9             | 1.3  | 25.7             | 1.6   | 40.4             |
| 2     | 38         | 95.3             | 2.6  | >250             | <1.0 | 67.1             | 3.7  | >250             | <1.0  | >250             | <1.0 | >250             | <1.0  | 247.8            |
| 2     | 39         | 37.2             | 0.3  | 5.7              | 2.3  | 7.2              | 1.8  | 110.3            | 0.1   | 27.8             | 0.5  | 4.9              | 2.6   | 12.9             |
| 2     | 40         | 7.17             | 1.4  | 5.4              | 1.9  | 60.3             | 0.2  | 23.2             | 0.4   | 19.4             | 0.5  | 29.1             | 0.3   | 10.0             |
| 2     | 41         | 3.4              | 1.2  | 3.0              | 1.3  | 4.9              | 0.8  | 4.0              | 1.0   | 5.0              | 0.8  | 3.5              | 1.1   | 4.0              |
| 2     | 42         | >250             | -    | >250             | -    | >250             | -    | >250             | -     | >250             | -    | >250             | -     | >250             |
| 2     | 43         | 29.5             | 1.1  | 26.3             | 1.2  | 8.6              | 3.8  | 28.5             | 1.1   | 26.1             | 1.2  | 25.1             | 1.3   | 32.6             |
| 2     | 44         | 57.9             | 0.8  | 21.2             | 2.2  | 22.6             | 2.0  | 51.2             | 0.9   | 26.7             | 1.7  | 39.2             | 1.2   | 46.2             |
| 2     | 45         | 5.3              | 0.8  | 3.2              | 1.3  | 5.4              | 0.8  | 25.0             | 0.1   | 10.5             | 0.4  | 2.6              | 1.7   | 4.3              |
| 2     | 46         | 211.8            | >1.1 | >250             | -    | >250             | -    | >250             | -     | 243.2            | >1.0 | >250             | -     | >250             |
| 2     | 47         | 25.9             | 1.0  | 25.0             | 1.1  | 24.8             | 1.1  | 53.9             | 0.5   | 25.8             | 1.0  | 26.1             | 1.0   | 26.4             |
| 2     | 48         | 0.7              | 1.1  | 0.7              | 1.1  | 0.5              | 1.6  | 2.2              | 0.4   | 2.3              | 0.3  | 0.43             | 1.9   | 0.80             |
| 2     | 49         | 3.3              | 0.8  | 2.2              | 1.3  | 1.6              | 1.8  | 7.1              | 0.4   | 7.3              | 0.4  | 2.7              | 1.0   | 2.8              |
| 2     | 50         | 32.1             | 2.4  | 21.7             | 3.5  | 10.1             | 7.6  | 81.4             | 0.9   | 75.4             | 1.0  | 118.4            | 0.7   | 77.0             |
| 2     | 51         | 32.8             | 1.0  | 52.8             | 0.6  | 27.7             | 1.2  | 83.2             | 0.4   | 28.9             | 1.1  | 28.9             | 1.1   | 32.1             |
| 2     | 52         | >250             | -    | >250             | -    | >250             | -    | >250             | -     | >250             | -    | >250             | -     | >250             |
| 2     | 53         | 26.2             | 1.0  | 24.5             | 1.1  | 26.4             | 1.0  | 29.4             | 0.9   | 24.7             | 1.1  | 23.4             | 1.1   | 26.5             |
| 2     | 54         | >250             | <0.6 | 214.1            | 0.7  | 77.8             | 2.0  | >250             | <0.6  | >250             | <0.6 | 19.1             | 8.1   | 155.6            |
| 2     | 55         | 18.9             | 3.3  | 8.9              | 7.0  | 38.3             | 1.6  | 70.6             | 0.9   | 34.3             | 1.8  | 7.0              | 8.8   | 61.9             |
| 2     | 56         | 3.3              | 1.1  | 2.9              | 1.2  | 12.9             | 0.3  | >250             | <0.01 | 3.1              | 1.1  | 2.7              | 1.3   | 3.5              |
| 2     | 57         | 88.5             | 0.6  | 59.1             | 0.9  | 56.8             | 0.9  | 56.2             | 0.9   | 44.4             | 1.2  | 92.5             | 0.6   | 53.3             |
| 2     | 58         | >250             | -    | >250             | -    | >250             | -    | >250             | -     | 109.9            | >2.3 | >250             | -     | >250             |

|   |                        |       |     |      |     |       |     |      |      |       |      |       |     |       |
|---|------------------------|-------|-----|------|-----|-------|-----|------|------|-------|------|-------|-----|-------|
| 2 | <b>59</b>              | 29.1  | 1.0 | 41.8 | 0.7 | 28.0  | 1.0 | >250 | <0.1 | 26.8  | 1.1  | 28.5  | 1.0 | 28.2  |
| 2 | <b>60</b>              | 175.3 | 0.6 | 66.1 | 1.6 | 181.7 | 0.6 | 29.4 | 3.5  | 103.0 | 1.0  | 174.0 | 0.6 | 103.5 |
| 2 | <b>61</b>              | 24.6  | 0.4 | 8.1  | 1.3 | 24.3  | 0.4 | 70.6 | 0.2  | 10.7  | 1.0  | 7.5   | 1.4 | 10.7  |
| 2 | <b>62</b>              | 30.0  | 1.0 | 28.3 | 1.0 | 63.4  | 0.5 | 56.2 | 0.5  | 27.8  | 1.0  | 27.7  | 1.1 | 29.2  |
| - | <b>Dox<sup>d</sup></b> | 0.03  | 7.4 | 0.06 | 3.4 | 0.05  | 4.0 | 0.04 | 5.3  | 0.01  | 15.4 | 0.08  | 2.4 | 0.2   |

<sup>a</sup>Selectivity index was determined as the ratio of the GI<sub>50</sub> for HaCat to the GI<sub>50</sub> for the cancer cell line. <sup>b</sup>GI<sub>50</sub> values were obtained from two independent experiments, each done in triplicate. <sup>c</sup>U251, glioma cells; MCF7, breast; NCI-ADR/RES, multiple drug-resistant ovarian cancer cells; 786-0, renal cancer cells; NCI-H460, non-small lung cancer cells; HT-29, colon cancer cells; HaCaT, keratinocyte. <sup>d</sup>Reference drug.

**9,9-Dimethyl-12-(4-florophenyl)-8,9,10,12-tetrahydro-11H-benzo[a]xanthen-11-one (4).** Yield (79%) as a white solid; mp 183-185 °C; <sup>1</sup>H NMR (200 MHz, CDCl<sub>3</sub>): δ<sub>H</sub> (ppm) 7.91 (1H, d, *J* = 8.0 Hz, Ar-H), 7.80-7.62 (3H, m, Ar-H), 7.48-7.20 (5H, m, Ar-H), 6.98-6.72 (3H, m, Ar-H), 5.69 (1H, s, CH), 2.50 (2H, s, CH<sub>2</sub>), 2.26-2.17 (2H, m, CH<sub>2</sub>), 1.06 (3H, s, CH<sub>3</sub>), 0.91 (3H, s, CH<sub>3</sub>). <sup>13</sup>C NMR (50 MHz, CDCl<sub>3</sub>): δ<sub>C</sub> (ppm) 197.0 (C=O), 164.1 (C), 161.3 (d, *J*<sub>C-F</sub> = 244.8 Hz, C), 147.8 (C), 140.7 (d, *J*<sub>C-F</sub> = 2.11 Hz, C), 131.6 (C), 131.4 (C), 130.1 (d, *J*<sub>C-F</sub> = 8.1 Hz, 2xCH), 130.0 (CH), 129.1 (CH), 128.6 (CH), 127.2 (CH), 125.1 (CH), 123.6 (CH), 117.5 (C), 117.2 (CH), 115.4 (d, *J*<sub>C-F</sub> = 21.1 Hz, 2xCH), 114.2 (C), 51.0 (CH<sub>2</sub>), 41.4 (CH<sub>2</sub>), 34.1 (C), 32.3 (CH), 29.4 (CH<sub>3</sub>), 27.1 (CH<sub>3</sub>); IR (KBr) (ν<sub>max</sub> /cm<sup>-1</sup>): 3070, 3050, 2964, 2942, 1654, 1638, 1596, 1506, 1378, 1226, 1182, 1030, 746, 538, 498; HRMS (ESI) *m/z* calcd for C<sub>25</sub>H<sub>21</sub>FO<sub>2</sub> (M+H)<sup>+</sup> 373.1598, found 373.1596.

**9,9-Dimethyl-12-(phenyl)-8,9,10,12-tetrahydrobenzo[a]xanthen-11-one (5).** Yield (73%) as a white solid; mp 147-148 °C; <sup>1</sup>H NMR (200 MHz, CDCl<sub>3</sub>): δ<sub>H</sub> (ppm) 7.98 (1H, d, *J* = 7.6 Hz, Ar-H), 7.85-7.60 (2H, m, Ar-H), 7.50-7.25 (5H, m, Ar-H), 7.23-6.93 (3H, m, Ar-H), 5.70 (1H, s, CH), 2.51 (2H, s, CH<sub>2</sub>), 2.28-2.19 (2H, m, CH<sub>2</sub>), 1.06 (3H, s, CH<sub>3</sub>), 0.91 (3H, s, CH<sub>3</sub>). <sup>13</sup>C NMR (50 MHz, CDCl<sub>3</sub>): δ<sub>C</sub> (ppm) 197.0 (C=O), 164.0 (C), 147.9 (C), 144.9 (C), 131.7 (C), 131.6 (C), 129.0 (CH), 128.6 (3xCH), 128.4 (2xCH), 127.2 (CH), 126.4 (CH), 125.0 (CH), 123.8 (CH), 117.8 (C), 117.2 (CH), 114.4 (C), 51.0 (CH<sub>2</sub>), 41.5 (CH<sub>2</sub>), 34.9 (CH), 32.4 (C), 29.5 (CH<sub>3</sub>), 27.3 (CH<sub>3</sub>); IR (KBr) (ν<sub>max</sub> /cm<sup>-1</sup>): 3056, 3024, 2956, 2886, 2834, 1650, 1596, 1506, 1376, 1228, 1184, 1028, 808, 746, 698, 536, 512; HRMS (ESI) *m/z* calcd for C<sub>25</sub>H<sub>22</sub>O<sub>2</sub> (M+H)<sup>+</sup> 355.1693, found 355.1677.

**9,9-Dimethyl-12-(4-(methylthio)phenyl)-8,9,10,12-tetrahydro-11H-benzo[a]xanthen-11-one (6).** Yield (68%) as a white solid; mp 167-169 °C; <sup>1</sup>H NMR (200 MHz, CDCl<sub>3</sub>): δ<sub>H</sub> (ppm) 7.94 (1H, d, *J* = 8.0 Hz, Ar-H), 7.82-7.58 (2H, m, Ar-H), 7.35-7.12 (m, 3H, Ar-H), 7.30 (d, 2H, *J* = 8.3 Hz, Ar-H), 7.04 (2H, d, *J* = 8.3 Hz, Ar-H), 5.65 (1H, s, CH), 2.52 (2H, s, CH<sub>2</sub>), 2.31 (3H, s, CH<sub>3</sub>), 2.25-2.17 (2H, m, CH<sub>2</sub>), 1.07 (3H, s, CH<sub>3</sub>), 0.93 (3H, s, CH<sub>3</sub>). <sup>13</sup>C NMR (50 MHz, CDCl<sub>3</sub>): δ<sub>C</sub> (ppm) 197.1 (C=O), 164.1 (C), 147.8 (C), 142.0 (C), 136.0 (C), 131.6 (C), 131.4 (C), 129.0 (CHx3), 128.6 (CH), 127.1 (CH), 126.6 (CHx2), 125.1 (CH), 123.7 (CH), 117.6 (C), 117.2 (CH), 114.2 (C), 51.0 (CH<sub>2</sub>), 41.5 (CH<sub>2</sub>), 34.4 (C), 32.4 (CH), 29.4 (CH<sub>3</sub>), 27.3 (CH<sub>3</sub>), 15.9 (CH<sub>3</sub>); IR (KBr) (ν<sub>max</sub> /cm<sup>-1</sup>): 3068, 3014, 2956, 2924, 2874, 1648, 1594, 1490, 1378, 1224, 1164, 1024, 978, 822, 748, 668, 532; HRMS (ESI) *m/z* calcd for C<sub>26</sub>H<sub>24</sub>SO<sub>2</sub> (M+H)<sup>+</sup> 401.1570, found 401.1625.

**9,9-Dimethyl-12-(3-methoxyphenyl)-8,9,10,12-tetrahydro-11H-benzo[a]xanthen-11-one (7).** Yield (64%) as a yellow solid; mp. 194-196 °C; <sup>1</sup>H NMR (200 MHz, CDCl<sub>3</sub>): δ<sub>H</sub> (ppm) 7.79 (1H, d, *J* = 7.7 Hz, Ar-H), 7.72 (2H, bs, Ar-H), 7.50-7.19 (3H, m, Ar-H), 7.14-6.81 (3H, m, Ar-H), 6.57 (1H, d, *J* = 7.7 Hz, Ar-H), 5.69 (1H, s, CH), 3.67 (3H, s, CH<sub>3</sub>), 2.52 (2H, s, CH<sub>2</sub>), 2.24-2.18 (2H, m, CH<sub>2</sub>), 1.07 (3H, s, CH<sub>3</sub>), 0.94 (3H, s, CH<sub>3</sub>). <sup>13</sup>C NMR (50 MHz, CDCl<sub>3</sub>): δ<sub>C</sub> (ppm)

197.0 (C=O), 164.1 (C), 159.6 (C), 147.9 (C), 146.5 (C), 131.6 (C), 129.3 (CH), 129.0 (CH), 128.5 (CH), 127.2 (CH), 125.0 (CH), 123.8 (2xCH), 121.0 (CH), 117.7 (C), 117.2 (C), 114.8 (CH), 114.3 (C), 111.4 (CH), 55.2 (CH<sub>3</sub>), 51.1 (CH<sub>2</sub>), 41.5 (CH<sub>2</sub>), 34.8 (CH), 32.4 (C), 29.4 (CH<sub>3</sub>), 27.4 (CH<sub>3</sub>); IR (KBr) ( $\nu_{\max}$  /cm<sup>-1</sup>): 3056, 3010, 2958, 2884, 2834, 1648, 1596, 1488, 1376, 1320, 1274, 1232, 1046, 828, 752, 698, 526, 486; HRMS (ESI)  $m/z$  calcd for C<sub>26</sub>H<sub>24</sub>O<sub>3</sub> (M+H)<sup>+</sup> 385.1798, found 385.1844

**9,9-Dimethyl-12-(benzo[d][1,3]dioxol-5-yl)-8,9,10,12-tetrahydro-11H-benzo[a]xanthen-11-one (8).** Yield (71%) as a white solid; mp 193-196 °C; <sup>1</sup>H NMR (200 MHz, CDCl<sub>3</sub>):  $\delta_{\text{H}}$  (ppm) 7.97 (1H, d,  $J$  = 8.0 Hz), 7.69 (2H, m, Ar-H), 7.51-7.18 (3H, m, Ar-H), 6.96-6.71 (m, 2H, Ar-H), 6.59 (2H, d,  $J$  = 8.3 Hz, Ar-H) 5.73 (2H, d,  $J$  = 8.3 Hz), 5.63 (1H, s, CH), 2.50 (2H, s, CH<sub>2</sub>), 2.37-2.21 (2H, m, CH<sub>2</sub>), 1.06 (3H, s, CH<sub>3</sub>), 0.95 (3H, s, CH<sub>3</sub>). <sup>13</sup>C NMR (50 MHz, CDCl<sub>3</sub>):  $\delta_{\text{C}}$  (ppm) 197.0 (C=O), 163.0 (C), 147.8 (C), 147.6 (C), 145.9 (C), 139.0 (C), 131.6 (C), 131.5 (C), 129.0 (CH), 128.5 (CH), 127.1 (CH), 125.0 (CH), 123.8 (CH), 121.9 (CH), 117.8 (C), 117.2 (CH), 114.3 (C), 109.1 (CH), 108.0 (CH), 100.9 (CH<sub>2</sub>), 51.0 (CH<sub>2</sub>), 41.5 (CH<sub>2</sub>), 34.4 (CH), 32.3 (C), 29.4 (CH<sub>3</sub>), 27.4 (CH<sub>3</sub>); IR (KBr) ( $\nu_{\max}$  /cm<sup>-1</sup>): 3064, 3058, 2960, 2878, 2776, 1644, 1596, 1488, 1438, 1378, 1296, 1226, 1036, 926, 824, 750, 672, 506, 486; HRMS (ESI)  $m/z$  calcd for C<sub>26</sub>H<sub>22</sub>O<sub>4</sub> (M+H)<sup>+</sup> 399.1591, found 399.1642.

**9,9-Dimethyl-12-(pyridin-2-yl)-8,9,10,12-tetrahydro-11H-benzo[a]xanthen-11-one (9).** Yield (67%) as a white solid; mp 156-158 °C; <sup>1</sup>H NMR (200 MHz, CDCl<sub>3</sub>):  $\delta_{\text{H}}$  (ppm) 8.42 (1H, bs, Ar-H), 8.21 (1H, d,  $J$  = 7.5 Hz, Ar-H), 7.92-7.14 (7H, m, Ar-H), 6.92 (1H, bs, ArH), 5.89 (1H, s, CH), 2.61 (2H, s, CH<sub>2</sub>), 2.45-2.06 (2H, m, CH<sub>2</sub>), 1.12 (3H, s, CH<sub>3</sub>), 0.99 (3H, s, CH<sub>3</sub>). <sup>13</sup>C NMR (50 MHz, CDCl<sub>3</sub>):  $\delta_{\text{C}}$  (ppm) 197.0 (C=O), 165.1 (C), 163.0 (C), 149.4 (CH), 147.7 (C), 136.2 (CH), 131.6 (C), 131.4 (C), 128.9 (CH), 128.5 (CH), 127.0 (CH), 124.9 (CH), 123.8 (CH), 123.5 (CH), 121.4 (CH), 117.5 (CH), 117.1 (C), 112.8 (C), 50.9 (CH<sub>2</sub>), 41.5 (CH<sub>2</sub>), 37.8 (CH), 32.4 (C), 29.6 (CH<sub>3</sub>), 27.1 (CH<sub>3</sub>); IR (KBr) ( $\nu_{\max}$  /cm<sup>-1</sup>): 3066, 3056, 3008, 2960, 2888, 1648, 1596, 1518, 1466, 1432, 1376, 1230, 1146, 1028, 856, 822, 754, 662; HRMS (ESI)  $m/z$  calcd for C<sub>24</sub>H<sub>21</sub>NO<sub>2</sub> (M+H)<sup>+</sup> 356.1645, found 356.1670.

**12-(4-Cyanophenyl)-9,9-dimethyl-9,10-dihydro-8H-benzo[a]xanthen-11(12H)-one (10).** Yield (76%) as a white solid; mp 192-195 °C; <sup>1</sup>H NMR (200 MHz, CDCl<sub>3</sub>):  $\delta_{\text{H}}$  (ppm) 7.90-7.70 (3H, m, Ar-H), 7.60-7.30 (7H, m, Ar-H), 5.75 (1H, s, CH), 2.57 (2H, s, CH<sub>2</sub>), 2.28-2.14 (2H, m, CH<sub>2</sub>), 1.12 (3H, s, CH<sub>3</sub>), 0.94 (3H, s, CH<sub>3</sub>). <sup>13</sup>C NMR (50 MHz, CDCl<sub>3</sub>):  $\delta_{\text{C}}$  (ppm) 196.9 (C=O), 164.7 (C), 150.0 (C), 148.0 (C), 132.4 (2xCH), 131.7 (C), 131.2 (C), 129.7 (CH), 129.4 (2xCH), 128.8 (CH), 127.5 (CH), 125.4 (CH), 123.3 (CH), 119.1 (C), 117.3 (CH), 116.3 (C), 113.3 (C), 110.3 (C), 51.0 (CH<sub>2</sub>), 41.6 (CH<sub>2</sub>), 35.2 (CH), 32.4 (C), 29.5 (CH<sub>3</sub>), 27.2 (CH<sub>3</sub>); IR (KBr) ( $\nu_{\max}$  /cm<sup>-1</sup>): 3080, 3068, 3046, 2956, 2932, 2874, 2230, 1662, 1646, 1502, 1466, 1402, 1372, 1332, 1224, 1142, 1016, 938, 846, 812, 754, 616; HRMS (ESI)  $m/z$  calcd for C<sub>26</sub>H<sub>21</sub>NO<sub>2</sub> (M+H)<sup>+</sup> 380.1645, found 380.1679.

**9,9-Dimethyl-12-(2-hydroxyphenyl)-8,9,10,12-tetrahydro-11H-benzo[a]xanthen-11-one**

(11). Yield (86%) as a white solid; mp 223-225 °C; <sup>1</sup>H NMR (200 MHz, CDCl<sub>3</sub>): δ<sub>H</sub> (ppm) 9.18 (1H, s, OH), 7.66 (3H, m, Ar-H), 7.26 (3H, m, Ar-H), 6.92 (2H, bs, Ar-H), 6.52 (2H, bs, Ar-H), 5.67 (1H, s, CH), 2.51 (2H, s, CH<sub>2</sub>), 2.41-2.22 (2H, m, CH<sub>2</sub>), 1.05 (3H, m, CH<sub>3</sub>), 0.89 (3H, s, CH<sub>3</sub>). <sup>13</sup>C NMR (50 MHz, CDCl<sub>3</sub>): δ<sub>C</sub> (ppm) 200.9 (C=O), 167.1 (C), 153.1 (C), 148.0 (C), 132.9 (C), 131.7 (C), 131.3 (C), 129.3 (CH), 129.0 (CH), 128.5 (CH), 128.1 (CH), 127.8 (CH), 125.5 (CH), 123.7 (CH), 121.8 (CH), 119.1 (CH), 117.7 (C), 116.8 (CH), 114.1 (C), 50.5 (CH<sub>2</sub>), 41.8 (CH<sub>2</sub>), 32.6 (C), 29.3 (CH), 28.2 (CH<sub>3</sub>), 27.5 (CH<sub>3</sub>); IR (KBr) (ν<sub>max</sub> /cm<sup>-1</sup>): 3200, 3062, 3054, 3044, 2962, 2892, 2868, 1632, 1594, 1510, 1484, 1380, 1232, 1184, 1118, 1030, 812, 754; HRMS (ESI) *m/z* calcd for C<sub>25</sub>H<sub>22</sub>O<sub>3</sub>: (M+H)<sup>+</sup> 371.1642, found 371.1668.

**9,9-Dimethyl-12-(naphthalen-1-yl)-8,9,10,12-tetrahydro-11H-benzo[a]xanthen-11-one**

(12). Yield (80%) as a brown solid; mp 206-208 °C; <sup>1</sup>H NMR (200 MHz, CDCl<sub>3</sub>): δ<sub>H</sub> (ppm) 9.17 (1H, d, *J* = 9.0 Hz, Ar-H), 7.88 (1H, d, *J* = 8.0 Hz), 7.81-7.63 (4H, m, Ar-H), 7.60-7.43 (2H, m, Ar-H), 7.40-7.12 (5H, m, Ar-H), 6.41 (1H, s, CH), 2.58 (2H, s, CH<sub>2</sub>), 2.19 (2H, m, CH<sub>2</sub>), 1.01 (3H, s, CH<sub>3</sub>), 0.89 (3H, s, CH<sub>3</sub>). <sup>13</sup>C NMR (50 MHz, CDCl<sub>3</sub>): δ<sub>C</sub> (ppm) 197.3 (C=O), 163.9 (C), 147.8 (C), 142.9 (C), 133.8 (C), 132.0 (C), 131.6 (C), 131.1 (C), 129.0 (CH), 128.8 (CH), 128.5 (CH), 128.0 (CH), 127.4 (CH), 127.3 (CH), 126.5 (CH), 125.7 (CH), 125.6 (CH), 125.0 (CH), 124.8 (CH), 123.9 (CH), 119.7 (C), 117.4 (CH), 115.4 (C), 51.0 (CH<sub>2</sub>), 41.7 (CH<sub>2</sub>), 32.3 (C), 30.4 (CH), 29.5 (CH<sub>3</sub>), 27.4 (CH<sub>3</sub>); IR (KBr) (ν<sub>max</sub> /cm<sup>-1</sup>): 3052, 3032, 2956, 2870, 1646, 1620, 1596, 1516, 1400, 1370, 1220, 1176, 1144, 1068, 804, 774, 748, 654, 478; HRMS (ESI) *m/z* calcd for C<sub>29</sub>H<sub>24</sub>O<sub>2</sub> (M+H)<sup>+</sup> 405.1849, found 405.1908.

**9,9-Dimethyl-12-(4-hydroxyphenyl)-9,10-dihydro-8H-benzo[a]xanthen-11(12H)-one**

(13). Yield (71%) as a white solid; mp 210-211 °C; <sup>1</sup>H NMR (200 MHz, CDCl<sub>3</sub>): δ<sub>H</sub> (ppm) 8.00 (d, 1H, *J* = 7.7 Hz, ArH), 7.88-7.64 (m, 2H, ArH), 7.52-7.22 (m, 4H, ArH), 7.18 (d, 2H, *J* = 8.6 Hz, ArH), 6.63 (d, 2H, *J* = 8.6 Hz, ArH), 5.64 (s, 1H, CH), 2.56 (s, 2H, CH<sub>2</sub>), 2.41-2.10 (m, 2H, CH<sub>2</sub>), 1.09 (s, 3H, CH<sub>3</sub>), 0.95 (s, 3H, CH<sub>3</sub>). <sup>13</sup>C NMR (50 MHz, CDCl<sub>3</sub>): δ<sub>C</sub> (ppm) 198.7 (C=O), 164.9 (C), 154.8 (C), 147.7 (C), 136.5 (C), 131.7 (C), 131.5 (C), 129.7 (2xCH), 128.9 (CH), 128.6 (CH), 127.2 (CH), 125.1 (CH), 124.0 (CH), 118.1 (C), 117.2 (CH), 115.6 (2xCH), 114.7 (C), 51.0 (CH<sub>2</sub>), 41.6 (CH<sub>2</sub>), 34.1 (CH), 32.6 (C), 29.4 (CH<sub>3</sub>), 27.3 (CH<sub>3</sub>); IR (KBr) (ν<sub>max</sub> /cm<sup>-1</sup>): 3350, 3222, 3060, 2954, 2936, 2890, 1652, 1596, 1512, 1466, 1374, 1230, 1146, 1028, 838, 820, 748, 616, 540. HRMS (ESI) *m/z* calcd for C<sub>25</sub>H<sub>22</sub>O<sub>3</sub> (M+H)<sup>+</sup> 371.1642, found 371.1621.

**9,9-Dimethyl-12-(3-hydroxyphenyl)-9,10-dihydro-8H-benzo[a]xanthen-11(12H)-one**

(14). Yield (66%) as a yellow solid; mp 234-237 °C; <sup>1</sup>H NMR (200 MHz, DMSO-d<sub>6</sub>): δ<sub>H</sub> (ppm) 9.27 (bs, 1H, OH), 8.14-7.84 (m, 3H, *J* = 7.7 Hz, Ar-H), 7.62-7.36 (m, 3H, Ar-H), 7.10-6.91 (m, 1H, Ar-H), 6.88-6.62 (m, 2H, Ar-H), 6.49 (d, 1H, *J* = 7.8 Hz, Ar-H), 5.52 (s, 1H, CH), 2.79-2.56 (m, 2H, CH<sub>2</sub>), 2.44-2.05 (m, 2H, CH<sub>2</sub>), 1.08 (s, 3H, CH<sub>3</sub>), 0.93 (s, 3H, CH<sub>3</sub>); <sup>13</sup>C NMR (50 MHz,

DMSO-d<sub>6</sub>):  $\delta_C$  (ppm) 196.3 (C=O), 164.1 (C), 157.5 (C), 147.6 (C), 146.6 (C), 131.4 (C), 131.1 (C), 129.4 (2xCH), 128.9 (CH), 127.6 (CH), 125.4 (CH), 123.6 (CH), 119.4 (CH), 117.8 (C), 117.5 (CH), 115.5 (CH), 113.6 (CH, C), 50.6 (CH<sub>2</sub>), 40.7 (CH<sub>2</sub>), 34.3 (CH), 32.3 (C), 29.2 (CH<sub>3</sub>), 26.7 (CH<sub>3</sub>); IR (KBr) ( $\nu_{\max}$  /cm<sup>-1</sup>): 3412, 3056, 2964, 2950, 2926, 2870, 1646, 1594, 1516, 1466, 1374, 1320, 1278, 1262, 1224, 1024, 866, 752, 700, 602, 530, 486; HRMS (ESI)  $m/z$  calcd for C<sub>25</sub>H<sub>22</sub>O<sub>3</sub> (M+H)<sup>+</sup> 371.1642, found 371.1657.

**9,9-Dimethyl-12-(4-hydroxy-3-methoxyphenyl)-9,10-dihydro-8H-benzo[a]xanthen-11(12H)-one (15).** Yield (58%) as a yellow solid; mp 201-203 °C; <sup>1</sup>H NMR (200 MHz, CDCl<sub>3</sub>):  $\delta_H$  (ppm) 7.88 (d, 1H,  $J$  = 8.0 Hz, Ar-H), 7.70-7.51 (m, 2H, Ar-H), 7.42-7.09 (m, 3H, Ar-H), 6.89 (s, 1H, Ar-H), 6.56 (m, 2H, Ar-H), 5.54 (s, 1H, CH), 5.17 (bs, 1H, OH), 3.63 (s, 3H, CH<sub>3</sub>), 2.40 (bs, 2H, CH<sub>2</sub>), 2.15 (bs, 2H, CH<sub>2</sub>), 0.97 (s, 3H, CH<sub>3</sub>), 0.83 (s, 3H, CH<sub>3</sub>); <sup>13</sup>C NMR (50 MHz, CDCl<sub>3</sub>):  $\delta_C$  (ppm) 197.4 (C=O), 164.0 (C), 147.8 (C), 146.4 (C), 144.1 (C), 137.1 (C), 131.6 (2xC), 128.9 (CH), 128.5 (2xCH), 127.0 (CH), 124.9 (CH), 123.7 (CH), 117.9 (C), 117.1 (CH), 114.6 (C), 114.4 (CH), 111.6 (CH), 56.0 (CH<sub>3</sub>), 51.0 (CH<sub>2</sub>), 41.5 (CH<sub>2</sub>), 34.3 (CH), 32.3 (C), 29.4 (CH<sub>3</sub>), 27.2 (CH<sub>3</sub>); IR (KBr) ( $\nu_{\max}$  /cm<sup>-1</sup>): 3356, 3044, 2952, 2871, 1643, 1596, 1481, 1324, 1270, 1228, 1042, 752, 688, 522, 481; HRMS (ESI)  $m/z$  calcd for C<sub>26</sub>H<sub>24</sub>O<sub>4</sub> (M+H)<sup>+</sup> 401.1747, found 401.1758.

**12-(4-Nitrophenyl)-9,10-dihydro-8H-benzo[a]xanthen-11(12H)-one (16).** Yield (70%) as a yellow solid; mp 233-234 °C; <sup>1</sup>H NMR (200 MHz, CDCl<sub>3</sub>):  $\delta_H$  (ppm) 7.91 (d, 1H,  $J$  = 8.2 Hz, Ar-H), 7.81-7.57 (m, 3H, Ar-H), 7.50-7.14 (m, 5H, Ar-H), 5.72 (s, 1H, CH), 2.62 (bs, 2H, CH<sub>2</sub>), 2.33 (bs, 2H, CH<sub>2</sub>), 2.06-1.73 (m, 2H, CH<sub>2</sub>); <sup>13</sup>C NMR (50 MHz, CDCl<sub>3</sub>):  $\delta_C$  (ppm) 197.1 (C=O), 166.5 (C), 152.3 (C), 147.9 (C), 146.4(C), 131.7 (C), 131.1 (C), 129.8 (CH), 129.6 (2xCH), 128.8 (CH), 127.5 (CH), 125.4 (CH), 123.8 (2xCH), 123.3 (CH), 117.2 (CH), 116.2 (C), 114.3 (C), 37.1 (CH<sub>2</sub>), 35.0 (CH), 27.9 (CH<sub>2</sub>), 20.4 (CH<sub>2</sub>); IR (KBr) ( $\nu_{\max}$  /cm<sup>-1</sup>): 3108, 3066, 2970, 2940, 2856, 1652, 1594, 1518, 1458, 1372, 1352, 1228, 1190, 1140, 1072, 1000, 948, 904, 856, 832, 744, 716, 608; HRMS (ESI)  $m/z$  calcd for C<sub>24</sub>H<sub>17</sub>NO<sub>4</sub> (M+H)<sup>+</sup> 372.1230, found 372.1116.

**12-(3-Methoxyphenyl)-9,10-dihydro-8H-benzo[a]xanthen-11(12H)-one (17).** Yield (79%) as a yellow solid; mp 213-215 °C; <sup>1</sup>H NMR (200 MHz, CDCl<sub>3</sub>):  $\delta_H$  (ppm) 8.00 (d, 1H,  $J$  = 7.8 Hz, Ar-H), 7.90-7.64 (m, 2H, Ar-H), 7.54-7.22 (m, 3H, Ar-H), 7.20-7.04 (t, 1H,  $J$  = 7.2 Hz, Ar-H), 6.96 (d, 2H,  $J$  = 7.8 Hz, Ar-H), 6.63 (d, 1H,  $J$  = 8.7 Hz, Ar-H), 5.76 (s, 1H, CH), 3.73 (s, 3H, CH<sub>3</sub>), 2.82-2.57 (m, 2H, CH<sub>2</sub>), 2.54-2.22 (m, 2H, CH<sub>2</sub>), 2.18-1.83 (m, 2H, CH<sub>2</sub>); <sup>13</sup>C NMR (50 MHz, CDCl<sub>3</sub>):  $\delta_C$  (ppm) 197.1 (C=O), 165.8 (C), 159.7 (C), 148.0 (C), 146.8 (C), 131.7 (2xC), 129.3 (CH), 129.0 (CH), 128.6 (CH), 127.2 (CH), 125.1 (CH), 123.9 (CH), 121.2 (CH), 117.7 (C), 117.2 (CH), 115.6 (C), 115.0 (CH), 111.4 (CH), 55.3 (CH<sub>3</sub>), 37.2 (CH<sub>2</sub>), 34.8 (CH), 27.9 (CH<sub>2</sub>), 20.4 (CH<sub>2</sub>); IR (KBr) ( $\nu_{\max}$  /cm<sup>-1</sup>): 3054, 3022, 2954, 2938, 2834, 1648, 1608, 1594,



1560, 1508, 1488, 1458, 1436, 1372, 1276, 1230, 1188, 1140, 1052, 1000, 952, 818, 786, 758, 696, 650, 528; HRMS (ESI)  $m/z$  calcd for  $C_{24}H_{20}O_3$  (M+H)<sup>+</sup> 357.1485, found 357.1400.

**12-(Naphthalen-1-yl)-9,10-dihydro-8H-benzo[a]xanthen-11(12H)-one (18).** Yield (81%) as a yellow solid; mp 209-210 °C; <sup>1</sup>H NMR (200 MHz, CDCl<sub>3</sub>):  $\delta_H$  (ppm) 9.33 (d, 1H,  $J$  = 8.5 Hz), 8.20-7.70 (m, 5H, Ar-H), 7.68-7.20 (m, 7H, Ar-H), 6.55 (s, 1H, CH), 2.91-2.60 (m, 2H, CH<sub>2</sub>), 2.51-2.23 (m, 2H, CH<sub>2</sub>), 2.10-1.65 (m, 2H, CH<sub>2</sub>); <sup>13</sup>C NMR (50 MHz, CDCl<sub>3</sub>):  $\delta_C$  (ppm) 197.3 (C=O), 165.7 (C), 147.8 (C), 143.1 (C), 133.7 (C), 131.8 (C), 131.5 (C), 131.0 (C), 128.8 (CH), 128.7 (CH), 128.5 (CH), 127.9 (CH), 127.3 (CH), 127.2 (CH), 126.4 (CH), 125.7 (CH), 125.6 (CH), 124.9 (CH), 124.8 (CH), 123.8 (CH), 119.8 (C), 117.2 (CH), 116.6 (C), 37.1 (CH<sub>2</sub>), 30.4 (CH), 28.0 (CH<sub>2</sub>), 27.3 (CH<sub>2</sub>); IR (KBr) ( $\nu_{max}$  /cm<sup>-1</sup>): 3060, 3032, 2964, 2932, 1652, 1618, 1594, 1510, 1452, 1372, 1250, 1228, 1188, 1070, 1030, 998, 950, 832, 804, 780, 752, 650, 530, 458; HRMS (ESI)  $m/z$  calcd for  $C_{27}H_{20}O_2$  (M+H)<sup>+</sup> 377.1536, found 377.1522.

**12-(Naphthalen-2-yl)-9,10-dihydro-8H-benzo[a]xanthen-11(12H)-one (19).** Yield (84%) as a yellow solid; mp 190-191 °C; <sup>1</sup>H NMR (200 MHz, CDCl<sub>3</sub>):  $\delta_H$  (ppm) 8.11 (d, 1H,  $J$  = 7.8 Hz, Ar-H), 8.00-7.70 (m, 6H, Ar-H), 7.65-7.20 (m, 6H, Ar-H), 6.02 (s, 1H, CH), 2.88-2.60 (m, 2H, CH<sub>2</sub>), 2.50-2.20 (m, 2H, CH<sub>2</sub>), 2.10-1.55 (m, 2H, CH<sub>2</sub>); <sup>13</sup>C NMR (50 MHz, CDCl<sub>3</sub>):  $\delta_C$  (ppm) 197.2 (C=O), 165.8 (C), 147.9 (C), 142.6 (C), 133.4 (C), 132.2 (C), 131.6 (C), 131.5 (C), 129.1 (CH), 128.5 (CH), 128.2 (CH), 128.1 (CH), 127.6 (CH), 127.3 (CH), 127.2 (CH), 126.9 (CH), 125.9 (CH), 125.6 (CH), 125.0 (CH), 123.8 (CH), 117.6 (C), 117.1 (CH), 115.4 (C), 37.1 (CH<sub>2</sub>), 35.0 (CH), 27.8 (CH<sub>2</sub>), 20.3 (CH<sub>2</sub>); IR (KBr) ( $\nu_{max}$  /cm<sup>-1</sup>): 3054, 3020, 2934, 2886, 1652, 1618, 1596, 1508, 1458, 1400, 1374, 1230, 1194, 1144, 1072, 998, 956, 858, 820, 748, 648, 530, 480; HRMS (ESI)  $m/z$  calcd for  $C_{27}H_{20}O_2$  (M+H)<sup>+</sup> 377.1536, found 377.1518.

**12-(4-(Methylthio)phenyl)-8,9,10,12-tetrahydro-11H-benzo[a]xanthen-11-one (20).** Yield (73%) as an orange solid; mp 179-182 °C; <sup>1</sup>H NMR (200 MHz, CDCl<sub>3</sub>):  $\delta_H$  (ppm) 8.03-7.85 (1H, d,  $J$  = 7.8 Hz, Ar-H), 7.83-7.65 (2H, m, Ar-H), 7.50-7.15 (5H, m, Ar-H), 7.04 (2H, d,  $J$  = 8.4 Hz, Ar-H), 5.69 (1H, s, CH), 2.81-2.53 (2H, m, CH<sub>2</sub>), 2.50-2.20 (5H, m, CH<sub>3</sub>, CH<sub>2</sub>), 2.10-1.80 (2H, m, CH<sub>2</sub>). <sup>13</sup>C NMR (50 MHz, CDCl<sub>3</sub>):  $\delta_C$  (ppm) 197.3 (C=O), 165.8 (C), 147.9 (C), 142.3 (C), 136.1 (C), 131.7 (C), 131.5 (C), 129.5 (2xCH), 129.1 (CH), 128.6 (CH), 127.2 (CH), 126.8 (2xCH), 125.1 (CH), 123.8 (CH), 117.6 (C), 117.1 (CH), 115.5 (C), 37.2 (CH<sub>2</sub>), 34.3 (CH), 27.9 (CH<sub>2</sub>), 20.5 (CH<sub>2</sub>), 16.0 (CH<sub>3</sub>); IR (KBr) ( $\nu_{max}$  /cm<sup>-1</sup>): 3068, 3022, 2950, 2918, 2884, 1654, 1618, 1596, 1560, 1492, 1374, 1230, 1190, 1140, 1092, 1000, 956, 824, 750, 610; HRMS (ESI)  $m/z$  calcd for  $C_{24}H_{20}SO_2$  (M+H)<sup>+</sup> 373.1257, found 373.1310.

**12-(2-Hydroxyphenyl)-8,9,10,12-tetrahydro-11H-benzo[a]xanthen-11-one (21).** Yield (83%) as a white solid; mp 205-206 °C; <sup>1</sup>H NMR (200 MHz, CDCl<sub>3</sub>):  $\delta_H$  (ppm) 9.44 (s, 1H, OH), 7.88-7.77 (m, 2H, Ar-H), 7.71-7.60 (m, 1H, Ar-H), 7.48-7.31 (m, 3H, Ar-H), 7.10-6.88 (m, 2H, Ar-H), 6.70-6.42 (m, 2H, Ar-H), 5.78 (s, 1H, CH), 2.88-2.66 (m, 2H, CH<sub>2</sub>), 2.62-2.38 (m, 2H, CH<sub>2</sub>),

2.20-1.90 (m, 2H, CH<sub>2</sub>). <sup>13</sup>C NMR (50 MHz, CDCl<sub>3</sub>): δ<sub>C</sub> (ppm) 201.3 (C=O), 168.9 (C), 153.3 (C), 148.1 (C), 133.0 (C), 131.8 (C), 131.3 (C), 129.4 (CH), 129.2 (CH), 128.5 (CH), 128.2 (CH), 127.8 (CH), 125.5 (CH), 123.7 (CH), 121.7 (CH), 119.0 (CH), 117.8 (C), 116.8 (CH), 115.4 (C), 36.6 (CH<sub>2</sub>), 28.4 (CH), 28.2 (CH<sub>2</sub>), 20.2 (CH<sub>2</sub>); IR (KBr) (ν<sub>max</sub>/cm<sup>-1</sup>): 3230, 3072, 3058, 3040, 2944, 2892, 1630, 1594, 1516, 1484, 1456, 1378, 1232, 1192, 1128, 1066, 1004, 958, 822, 764, 698, 650, 610, 480; Anal. calcd. for C<sub>25</sub>H<sub>22</sub>O<sub>3</sub>: C, 80.68; H, 5.30. Found: C, 80.78; H, 5.15.

**12-Phenyl-8,9,10,12-tetrahydro-11H-benzo[a]xanthen-11-one (22).** Yield (73%) as a white solid; mp 182-184 °C; <sup>1</sup>H NMR (200 MHz, CDCl<sub>3</sub>): δ<sub>H</sub> (ppm) 7.83 (d, 1H, *J* = 7.7 Hz, Ar-H), 7.75-7.50 (m, 2H, Ar-H), 7.43-7.12 (m, 5H, Ar-H), 7.10-6.80 (m, 3H, Ar-H), 5.62 (s, 1H, CH), 2.70-2.40 (m, 2H, CH<sub>2</sub>), 2.38-2.05 (m, 2H, CH<sub>2</sub>), 2.00-1.52 (m, 2H, CH<sub>2</sub>). <sup>13</sup>C NMR (50 MHz, CDCl<sub>3</sub>): δ<sub>C</sub> (ppm) 197.1 (C=O), 165.7 (C), 147.8 (C), 145.2 (C), 131.6 (C), 131.5 (C), 128.9 (CH), 128.6 (2xCH), 128.4 (CH), 127.1 (2xCH), 126.4 (CH), 125.0 (CH), 124.7 (CH), 123.7 (CH), 117.8 (C), 117.1 (CH), 115.6 (C), 37.1 (CH<sub>2</sub>), 34.7 (CH), 27.8 (CH<sub>2</sub>), 20.3 (CH<sub>2</sub>); IR (KBr) (ν<sub>max</sub>/cm<sup>-1</sup>): 3058, 3028, 2956, 2930, 2824, 1664, 1618, 1594, 1512, 1492, 1452, 1398, 1372, 1272, 1224, 1190, 1078, 1028, 1000, 954, 870, 832, 818, 702, 610, 530, 516; HRMS (ESI) *m/z* calcd for C<sub>23</sub>H<sub>18</sub>O<sub>2</sub> (M+H)<sup>+</sup> 327.1380, found 327.1400.

**10,10-Dimethyl-12-phenyl-9,10-dihydro-8H-benzo[a]xanthen-11(12H)-one (23).** Yield (74%) as a white solid; mp 160-161 °C; <sup>1</sup>H NMR (200 MHz, CDCl<sub>3</sub>): δ<sub>H</sub> (ppm) 8.04 (d, 1H, *J* = 8.2 Hz, Ar-H), 7.88-7.66 (m, 2H, Ar-H), 7.54-7.31 (m, 5H, Ar-H), 7.29-6.95 (m, 3H, Ar-H), 5.78 (s, 1H, CH), 2.83-2.54 (m, 2H, CH<sub>2</sub>), 2.08-1.71 (m, 2H, CH<sub>2</sub>), 1.16 (s, 3H, CH<sub>3</sub>), 1.07 (s, 3H, CH<sub>3</sub>); <sup>13</sup>C NMR (50 MHz, CDCl<sub>3</sub>): δ<sub>C</sub> (ppm) 202.0 (C=O), 163.6 (C), 147.8 (C), 145.2 (C), 131.6 (2xC), 128.9 (CH), 128.6 (2xCH), 128.5 (CH), 128.4 (2xCH), 127.1 (CH), 126.3 (CH), 124.9 (CH), 123.7 (CH), 117.8 (C), 117.1 (CH), 113.7 (C), 40.5 (C), 35.2 (CH), 33.9 (CH<sub>2</sub>), 24.8 (CH<sub>2</sub>), 24.4 (2xCH<sub>3</sub>); IR (KBr) (ν<sub>max</sub>/cm<sup>-1</sup>): 3076, 3022, 2974, 2960, 2928, 2866, 1644, 1618, 1596, 1518, 1452, 1376, 1326, 1238, 1200, 1076, 948, 908, 834, 820, 750, 702, 624, 506; HRMS (ESI) *m/z* calcd for C<sub>25</sub>H<sub>22</sub>O<sub>2</sub> (M+H)<sup>+</sup> 355.1693, found 355.1613.

**10,10-Dimethyl-12-(4-fluorophenyl)-9,10-dihydro-8H-benzo[a]xanthen-11(12H)-one (24).** Yield (78%) as a white solid; mp 157-159 °C; <sup>1</sup>H NMR (200 MHz, CDCl<sub>3</sub>): δ<sub>H</sub> (ppm) 7.96 (d, 1H, *J* = 8.1 Hz, Ar-H), 7.88-7.64 (m, 2H, Ar-H), 7.53-7.18 (m, 5H, Ar-H), 6.89 (t, 2H, *J* = 8.7 Hz, Ar-H), 5.75 (s, 1H, CH), 2.73 (t, 2H, *J* = 6.2 Hz, CH<sub>2</sub>), 1.98-1.70 (m, 2H, CH<sub>2</sub>), 1.16 (s, 3H, CH<sub>3</sub>), 1.07 (s, 3H, CH<sub>3</sub>); <sup>13</sup>C NMR (50 MHz, CDCl<sub>3</sub>): δ<sub>C</sub> (ppm) 202.1 (C=O), 163.7 (C), 161.3 (d, *J*<sub>C-F</sub> = 242.1 Hz, C), 147.8 (C), 141.1 (d, *J*<sub>C-F</sub> = 2.7 Hz, C), 131.6 (C), 131.4 (C), 130.1 (d, *J*<sub>C-F</sub> = 8.1 Hz, 2xCH), 129.1 (CH), 128.6 (CH), 127.2 (CH), 125.1 (CH), 123.7 (CH), 117.5 (C), 117.2 (CH), 115.2 (d, *J*<sub>C-F</sub> = 21.3 Hz, 2xCH), 113.5 (C), 40.6 (C), 34.6 (CH), 33.9 (CH<sub>2</sub>), 24.8 (CH<sub>2</sub>), 24.4 (2xCH<sub>3</sub>); IR (KBr) (ν<sub>max</sub>/cm<sup>-1</sup>): 3054, 2962, 2928, 2866, 1648, 1598, 1504, 1466,

1372, 1236, 1156, 1014, 958, 908, 810, 746, 620, 530, 500; HRMS (ESI)  $m/z$  calcd for  $C_{25}H_{21}FO_2$  (M+H)<sup>+</sup> 373.1598, found 373.1611.

**10,10-Dimethyl-12-(4-(methylthio)phenyl)-9,10-dihydro-8H-benzo[a]xanthen-11(12H)-one (25).** Yield (90%) as a white solid; mp 159-160 °C; <sup>1</sup>H NMR (200 MHz, CDCl<sub>3</sub>): δ<sub>H</sub> (ppm) 8.08 (d, 1H, *J* = 8.0 Hz, Ar-H), 7.85-7.62 (m, 2H, Ar-H), 7.53-7.19 (m, 5H, Ar-H), 7.08 (d, 2H, *J* = 8.2 Hz, Ar-H), 5.70 (s, 1H, CH), 2.72 (t, 2H, *J* = 6.2 Hz, CH<sub>2</sub>), 2.36 (s, 3H, CH<sub>3</sub>), 2.01-1.72 (m, 2H, CH<sub>2</sub>), 1.14 (s, 3H, CH<sub>3</sub>), 1.07 (s, 3H, CH<sub>3</sub>); <sup>13</sup>C NMR (50 MHz, CDCl<sub>3</sub>): δ<sub>C</sub> (ppm) 202.0 (C=O), 163.6 (C), 147.8 (C), 142.3 (C), 135.9 (C), 131.6 (C), 131.4 (C), 129.0 (2xCH), 128.9 (CH), 128.5 (CH), 127.1 (CH), 126.6 (2xCH), 125.0 (CH), 123.7 (CH), 117.5 (C), 117.1 (CH), 113.5 (C), 40.5 (C), 34.7 (CH), 33.9 (CH<sub>2</sub>), 24.9 (CH<sub>3</sub>), 24.8 (CH<sub>2</sub>), 24.4 (CH<sub>3</sub>), 15.8 (CH<sub>3</sub>); IR (KBr) (ν<sub>max</sub>/cm<sup>-1</sup>): 3068, 3020, 2958, 2916, 2866, 1646, 1596, 1490, 1372, 1234, 1196, 1090, 956, 844, 818, 748, 730, 512; HRMS (ESI)  $m/z$  calcd for  $C_{26}H_{24}SO_2$  (M+H)<sup>+</sup> 401.1570, found 401.1555.

**10,10-Dimethyl-12-(3-methoxyphenyl)-9,10-dihydro-8H-benzo[a]xanthen-11(12H)-one (26).** Yield (82%) as a white solid; mp 161-162 °C; <sup>1</sup>H NMR (200 MHz, CDCl<sub>3</sub>): δ<sub>H</sub> (ppm) 7.99 (d, 1H, *J* = 7.8 Hz, Ar-H), 7.88-7.61 (m, 2H, Ar-H), 7.54-7.21 (m, 3H, Ar-H), 7.16-6.77 (m, 3H, Ar-H), 6.59 (d, 1H, *J* = 7.8 Hz, Ar-H), 5.69 (s, 1H, CH), 3.68 (s, 3H, CH<sub>3</sub>), 2.69 (t, 2H, *J* = 5.8 Hz, CH<sub>2</sub>), 2.04-1.73 (m, 2H, CH<sub>2</sub>), 1.11 (s, 3H, CH<sub>3</sub>), 1.04 (s, 3H, CH<sub>3</sub>); <sup>13</sup>C NMR (50 MHz, CDCl<sub>3</sub>): δ<sub>C</sub> (ppm) 201.8 (C=O), 163.6 (C), 159.5 (C), 147.8 (C), 146.7 (C), 131.5 (C), 129.1 (CH), 128.8 (CH), 128.4 (CH), 127.0 (CH), 124.9 (CH), 123.6 (2xCH), 121.1 (CH), 117.6 (C), 117.0 (C), 114.9 (CH), 113.5 (C), 111.0 (CH), 55.0 (CH<sub>3</sub>), 40.5 (C), 35.0 (CH), 33.7 (CH<sub>2</sub>), 24.8 (CH<sub>3</sub>), 24.7 (CH<sub>2</sub>), 24.3 (CH<sub>3</sub>); IR (KBr) (ν<sub>max</sub>/cm<sup>-1</sup>): 3048, 2994, 2962, 2928, 2832, 1648, 1598, 1584, 1518, 1488, 1452, 1374, 1314, 1260, 1200, 1144, 1052, 956, 818, 774, 748, 718, 694, 526; HRMS (ESI)  $m/z$  calcd for  $C_{26}H_{24}O_3$  (M+H)<sup>+</sup> 385.1798, found 385.1732.

**10,10-Dimethyl-12-(4-methoxyphenyl)-9,10-dihydro-8H-benzo[a]xanthen-11(12H)-one (27).** Yield (84%) as a white solid; mp 159-162 °C; <sup>1</sup>H NMR (200 MHz, CDCl<sub>3</sub>): δ<sub>H</sub> (ppm) 7.97 (d, 1H, *J* = 7.7 Hz, Ar-H), 7.83-7.64 (m, 2H, Ar-H), 7.55-7.11 (m, 5H, Ar-H), 6.69 (d, 2H, *J* = 7.3 Hz, Ar-H), 5.65 (s, 1H, CH), 2.68 (s, 3H, CH<sub>3</sub>), 2.70 (t, 2H, *J* = 5.7 Hz, CH<sub>2</sub>), 2.00-1.69 (m, 2H, CH<sub>2</sub>), 1.11 (s, 3H, CH<sub>3</sub>), 1.04 (s, 3H, CH<sub>3</sub>); <sup>13</sup>C NMR (50 MHz, CDCl<sub>3</sub>): δ<sub>C</sub> (ppm) 202.1 (C=O), 163.4 (C), 157.9 (C), 147.8 (C), 137.6 (C), 131.6 (C), 131.5 (C), 129.5 (2xCH), 128.8 (CH), 128.5 (CH), 127.0 (CH), 124.9 (CH), 123.8 (CH), 118.0 (C), 117.1 (CH), 113.8 (C), 113.7 (2xCH), 55.2 (CH<sub>3</sub>), 40.6 (C), 34.4 (CH), 33.9 (CH<sub>2</sub>), 24.9 (CH<sub>3</sub>), 24.8 (CH<sub>2</sub>), 24.4 (CH<sub>3</sub>); IR (KBr) (ν<sub>max</sub>/cm<sup>-1</sup>): 3026, 3010, 2956, 2926, 2830, 1648, 1598, 1508, 1458, 1374, 1254, 1200, 1104, 1034, 954, 830, 810, 746, 550; HRMS (ESI)  $m/z$  calcd for  $C_{26}H_{24}O_3$  (M+H)<sup>+</sup> 385.1798, found 385.1722.

**10,10-Dimethyl-12-(naphthalen-1-yl)-9,10-dihydro-8H-benzo[a]xanthen-11(12H)-one (28).** Yield (88%) as a brown solid; mp 200-202 °C; <sup>1</sup>H NMR (200 MHz, CDCl<sub>3</sub>): δ<sub>H</sub> (ppm) 9.19 (d, 1H, *J* = 8.5 Hz, Ar-H), 7.91 (d, 1H, *J* = 7.8 Hz, Ar-H), 7.84-7.65 (m, 4H, Ar-H), 7.60-7.06 (m, 7H, Ar-H), 6.41 (s, 1H, CH), 2.78 (s, 2H, CH<sub>2</sub>), 1.84 (t, 2H, *J* = 5.7 Hz, CH<sub>2</sub>), 1.10 (s, 3H, CH<sub>3</sub>), 0.91 (s, 3H, CH<sub>3</sub>); <sup>13</sup>C NMR (50 MHz, CDCl<sub>3</sub>): δ<sub>C</sub> (ppm) 202.1 (C=O), 163.5(C), 147.6 (C), 143.2 (C), 133.6 (C), 131.8 (C), 131.4 (C), 131.1 (C), 128.7 (2xCH), 128.4 (CH), 127.9 (2xCH), 127.2 (CH), 127.1 (CH), 126.4 (CH), 125.5 (CH), 124.8 (2xCH), 123.8 (CH), 119.8 (C), 117.2 (CH), 114.6 (C), 40.5 (C), 33.8 (CH<sub>2</sub>), 30.8 (CH), 25.0 (CH<sub>2</sub>), 24.7 (CH<sub>3</sub>), 24.4 (CH<sub>3</sub>); IR (KBr) (ν<sub>max</sub>/cm<sup>-1</sup>): 3048, 2962, 2930, 2864, 1714, 1646, 1618, 1592, 1510, 1460, 1370, 1326, 1196, 1100, 1070, 1028, 944, 906, 820, 782, 736, 484; HRMS (ESI) *m/z* calcd for C<sub>29</sub>H<sub>24</sub>O<sub>2</sub> (M+H)<sup>+</sup> 405.1849, found 405.1908.

**10,10-Dimethyl-12-(4-hydroxy-3,5-dimethoxyphenyl)-9,10-dihydro-8H-benzo[a]xanthen-11(12H)-one (29).** Yield (59%) as a white solid; mp 212-214 °C; <sup>1</sup>H NMR (200 MHz, CDCl<sub>3</sub>): δ<sub>H</sub> (ppm) 8.10-7.92 (bs, 1H, Ar-H), 7.85-7.68 (bs, 2H, Ar-H), 7.58-7.22 (m, 3H, Ar-H), 6.54 (s, 2H, Ar-H), 5.68 (bs, 1H, CH), 5.40 (bs, 1H, OH), 3.74 (s, 6H, 2xCH<sub>3</sub>), 2.92-2.52 (m, 2H, CH<sub>2</sub>), 2.06-1.69 (m, 2H, CH<sub>2</sub>), 1.12 (s, 3H, CH<sub>3</sub>), 1.08 (s, 3H, CH<sub>3</sub>); <sup>13</sup>C NMR (50 MHz, CDCl<sub>3</sub>): δ<sub>C</sub> (ppm) 202.3(C=O), 163.6 (C), 148.0 (C), 146.9 (2xC), 136.6 (C), 133.2(C), 131.6 (C), 131.5 (C), 128.9 (CH), 128.5 (CH), 127.1 (CH), 125.0 (CH), 123.8 (CH), 117.7 (C), 117.0 (CH), 113.8 (C), 105.4 (2xCH), 56.4 (2xCH<sub>3</sub>), 40.7 (C), 34.9 (CH), 33.9 (CH<sub>2</sub>), 25.0 (CH<sub>3</sub>), 24.9 (CH<sub>2</sub>), 24.5 (CH<sub>3</sub>); IR (KBr) (ν<sub>max</sub>/cm<sup>-1</sup>): 3550, 3370, 3070, 2954, 2932, 2836, 1644, 1618, 1598, 1518, 1464, 1426, 1372, 1326, 1220, 1122, 950, 918, 820, 748, 718, 644, 540; HRMS (ESI) *m/z* calcd for C<sub>26</sub>H<sub>24</sub>O<sub>3</sub> (M+H)<sup>+</sup> 431.1853, found 431.1850.

**10,10-Dimethyl-12-(naphthalen-2-yl)-9,10-dihydro-8H-benzo[a]xanthen-11(12H)-one (30).** Yield (82%) as a yellow solid; mp 217-218 °C; <sup>1</sup>H NMR (200 MHz, CDCl<sub>3</sub>): δ<sub>H</sub> (ppm) 8.02 (d, 2H, *J* = 8.1 Hz, ArH), 7.86-7.60 (m, 6H, Ar-H), 7.56-7.43 (m, 1H, Ar-H), 7.41-7.19 (m, 5H, Ar-H), 5.88 (s, 1H, CH), 2.68 (t, 2H, *J* = 6.1 Hz, CH<sub>2</sub>), 1.87-1.63 (m, 2H, CH<sub>2</sub>), 1.08 (s, 3H, CH<sub>3</sub>), 0.96 (s, 3H, CH<sub>3</sub>); <sup>13</sup>C NMR (50 MHz, CDCl<sub>3</sub>): δ<sub>C</sub> (ppm) 202.1 (C=O), 163.8 (C), 148.0 (C), 142.7 (C), 133.5 (C), 132.3 (C), 131.6 (C), 129.1 (CH), 128.5 (CH), 128.2 (2xCH), 127.6 (CH), 127.3 (CH), 127.2 (CH), 127.1 (CH), 125.9 (CH), 125.5 (CH), 125.0 (CH), 123.8 (CH), 117.8 (C), 117.2 (CH), 113.6 (C), 40.6 (C), 35.5 (CH), 33.9 (CH<sub>2</sub>), 24.9 (CH<sub>2</sub>, CH<sub>3</sub>), 24.4 (CH<sub>3</sub>); IR (KBr) (ν<sub>max</sub>/cm<sup>-1</sup>): 3056, 3022, 2964, 2936, 2860, 1654, 1620, 1596, 1508, 1460, 1450, 1370, 1328, 1236, 1196, 1102, 1072, 1028, 948, 854, 822, 784, 748, 548, 474; HRMS (ESI) *m/z* calcd for C<sub>29</sub>H<sub>24</sub>O<sub>2</sub> (M+H)<sup>+</sup> 405.1849, found 405.1811.

**10,10-Dimethyl-12-(benzo[d][1,3]dioxol-5-yl)-8,9,10,12-tetrahydro-11H-benzo[a]xanthen-11-one (31).** Yield (79%) as a white solid; mp 202-204 °C; <sup>1</sup>H NMR (200 MHz, CDCl<sub>3</sub>): δ<sub>H</sub> (ppm) 7.99 (1H, d, *J* = 8.1 Hz, Ar-H), 7.88-7.67 (m, 2H, Ar-H), 7.58-7.18 (m, 3H, Ar-H), 6.88 (d, 1H, *J* = 8.0 Hz, Ar-H), 6.77 (s, 1H, Ar-H), 6.63 (d, 1H, *J* = 8.0 Hz, Ar-H), 5.95-5.71 (d, 2H, *J*

= 8.7 Hz, OCH<sub>2</sub>O), 5.65 (s, 1H, CH), 2.90-2.60 (m, 2H, CH<sub>2</sub>), 2.04-1.72 (m, 2H, CH<sub>2</sub>), 1.14 (s, 3H, CH<sub>3</sub>), 1.08 (s, 3H, CH<sub>3</sub>). <sup>13</sup>C NMR (50 MHz, CDCl<sub>3</sub>): δ<sub>C</sub> (ppm) 202.2 (C=O), 163.7 (C), 147.9 (C), 147.6 (C), 145.9 (C), 139.4 (C), 131.7 (C), 131.6 (C), 129.0 (CH), 128.6 (CH), 127.2 (CH), 125.1 (CH), 123.8 (CH), 122.0 (CH), 117.9 (C), 117.2 (CH), 113.8 (C), 109.2 (CH), 108.1 (CH), 100.9 (CH<sub>2</sub>), 40.7 (C), 34.9 (CH), 34.0 (CH<sub>2</sub>), 25.0 (CH<sub>3</sub>), 24.9 (CH<sub>2</sub>), 24.5 (CH<sub>3</sub>); IR (KBr) (ν<sub>max</sub>/cm<sup>-1</sup>): 3060, 2980, 2954, 2934, 2856, 2854, 2772, 1714, 1650, 1596, 1500, 1484, 1374, 1236, 1200, 1038, 954, 924, 814, 744, 528; HRMS (ESI) *m/z* calcd for C<sub>26</sub>H<sub>22</sub>O<sub>4</sub> (M+H)<sup>+</sup> 399.1591, found 399.1613.

**10,10-Dimethyl-12-(4-chlorophenyl)-8,9,10,12-tetrahydro-11H-benzo[a]xanthen-11-one**

**(32)**. Yield (81%) as a white solid; mp 168-170 °C; <sup>1</sup>H NMR (200 MHz, CDCl<sub>3</sub>): δ<sub>H</sub> (ppm) 7.94 (d, 1H, *J* = 8.1 Hz, Ar-H), 7.85-7.63 (m, 2H, Ar-H), 7.55-7.24 (m, 5H, Ar-H), 7.16 (d, 2H, *J* = 8.5 Hz, Ar-H), 5.73 (s, 1H, CH), 2.86-2.58 (m, 2H, CH<sub>2</sub>), 2.02-1.66 (m, 2H, CH<sub>2</sub>), 1.15 (s, 3H, CH<sub>3</sub>), 1.07 (s, 3H, CH<sub>3</sub>). <sup>13</sup>C NMR (50 MHz, CDCl<sub>3</sub>): δ<sub>C</sub> (ppm) 202.0 (C=O), 163.8 (C), 147.8 (C), 143.8 (C), 132.0 (C), 131.6 (C), 131.4 (C), 130.0 (2xCH, C), 129.2 (CH), 128.6 (CH), 128.5 (2xCH), 127.2 (CH), 125.1 (CH), 123.6 (CH), 117.2 (CH), 113.3 (C), 40.6 (C), 34.8 (CH<sub>3</sub>, CH), 33.9 (CH<sub>2</sub>), 24.8 (CH<sub>2</sub>), 24.4 (CH<sub>3</sub>); IR (KBr) (ν<sub>max</sub>/cm<sup>-1</sup>): 3078, 3046, 2958, 2926, 2856, 1642, 1598, 1488, 1376, 1330, 1238, 1200, 1090, 1016, 954, 840, 742, 510; HRMS (ESI) *m/z* calcd for C<sub>25</sub>H<sub>21</sub>ClO<sub>2</sub> (M+H)<sup>+</sup> 389.1303, found 389.1349.

**7,7-Dimethyl-10-(4-(methylthio)phenyl)-6,7,8,10-tetrahydro-9H-[1,3]-dioxolo[4,5-**

**b]xanthen-9-one (33)**. Yield (81%) as an orange solid; mp 177-179 °C; <sup>1</sup>H NMR (200 MHz, CDCl<sub>3</sub>): δ<sub>H</sub> (ppm) 7.14 (bs, 4H, Ar-H), 6.59 (s, 1H, Ar-H), 6.46 (s, 1H, Ar-H), 5.89 (bs, 1H, OCH<sub>2</sub>O), 5.85 (bs, 1H, OCH<sub>2</sub>O), 4.86 (s, 1H, CH), 2.51 (s, 2H, CH<sub>2</sub>), 2.41 (s, 3H, CH<sub>3</sub>), 2.33-2.08 (m, 2H, CH<sub>2</sub>), 1.11 (s, 3H, CH<sub>3</sub>), 1.02 (s, 3H, CH<sub>3</sub>). <sup>13</sup>C NMR (50 MHz, CDCl<sub>3</sub>): δ<sub>C</sub> (ppm) 196.9 (C=O), 164.5 (C), 146.9 (C), 144.9 (C), 143.9 (C), 143.4 (C), 136.2 (C), 128.4 (2xCH), 126.9 (2xCH), 117.4 (C), 112.7 (C), 108.3 (CH), 101.6 (CH<sub>2</sub>), 98.3 (CH), 50.9 (CH<sub>2</sub>), 41.5 (CH<sub>2</sub>), 37.8 (CH), 32.2 (C), 29.5 (CH<sub>3</sub>), 27.5 (CH<sub>3</sub>), 16.0 (CH<sub>3</sub>); IR (KBr) (ν<sub>max</sub>/cm<sup>-1</sup>): 3038, 2960, 2912, 1650, 1618, 1504, 1480, 1376, 1218, 1144, 1092, 1030, 932, 840, 760. Anal. calcd. for C<sub>23</sub>H<sub>22</sub>SO<sub>4</sub>: C, 70.03; H, 5.62. Found: C, 69.99; H, 5.75.

**7,7-Dimethyl-10-(naphthalen-1-yl)-6,7,8,10-tetrahydro-9H-[1,3]-dioxolo[4,5-b]xanthen-9-**

**one (34)**. Yield (77%) as a white solid; mp 206-208 °C; <sup>1</sup>H NMR (200 MHz, CDCl<sub>3</sub>): δ<sub>H</sub> (ppm) 8.56 (bs, 1H, ArH), 7.84 (d, 1H, *J* = 8.0 Hz, ArH), 7.77-7.25 (m, 5H, ArH), 6.61 (s, 1H, ArH), 6.46 (s, 1H, ArH), 6.02-5.64 (m, 3H, CH<sub>2</sub>, CH), 2.60 (s, 2H, CH<sub>2</sub>), 2.34-2.07 (m, 2H, CH<sub>2</sub>), 1.15 (s, 3H, CH<sub>3</sub>), 1.06 (s, 3H, CH<sub>3</sub>). <sup>13</sup>C NMR (50 MHz, CDCl<sub>3</sub>): δ<sub>C</sub> (ppm) 197.0 (C=O), 164.6 (C), 146.9 (C), 144.7 (C), 143.4 (2xC), 134.1 (C), 131.2 (C), 128.9 (CH), 127.3 (CH), 126.4 (CH), 125.6 (3xCH), 123.7 (CH), 118.4 (C), 113.2 (C), 107.8 (CH), 101.5 (CH<sub>2</sub>), 98.4 (CH), 50.8 (CH<sub>2</sub>), 41.6 (CH<sub>2</sub>), 32.2 (C), 29.4 (CH<sub>3</sub>, CH), 27.6 (CH<sub>3</sub>); IR (KBr) (ν<sub>max</sub>/cm<sup>-1</sup>): 3050, 2996,

2948, 2878, 2770, 1654, 1618, 1500, 1478, 1374, 1332, 1288, 1186, 1166, 1146, 1030, 936, 864, 790, 774, 478; HRMS (ESI)  $m/z$  calcd for  $C_{26}H_{22}O_4$  (M+H)<sup>+</sup> 399.1591, found 399.1645.

**7,7-Dimethyl-10-(4-fluorophenyl)-6,7,8,10-tetrahydro-9H-[1,3]-dioxolo[4,5-*b*]xanthen-9-one (35).** Yield (75%) as a white solid; mp 192-194 °C; <sup>1</sup>H NMR (200 MHz, CDCl<sub>3</sub>):  $\delta_H$  (ppm) 7.25-7.07 (m, 2H, ArH), 7.00-6.80 (m, 2H, ArH), 6.59 (s, 1H, ArH), 6.45 (s, 1H, ArH), 5.91 (d, 1H,  $J$  = 1.3 Hz, OCH<sub>2</sub>O), 5.86 (d, 1H,  $J$  = 1.3 Hz, OCH<sub>2</sub>O), 4.89 (s, 1H, CH), 2.51 (s, 2H, CH<sub>2</sub>), 2.42-2.06 (m, 2H, CH<sub>2</sub>), 1.11 (s, 3H, CH<sub>3</sub>), 1.00 (s, 3H, CH<sub>3</sub>). <sup>13</sup>C NMR (50 MHz, CDCl<sub>3</sub>):  $\delta_C$  (ppm) 197.0 (C=O), 164.5 (C), 161.5 (d,  $J_{C-F}$  = 244.6 Hz, C), 147.1 (C), 144.9 (C), 144.0 (C), 142.1 (d,  $J_{C-F}$  = 2.7 Hz, C), 129.4 (d,  $J_{C-F}$  = 7.9 Hz, 2xCH), 117.3 (C), 115.3 (d,  $J_{C-F}$  = 21.3 Hz, 2xCH), 112.8 (C), 108.3 (CH), 101.7 (CH<sub>2</sub>), 98.4 (CH), 50.9 (CH<sub>2</sub>), 41.6 (CH<sub>2</sub>), 37.6 (CH), 32.3 (C), 29.5 (CH<sub>3</sub>), 27.4 (CH<sub>3</sub>); IR (KBr) ( $\nu_{max}/cm^{-1}$ ): 3072, 2962, 2954, 2890, 2774, 1650, 1620, 1602, 1504, 1480, 1438, 1372, 1334, 1296, 1192, 1166, 1146, 1096, 1030, 934, 870, 854, 788, 760, 690, 602, 536; HRMS (ESI)  $m/z$  calcd for  $C_{22}H_{19}FO_4$  (M+H)<sup>+</sup> 367.1340, found 367.1370.

**7,7-Dimethyl-10-(2-hydroxyphenyl)-6,7,8,10-tetrahydro-9H-[1,3]-dioxolo[4,5-*b*]xanthen-9-one (36).** Yield (92%) as a white solid; mp 219-222 °C; <sup>1</sup>H NMR (200 MHz, CDCl<sub>3</sub>):  $\delta_H$  (ppm) 9.10 (s, 1H, OH), 7.14-6.93 (m, 2H, Ar-H), 6.84-6.69 (m, 1H, Ar-H), 6.68-6.52 (m, 2H, Ar-H), 6.40 (s, 1H, Ar-H), 5.95-5.86 (m, 2H, OCH<sub>2</sub>O), 5.14 (s, 1H, CH), 2.52 (s, 2H, CH<sub>2</sub>), 2.43-2.18 (m, 2H, CH<sub>2</sub>), 1.13 (s, 3H, CH<sub>3</sub>), 0.95 (s, 3H, CH<sub>3</sub>). <sup>13</sup>C NMR (50 MHz, CDCl<sub>3</sub>):  $\delta_C$  (ppm) 200.7 (C=O), 167.3 (C), 153.6 (C), 147.3 (C), 145.5 (C), 145.0 (C), 133.4 (C), 129.7 (CH), 128.0 (CH), 121.4 (CH), 118.8 (CH), 117.1 (C), 113.4 (C), 108.7 (CH), 101.8 (CH<sub>2</sub>), 98.1 (CH), 50.4 (CH<sub>2</sub>), 41.8 (CH<sub>2</sub>), 32.4 (C), 31.0 (CH), 29.2 (CH<sub>3</sub>), 27.3 (CH<sub>3</sub>); IR (KBr) ( $\nu_{max}/cm^{-1}$ ): 3380, 3064, 3028, 2964, 2954, 2928, 1638, 1614, 1482, 1446, 1382, 1276, 1230, 1144, 1032, 934, 858, 760, 750. Anal. calcd. for  $C_{22}H_{20}O_5$ : C, 72.51; H, 5.53. Found: C, 72.85; H, 5.05.

**7,7-Dimethyl-10-(benzo[*d*][1,3]dioxol-5-yl)-6,7,8,10-tetrahydro-9H-[1,3]-dioxolo[4,5-*b*]xanthen-9-one (37).** Yield (71%) as a white solid; mp 185-187 °C; <sup>1</sup>H NMR (200 MHz, CDCl<sub>3</sub>):  $\delta_H$  (ppm) 6.82-6.61 (m, 3H, Ar-H), 6.57 (s, 1H, Ar-H), 6.47 (s, 1H, Ar-H), 5.93-5.60 (m, 4H, 2xOCH<sub>2</sub>O), 4.81 (s, 1H, CH), 2.49 (s, 2H, CH<sub>2</sub>), 2.35-2.07 (m, 2H, CH<sub>2</sub>), 1.10 (s, 3H, CH<sub>3</sub>), 1.03 (s, 3H, CH<sub>3</sub>). <sup>13</sup>C NMR (50 MHz, CDCl<sub>3</sub>):  $\delta_C$  (ppm) 196.8 (C=O), 164.3 (C), 147.7 (C), 146.8 (C), 146.0 (C), 144.8 (C), 143.7 (C), 140.4 (C), 120.9 (CH), 117.5 (C), 112.6 (C), 108.2 (CH), 108.1 (2xCH), 101.5 (CH<sub>2</sub>), 100.9 (CH<sub>2</sub>), 98.2 (CH), 50.8 (CH<sub>2</sub>), 41.4 (CH<sub>2</sub>), 37.8 (CH), 32.1 (C), 29.3 (CH<sub>3</sub>), 27.4 (CH<sub>3</sub>); IR (KBr) ( $\nu_{max}/cm^{-1}$ ): 3054, 3004, 2966, 2914, 1714, 1652, 1618, 1500, 1484, 1438, 1372, 1244, 1186, 1146, 1038, 932, 792, 634; HRMS (ESI)  $m/z$  calcd for  $C_{23}H_{20}O_6$  (M+H)<sup>+</sup> 393.1333, found 393.1308.

**7,7-Dimethyl-10-phenyl-6,7,8,10-tetrahydro-9H-[1,3]-dioxolo[4,5-*b*]xanthen-9-one (38).** Yield (71%) as a white solid; mp 183-185 °C; <sup>1</sup>H NMR (200 MHz, CDCl<sub>3</sub>):  $\delta_H$  (ppm) 7.22-6.90 (m, 5H, ArH), 6.49 (s, 1H, ArH), 6.39 (s, 1H, ArH), 5.79 (bs, 1H, OCH<sub>2</sub>O), 5.74 (bs, 1H,

OCH<sub>2</sub>O), 4.81 (s, 1H, CH), 2.42 (s, 2H, CH<sub>2</sub>), 2.24-2.00 (m, 2H, CH<sub>2</sub>), 1.02 (s, 3H, CH<sub>3</sub>), 0.92 (s, 3H, CH<sub>3</sub>). <sup>13</sup>C NMR (50 MHz, CDCl<sub>3</sub>): δ<sub>C</sub> (ppm) 196.9 (C=O), 164.5 (C), 147.0 (C), 146.3 (C), 144.9 (C), 144.0 (C), 128.6 (2xCH), 127.9 (2xCH), 126.6 (CH), 117.7 (C), 112.9 (C), 108.5 (CH), 101.6 (CH<sub>2</sub>), 98.3 (CH), 51.0 (CH<sub>2</sub>), 41.6 (CH<sub>2</sub>), 38.4 (CH), 32.3 (C), 29.5 (CH<sub>3</sub>), 27.5 (CH<sub>3</sub>); IR (KBr) (ν<sub>max</sub>/cm<sup>-1</sup>): 3062, 3032, 2966, 2892, 1652, 1620, 1502, 1480, 1374, 1224, 1210, 1146, 1030, 934, 872, 746, 700, 526; HRMS (ESI) *m/z* calcd for C<sub>22</sub>H<sub>20</sub>O<sub>4</sub> (M+H)<sup>+</sup> 349.1434, found 349.1479.

**10-(3-Methoxyphenyl)-7,7-dimethyl-7,8-dihydro-6H-[1,3]dioxolo[4,5-*b*]xanthen-9(10H)-one (39).** Yield (79%) as a yellow solid; mp 137-138 °C; <sup>1</sup>H NMR (200 MHz, CDCl<sub>3</sub>): δ<sub>H</sub> (ppm) 7.15 (t, 1H, *J* = 7.8 Hz, ArH), 6.87-6.76 (m, 2H, ArH), 6.72-6.63 (s, 1H, ArH), 6.58 (s, 1H, ArH), 6.51 (s, 1H, ArH), 5.89 (d, 1H, *J* = 1.3 Hz, OCH<sub>2</sub>O), 5.83 (d, 1H, *J* = 1.3 Hz, OCH<sub>2</sub>O), 4.88 (s, 1H, CH), 3.74 (s, 3H, CH<sub>3</sub>), 2.52 (s, 2H, CH<sub>2</sub>), 2.25 (bs, 2H, CH<sub>2</sub>), 1.12 (s, 3H, CH<sub>3</sub>), 1.05 (s, 3H, CH<sub>3</sub>); <sup>13</sup>C NMR (50 MHz, CDCl<sub>3</sub>): δ<sub>C</sub> (ppm) 196.9 (C=O), 164.5 (C), 159.7 (C), 147.9 (C), 146.9 (C), 144.8 (C), 143.9 (C), 129.5 (CH), 120.3 (CH), 117.5 (CH), 113.9 (CH), 112.6 (C), 111.6 (CH), 108.3 (CH), 101.6 (CH<sub>2</sub>), 98.3 (CH), 55.2 (CH<sub>3</sub>), 50.9 (CH<sub>2</sub>), 41.5 (CH<sub>2</sub>), 38.3 (CH), 32.2 (C), 29.4 (CH<sub>3</sub>), 27.5 (CH<sub>3</sub>); IR (KBr) (ν<sub>max</sub>/cm<sup>-1</sup>): 3068, 3048, 2958, 2896, 1652, 1618, 1502, 1482, 1438, 1376, 1314, 1210, 1148, 1030, 930, 880, 760, 696, 560; HRMS (ESI) *m/z* calcd for C<sub>23</sub>H<sub>22</sub>O<sub>5</sub> (M+H)<sup>+</sup> 379.1540, found 379.1499.

**7,7-Dimethyl-10-(4-hydroxy-3,5-dimethoxyphenyl)-7,8-dihydro-6H-[1,3]dioxolo[4,5-*b*]xanthen-9(10H)-one (40).** Yield (62%) as a yellow solid; mp 188-190 °C; <sup>1</sup>H NMR (200 MHz, CDCl<sub>3</sub>): δ<sub>H</sub> (ppm) 6.59 (s, 1H, ArH), 6.50 (s, 1H, ArH), 6.43 (s, 2H, ArH), 6.01-5.74 (m, 2H, OCH<sub>2</sub>O), 5.50 (s, 1H, OH), 4.79 (s, 1H, CH), 3.79 (s, 6H, 2xCH<sub>3</sub>), 2.50 (bs, 2H, CH<sub>2</sub>), 2.23 (bs, 2H, CH<sub>2</sub>), 1.10 (s, 3H, CH<sub>3</sub>), 1.04 (s, 3H, CH<sub>3</sub>); <sup>13</sup>C NMR (50 MHz, CDCl<sub>3</sub>): δ<sub>C</sub> (ppm) 197.0 (C=O), 164.5 (C), 147.1 (2xC), 146.9 (C), 144.8 (C), 143.8 (C), 137.6 (C), 133.5 (C), 117.7 (C), 112.8 (C), 108.2 (CH), 104.6 (2xCH), 101.6 (CH<sub>2</sub>), 98.2 (CH), 56.2 (2xCH<sub>3</sub>), 50.8 (CH<sub>2</sub>), 41.5 (CH<sub>2</sub>), 38.3 (CH), 32.6 (C), 29.6 (CH<sub>3</sub>), 27.1 (CH<sub>3</sub>); IR (KBr) (ν<sub>max</sub>/cm<sup>-1</sup>): 3466, 3012, 2952, 2934, 1652, 1618, 1518, 1480, 1466, 1432, 1374, 1328, 1208, 1188, 1110, 1032, 936, 788, 762, 670, 560; HRMS (ESI) *m/z* calcd for C<sub>24</sub>H<sub>24</sub>O<sub>7</sub> (M+H)<sup>+</sup> 425.1595, found 425.1581.

**7,7-Dimethyl-10-(3-hydroxyphenyl)-7,8-dihydro-6H-[1,3]dioxolo[4,5-*b*]xanthen-9(10H)-one (41).** Yield (65%) as a yellow solid; mp 137-138 °C; <sup>1</sup>H NMR (200 MHz, CDCl<sub>3</sub>): δ<sub>H</sub> (ppm) 7.18-6.99 (m, 1H, ArH), 6.97-6.82 (m, 1H, ArH), 6.76-6.38 (m, 5H, ArH, OH), 5.92 (d, 1H, *J* = 1.3 Hz, OCH<sub>2</sub>O), 5.87 (d, 1H, *J* = 1.3 Hz, OCH<sub>2</sub>O), 4.88 (s, 1H, CH), 2.52 (s, 2H, CH<sub>2</sub>), 2.12-2.38 (m, 2H, CH<sub>2</sub>), 1.12 (s, 3H, CH<sub>3</sub>), 1.03 (s, 3H, CH<sub>3</sub>); <sup>13</sup>C NMR (50 MHz, CDCl<sub>3</sub>): δ<sub>C</sub> (ppm) 198.2 (C=O), 165.3 (C), 156.3 (C), 147.8 (C), 147.0 (C), 145.0 (C), 144.0 (C), 129.9 (CH), 119.9 (CH), 117.5 (C), 115.4 (CH), 113.8 (CH), 112.9 (C), 108.5 (CH), 101.7 (CH<sub>2</sub>), 98.3 (CH), 50.9 (CH<sub>2</sub>), 41.7 (CH<sub>2</sub>), 38.3 (CH), 32.5 (C), 29.5 (CH<sub>3</sub>), 27.7 (CH<sub>3</sub>); IR (KBr) (ν<sub>max</sub>/cm<sup>-1</sup>): 3318,

2952, 2928, 2892, 1638, 1600, 1504, 1484, 1450, 1380, 1210, 1156, 1032, 930, 864, 758, 694, 620, 562; HRMS (ESI)  $m/z$  calcd for  $C_{22}H_{20}O_5$  (M+H)<sup>+</sup> 364.1311, found 364.1297.

**7,7-Dimethyl-10-(4-chlorophenyl)-7,8-dihydro-6H-[1,3]dioxolo[4,5-*b*]xanthen-9(10H)-one (42).** Yield (85%) as a yellow solid; mp 190-192 °C; <sup>1</sup>H NMR (200 MHz, CDCl<sub>3</sub>): δ<sub>H</sub> (ppm) 7.17 (bs, 4H, Ar-H), 6.59 (s, 1H, ArH), 6.43 (s, 1H, ArH), 5.88 (bs, 1H, OCH<sub>2</sub>O), 5.84 (bs, 1H, OCH<sub>2</sub>O), 4.88 (s, 1H, CH), 2.50 (s, 2H, CH<sub>2</sub>), 2.33-2.04 (m, 2H, CH<sub>2</sub>), 1.10 (s, 3H, CH<sub>3</sub>), 1.00 (s, 3H, CH<sub>3</sub>); <sup>13</sup>C NMR (50 MHz, CDCl<sub>3</sub>): δ<sub>C</sub> (ppm) 196.7 (C=O), 164.5 (C), 147.0 (C), 144.9 (C), 144.7 (C), 143.9 (C), 132.1 (C), 129.3 (2xCH), 128.6 (2xCH), 116.8 (C), 112.4 (C), 108.2 (CH), 101.6 (CH<sub>2</sub>), 98.3 (CH), 50.8 (CH<sub>2</sub>), 41.4 (CH<sub>2</sub>), 37.7 (CH), 32.2 (C), 29.4 (CH<sub>3</sub>), 27.3 (CH<sub>3</sub>); IR (KBr) (ν<sub>max</sub>/cm<sup>-1</sup>): 3044, 2956, 2930, 2884, 1714, 1650, 1618, 1508, 1484, 1442, 1376, 1214, 1168, 1090, 1032, 930, 844, 760, 564, 528; HRMS (ESI)  $m/z$  calcd for  $C_{22}H_{19}ClO_4$  (M+H)<sup>+</sup> 383.1045, found 383.1008.

**7,7-Dimethyl-10-(naphthalen-2-yl)-7,8-dihydro-6H-[1,3]dioxolo[4,5-*b*]xanthen-9(10H)-one (43).** Yield (77%) as a yellow solid; mp 179-181 °C; <sup>1</sup>H (200 MHz, CDCl<sub>3</sub>): δ<sub>H</sub> (ppm) 7.94-7.66 (m, 4H, ArH), 7.58-7.29 (m, 3H, ArH), 6.67 (s, 1H, ArH), 6.56 (s, 1H, ArH), 5.91 (d, 1H, *J* = 0.9 Hz, OCH<sub>2</sub>O), 5.84 (d, 1H, *J* = 0.9 Hz, OCH<sub>2</sub>O), 5.13 (s, 1H, CH), 2.56 (s, 2H, CH<sub>2</sub>), 2.26 (m, 2H, CH<sub>2</sub>), 1.13 (s, 3H, CH<sub>3</sub>), 1.04 (s, 3H, CH<sub>3</sub>); <sup>13</sup>C NMR (50 MHz, CDCl<sub>3</sub>): δ<sub>C</sub> (ppm) 196.9 (C=O), 164.6 (C), 147.0 (C), 144.9 (C), 144.0 (C), 143.5 (C), 133.6 (C), 132.4 (C), 128.5 (CH), 128.1 (CH), 127.7 (CH), 126.4 (CH), 126.2 (CH), 126.1 (CH), 125.6 (CH), 117.5 (C), 112.6 (C), 108.6 (CH), 101.6 (CH<sub>2</sub>), 98.4 (CH), 50.9 (CH<sub>2</sub>), 41.6 (CH<sub>2</sub>), 38.6 (CH), 32.3 (C), 29.5 (CH<sub>3</sub>), 27.5 (CH<sub>3</sub>); IR (KBr) (ν<sub>max</sub>/cm<sup>-1</sup>): 3050, 2958, 2980, 2772, 1652, 1618, 1560, 1504, 1480, 1376, 1224, 1186, 1146, 1030, 932, 888, 862, 796, 746, 670, 562; HRMS (ESI)  $m/z$  calcd for  $C_{26}H_{22}O_4$  (M+H)<sup>+</sup> 399.1591, found 399.1548.

**7,7-Dimethyl-10-(4-hydroxy-3-methoxyphenyl)-7,8-dihydro-6H-[1,3]dioxolo[4,5-*b*]xanthen-9(10H)-one (44).** Yield (59%) as a yellow solid; mp 176-178 °C; <sup>1</sup>H NMR (200 MHz, CDCl<sub>3</sub>): δ<sub>H</sub> (ppm) 6.80-6.76 (m, 2H, ArH), 6.63-6.54 (m, 2H, ArH), 6.50 (s, 1H, ArH), 5.93-5.84 (m, 3H, OCH<sub>2</sub>O, OH), 4.82 (s, 1H, CH), 3.79 (s, 3H, CH<sub>3</sub>), 2.50 (s, 2H, CH<sub>2</sub>), 2.38-2.03 (m, 2H, CH<sub>2</sub>), 1.10 (s, 3H, CH<sub>3</sub>), 1.03 (s, 3H, CH<sub>3</sub>); <sup>13</sup>C NMR (50 MHz, CDCl<sub>3</sub>): δ<sub>C</sub> (ppm) 197.2 (C=O), 164.5 (C), 146.8 (C), 146.5 (C), 144.8 (C), 144.3 (C), 143.8 (C), 138.4 (C), 120.4 (CH), 117.8 (CH), 114.6 (CH), 113.0 (C), 110.8 (CH), 108.3 (CH), 101.5 (CH<sub>2</sub>), 98.2 (CH), 55.9 (CH<sub>3</sub>), 50.8 (CH<sub>2</sub>), 41.5 (CH<sub>2</sub>), 37.8 (CH), 32.2 (C), 29.5 (CH<sub>3</sub>), 27.3 (CH<sub>3</sub>); IR (KBr) (ν<sub>max</sub>/cm<sup>-1</sup>): 3368, 3014, 2956, 2932, 1652, 1618, 1514, 1484, 1376, 1276, 1226, 1030, 920, 862, 752, 670, 632, 560; HRMS (ESI)  $m/z$  calcd for  $C_{23}H_{22}O_6$  (M+H)<sup>+</sup> 394.1416, found 394.1428.

**10-(Naphthalen-1-yl)-7,8-dihydro-6H-[1,3]dioxolo[4,5-*b*]xanthen-9(10H)-one (45).** Yield (75%) as a white solid; mp 201-202 °C; <sup>1</sup>H NMR (200 MHz, CDCl<sub>3</sub>): δ<sub>H</sub> (ppm) 8.67 (d, 1H, *J* = 8.5 Hz, ArH), 7.87 (d, 1H, *J* = 8.0 Hz, ArH), 7.77-7.61 (m, 2H, ArH), 7.58-7.22 (m, 3H, ArH),



6.68 (s, 1H, ArH), 6.54 (s, 1H, ArH), 5.94-5.80 (s, 2H, OCH<sub>2</sub>O), 5.73 (s, 1H, CH), 2.88-2.56 (s, 2H, CH<sub>2</sub>), 2.46-2.27 (m, 2H, CH<sub>2</sub>), 2.12-1.91 (m, 2H, CH<sub>2</sub>). <sup>13</sup>C NMR (50 MHz, CDCl<sub>3</sub>): δ<sub>C</sub> (ppm) 197.0 (C=O), 166.2 (C), 146.8 (C), 144.6 (C), 143.3 (2xC), 134.0 (C), 131.1 (C), 128.8 (CH), 127.2 (CH), 126.6 (CH), 126.4 (CH), 125.7 (CH), 125.5 (CH), 123.7 (CH), 118.3 (C), 114.4 (C), 107.6 (CH), 101.5 (CH<sub>2</sub>), 98.2 (CH), 37.0 (CH<sub>2</sub>), 33.3 (CH), 27.9 (CH<sub>2</sub>), 20.5 (CH<sub>2</sub>). IR (KBr) (ν<sub>max</sub>/cm<sup>-1</sup>): 3056, 2956, 2940, 2900, 2782, 1710, 1658, 1620, 1500, 1480, 1380, 1356, 1224, 1186, 1142, 1036, 1000, 936, 856, 788, 738, 674, 532, 454. HRMS (ESI) *m/z* calcd for C<sub>24</sub>H<sub>18</sub>O<sub>4</sub> (M+H)<sup>+</sup> 371.1278, found 371.1242.

**10-(4-(Methylthio)phenyl)-7,8-dihydro-6H-[1,3]dioxolo[4,5-*b*]xanthen-9(10H)-one (46).** Yield (85%) as a white solid; mp 169-171 °C; <sup>1</sup>H NMR (200 MHz, CDCl<sub>3</sub>): δ<sub>H</sub> (ppm) 7.14 (bs, 4H, Ar-H), 6.59 (s, 1H, ArH), 6.46 (s, 1H, ArH), 5.97-5.82 (m, 2H, OCH<sub>2</sub>O), 4.89 (s, 1H, CH), 2.73-2.54 (m, 2H, CH<sub>2</sub>), 2.53-2.22 (m, 5H, CH<sub>3</sub>, CH<sub>2</sub>), 2.14-1.86 (m, 2H, CH<sub>2</sub>); <sup>13</sup>C NMR (50 MHz, CDCl<sub>3</sub>): δ<sub>C</sub> (ppm) 197.1 (C=O), 166.2 (C), 147.0 (C), 144.9 (C), 144.0 (C), 143.5 (C), 136.3 (C), 128.5 (2xCH), 127.0 (2xCH), 117.4 (C), 114.0 (C), 108.3 (CH), 101.6 (CH<sub>2</sub>), 98.3 (CH), 37.7 (CH), 37.1 (CH<sub>2</sub>), 27.9 (CH<sub>2</sub>), 20.5 (CH<sub>2</sub>), 16.1 (CH<sub>3</sub>); IR (KBr) (ν<sub>max</sub>/cm<sup>-1</sup>): 3052, 2946, 2880, 2772, 1712, 1648, 1616, 1500, 1486, 1436, 1380, 1244, 1230, 1182, 1038, 998, 938, 842, 784, 744, 594, 532, 512; HRMS (ESI) *m/z* calcd for C<sub>21</sub>H<sub>18</sub>SO<sub>4</sub> (M+H)<sup>+</sup> 367.0999, found 367.1112.

**10-(4-Chlorophenyl)-7,8-dihydro-6H-[1,3]dioxolo[4,5-*b*]xanthen-9(10H)-one (47).** Yield (78%) as a yellow solid; mp 158-161 °C; <sup>1</sup>H NMR (200 MHz, CDCl<sub>3</sub>): δ<sub>H</sub> (ppm) 7.16-7.01 (m, 4H, Ar-H), 6.51 (s, 1H, ArH), 6.35 (s, 1H, ArH), 5.84 (m, 1H, OCH<sub>2</sub>O), 5.80 (m, 1H, OCH<sub>2</sub>O), 4.82 (s, 1H, CH), 2.78-2.43 (s, 2H, CH<sub>2</sub>), 2.40-2.11 (m, 2H, CH<sub>2</sub>), 2.11-1.69 (m, 2H, CH<sub>2</sub>); <sup>13</sup>C NMR (50 MHz, CDCl<sub>3</sub>): δ<sub>C</sub> (ppm) 197.2 (C=O), 166.4 (C), 147.2 (C), 145.1 (C), 144.9 (C), 144.1 (C), 132.3 (C), 129.5 (2xCH), 128.7 (2xCH), 117.1 (C), 113.9 (C), 108.3 (CH), 101.8 (CH<sub>2</sub>), 98.4 (CH), 37.8 (CH), 37.2 (CH<sub>2</sub>), 28.0 (CH<sub>2</sub>), 20.6 (CH<sub>2</sub>); IR (KBr) (ν<sub>max</sub>/cm<sup>-1</sup>): 3068, 3046, 2952, 2890, 2772, 1650, 1620, 1500, 1482, 1374, 1244, 1184, 1092, 1038, 998, 936, 844, 784, 744, 592, 530; HRMS (ESI) *m/z* calcd for C<sub>20</sub>H<sub>15</sub>ClO<sub>4</sub> (M+H)<sup>+</sup> 355.0732, found 355.0712.

**10-(4-Hydroxy-3-methoxyphenyl)-7,8-dihydro-6H [1,3]dioxolo[4,5-*b*]xanthen-9(10H)-one (48).** Yield (58%) as a yellow solid; mp 176-178 °C; <sup>1</sup>H NMR (200 MHz, CDCl<sub>3</sub>): δ<sub>H</sub> (ppm) 6.97-6.30 (m, 5H, ArH), 6.08-5.78 (m, 2H, OCH<sub>2</sub>O), 5.61 (1H, s, OH), 4.87 (1H, s, CH), 3.85 (s, 3H, CH<sub>3</sub>), 2.89-2.56 (2H, s, CH<sub>2</sub>), 2.52-2.22 (2H, m, CH<sub>2</sub>), 2.20-1.89 (2H, m, CH<sub>2</sub>); <sup>13</sup>C NMR (50 MHz, CDCl<sub>3</sub>): δ<sub>C</sub> (ppm) 197.5 (C=O), 166.2 (C), 146.9 (C), 146.4 (C), 144.9 (C), 144.3 (C), 144.1 (C), 138.7 (C), 120.6 (CH), 117.9 (C), 114.6 (C, CH), 111.0 (CH), 108.4 (CH), 101.7 (CH<sub>2</sub>), 98.3 (CH), 56.1 (CH<sub>3</sub>), 37.8 (CH), 37.2 (CH<sub>2</sub>), 28.0 (CH<sub>2</sub>), 20.6 (CH<sub>2</sub>); IR (KBr) (ν<sub>max</sub>/cm<sup>-1</sup>): 3402, 3054, 3248, 2988, 2964, 2932, 2900, 2836, 2778, 1648, 1618, 1598, 1502, 1484, 1432, 1376, 1278, 1226, 1186, 1146, 1036, 1000, 936, 892, 736, 532; HRMS (ESI) *m/z* calcd for C<sub>21</sub>H<sub>18</sub>O<sub>6</sub> (M+H)<sup>+</sup> 367.1176, found 367.1187.

**10-(4-Hydroxy-3,5-dimethoxyphenyl)-7,8-dihydro-6H-[1,3]dioxolo[4,5-*b*]xanthen-9(10H)-one (49).** Yield (55%) as a yellow solid; mp 176-178 °C; <sup>1</sup>H NMR (200 MHz, CDCl<sub>3</sub>): δ<sub>H</sub> (ppm) 6.58 (s, 1H, ArH), 6.50 (s, 1H, ArH), 6.43 (s, 2H, ArH), 6.09-5.75 (m, 2H, OCH<sub>2</sub>O), 5.52 (s, 1H, OH), 4.84 (s, 1H, CH), 3.80 (s, 6H, 2xCH<sub>3</sub>), 2.73-2.49 (s, 2H, CH<sub>2</sub>), 2.47-2.16 (m, 2H, CH<sub>2</sub>), 2.14-1.86 (m, 2H, CH<sub>2</sub>); <sup>13</sup>C NMR (50 MHz, CDCl<sub>3</sub>): δ<sub>C</sub> (ppm) 197.4 (C=O), 166.2 (C), 147.0 (2xC), 146.9 (C), 144.9 (C), 144.0 (C), 137.7 (C), 133.5 (C), 117.6 (C), 114.2 (C), 108.2 (CH), 104.9 (2xCH), 101.6 (CH<sub>2</sub>), 98.2 (CH), 56.4 (2xCH<sub>3</sub>), 38.1 (CH), 37.1 (CH<sub>2</sub>), 27.9 (CH<sub>2</sub>), 20.5 (CH<sub>2</sub>); IR (KBr) (ν<sub>max</sub>/cm<sup>-1</sup>): 3598, 3492, 2954, 2900, 2842, 1648, 1618, 1482, 1436, 1372, 1328, 1224, 1184, 1122, 1038, 1000, 938, 790, 730, 640, 532; HRMS (ESI) *m/z* calcd for C<sub>22</sub>H<sub>20</sub>O<sub>7</sub> (M+H)<sup>+</sup> 397.1282, found 397.1216.

**10-(Naphthalen-1-yl)-6,7,8,10-tetrahydro-9H-[1,3]-dioxolo[4,5-*b*]xanthen-9-one (50).** Yield (78%) as a white solid; mp 167-169 °C; <sup>1</sup>H NMR (200 MHz, CDCl<sub>3</sub>): δ<sub>H</sub> (ppm) 7.90-7.67 (m, 4H, Ar-H), 7.57-7.31 (m, 3H, Ar-H), 6.68 (s, 1H, Ar-H), 6.57 (s, 1H, Ar-H), 5.92 (bs, 1H, OCH<sub>2</sub>O), 5.85 (bs, 1H, OCH<sub>2</sub>O), 5.16 (s, 1H, CH), 2.83-2.52 (m, 2H, CH<sub>2</sub>), 2.48-2.25 (m, 2H, CH<sub>2</sub>), 2.20-1.76 (m, 2H, CH<sub>2</sub>). <sup>13</sup>C NMR (50 MHz, CDCl<sub>3</sub>): δ<sub>C</sub> (ppm) 197.1 (C=O), 166.2 (C), 147.0 (C), 144.9 (C), 144.0 (C), 143.6 (C), 133.5 (C), 132.4 (C), 128.4 (CH), 128.0 (CH), 127.6 (CH), 126.5 (CH), 126.3 (CH), 126.1 (CH), 125.6 (CH), 117.4 (C), 114.0 (C), 108.5 (CH), 101.6 (CH<sub>2</sub>), 98.3 (CH), 38.4 (CH), 37.1 (CH<sub>2</sub>), 27.9 (CH<sub>2</sub>), 20.5 (CH<sub>2</sub>); IR (KBr) (ν<sub>max</sub>/cm<sup>-1</sup>): 3074, 3048, 2958, 2888, 2788, 1650, 1616, 1504, 1480, 1372, 1200, 1186, 1148, 1032, 1000, 932, 888, 750, 674, 590, 532, 478; HRMS (ESI) *m/z* calcd for C<sub>24</sub>H<sub>18</sub>O<sub>4</sub> (M+H)<sup>+</sup> 371.1278, found 371.1328.

**10-(2-Hydroxyphenyl)-6,7,8,10-tetrahydro-9H-[1,3]-dioxolo[4,5-*b*]xanthen-9-one (51).** Yield (86%) as a white solid; mp 219-222 °C; <sup>1</sup>H NMR (200 MHz, Pyridine-*d*<sub>5</sub>): δ<sub>H</sub> (ppm) 8.70 (s, 1H, OH), 7.27 (bs, 1H, Ar-H), 7.22-6.99 (m, 3H, Ar-H), 6.93-6.72 (m, 2H, Ar-H), 6.10-5.64 (m, 3H, OCH<sub>2</sub>O, CH), 2.73-2.39 (s, 2H, CH<sub>2</sub>), 2.38-2.14 (m, 2H, CH<sub>2</sub>), 1.92-1.56 (m, 2H, CH<sub>2</sub>). <sup>13</sup>C NMR (50 MHz, Pyridine-*d*<sub>5</sub>): δ<sub>C</sub> (ppm) 196.7 (C=O), 167.3 (C), 155.0 (C), 146.8 (C), 144.9 (C), 144.0 (C), 134.4 (C), 128.8 (CH), 127.6 (CH), 120.0 (CH), 118.9 (C), 116.6 (CH), 113.3 (C), 108.3 (CH), 101.7 (CH<sub>2</sub>), 98.1 (CH), 37.0 (CH<sub>2</sub>), 31.4 (CH), 27.7 (CH<sub>2</sub>), 20.4 (CH<sub>2</sub>); IR (KBr) (ν<sub>max</sub>/cm<sup>-1</sup>): 3378, 3064, 3030, 2952, 2890, 2788, 1714, 1640, 1480, 1458, 1382, 1270, 1226, 1188, 1036, 1000, 936, 842, 752, 610, 594, 532; HRMS (ESI) *m/z* calcd for C<sub>20</sub>H<sub>16</sub>O<sub>5</sub> (M+H)<sup>+</sup> 337.1071, found 337.1112.

**10-(4-Fluorophenyl)-8,8-dimethyl-7,8-dihydro-6H-[1,3]dioxolo[4,5-*b*]xanthen-9(10H)-one (52).** Yield (85%) as a white solid; mp 198-200 °C; <sup>1</sup>H NMR (200 MHz, CDCl<sub>3</sub>): δ<sub>H</sub> (ppm) 7.23-7.06 (m, 2H, ArH), 6.97-6.78 (m, 2H, ArH), 6.59 (s, 1H, ArH), 6.45 (s, 1H, ArH), 5.90 (bs, 1H, OCH<sub>2</sub>O), 5.86 (bs, 1H, OCH<sub>2</sub>O), 4.88 (s, 1H, CH), 2.83-2.49 (m, 2H, CH<sub>2</sub>), 1.85 (t, 2H, *J* = 6.3 Hz, CH<sub>2</sub>), 1.10 (s, 3H, CH<sub>3</sub>), 1.01 (s, 3H, CH<sub>3</sub>); <sup>13</sup>C NMR (50 MHz, CDCl<sub>3</sub>): δ<sub>C</sub> (ppm) 202.0

(C=O), 164.2 (C), 161.5 (d,  $J_{C-F}$  = 243.6 Hz, C), 147.0 (C), 144.9 (C), 143.9 (C), 142.3 (d,  $J_{C-F}$  = 2.6 Hz, C), 129.3 (d,  $J_{C-F}$  = 7.9 Hz, 2xCH), 117.3 (C), 115.3 (d,  $J_{C-F}$  = 21.5 Hz, 2xCH), 112.0 (C), 108.3 (CH), 101.6 (CH<sub>2</sub>), 98.3 (CH), 40.4 (C), 38.0 (CH), 34.1 (CH<sub>2</sub>), 24.9 (CH<sub>2</sub>), 24.7 (CH<sub>3</sub>), 24.4 (CH<sub>3</sub>); IR (KBr) ( $\nu_{\max}/\text{cm}^{-1}$ ): 2966, 2928, 2902, 2864, 1652, 1624, 1602, 1506, 1438, 1374, 1330, 1246, 1142, 1090, 1034, 964, 936, 846, 788, 764, 656, 588, 548, 532; HRMS (ESI)  $m/z$  calcd for C<sub>22</sub>H<sub>19</sub>FO<sub>4</sub> (M+H)<sup>+</sup> 367.1340, found 367.1370.

**10-(3-Methoxyphenyl)-8,8-dimethyl-7,8-dihydro-6H-[1,3]dioxolo[4,5-*b*]xanthen-9(10H)-one (53).** Yield (80%) as a white solid; mp 120-121 °C; <sup>1</sup>H NMR (200 MHz, CDCl<sub>3</sub>):  $\delta_{\text{H}}$  (ppm) 7.15 (t, 1H,  $J$  = 7.8 Hz, ArH), 6.94-6.63 (m, 3H, ArH), 6.58 (s, 1H, ArH), 6.52 (s, 1H, ArH), 5.89 (bs, 1H, OCH<sub>2</sub>O), 5.84 (bs, 1H, OCH<sub>2</sub>O), 4.87 (s, 1H, CH), 3.75 (s, 3H, CH<sub>3</sub>), 2.78-2.49 (m, 2H, CH<sub>2</sub>), 1.87 (t, 2H,  $J$  = 6.2 Hz, CH<sub>2</sub>), 1.11 (s, 3H, CH<sub>3</sub>), 1.04 (s, 3H, CH<sub>3</sub>); <sup>13</sup>C NMR (50 MHz, CDCl<sub>3</sub>):  $\delta_{\text{C}}$  (ppm) 201.9 (C=O), 164.3 (C), 159.8 (C), 148.2 (C), 146.9 (C), 144.8 (C), 143.8 (C), 129.5 (CH), 120.3 (CH), 117.4(C), 113.9 (CH), 111.9 (C), 111.4 (CH), 108.3 (CH), 101.6 (CH<sub>2</sub>), 98.2 (CH), 55.2 (CH<sub>3</sub>), 40.5 (C), 38.7 (CH), 34.1 (CH<sub>2</sub>), 24.9 (CH<sub>2</sub>), 24.8 (CH<sub>3</sub>), 24.5 (CH<sub>3</sub>); IR (KBr) ( $\nu_{\max}/\text{cm}^{-1}$ ): 3052, 3024, 2966, 2932, 2900, 2838, 2776, 1652, 1624, 1582, 1482, 1438, 1374, 1314, 1268, 1188, 1136, 1036, 958, 936, 838, 768, 742, 700, 548; HRMS (ESI)  $m/z$  calcd for C<sub>23</sub>H<sub>22</sub>O<sub>5</sub> (M+H)<sup>+</sup> 379.1540, found 379.1579.

**8,8-Dimethyl-10-phenyl-6,7,8,10-tetrahydro-9H-[1,3]-dioxolo[4,5-*b*]xanthen-9-one (54).** Yield (69%) as a white solid; mp 165-167 °C; <sup>1</sup>H NMR (200 MHz, CDCl<sub>3</sub>):  $\delta_{\text{H}}$  (ppm) 7.51-6.90 (m, 5H, ArH), 6.60 (s, 1H, ArH), 6.51 (s, 1H, ArH), 5.88 (bs, 1H, OCH<sub>2</sub>O), 5.83 (bs, 1H, OCH<sub>2</sub>O), 4.92 (s, 1H, CH), 2.86-2.48 (m, 2H, CH<sub>2</sub>), 2.64-2.02 (m, 2H, CH<sub>2</sub>), 1.12 (s, 3H, CH<sub>3</sub>), 1.03 (s, 3H, CH<sub>3</sub>). <sup>13</sup>C NMR (50 MHz, CDCl<sub>3</sub>):  $\delta_{\text{C}}$  (ppm) 201.9 (C=O), 164.1 (C), 146.9 (C), 146.5 (C), 144.8 (C), 143.9 (C), 128.5 (2xCH), 127.8 (2xCH), 126.4 (CH), 117.6 (C), 112.1 (C), 108.4 (CH), 101.6 (CH<sub>2</sub>), 98.2 (CH), 40.4 (C), 38.7 (CH), 34.1 (CH<sub>2</sub>), 24.9 (CH<sub>2</sub>), 24.7 (CH<sub>3</sub>), 24.4 (CH<sub>3</sub>); IR (KBr) ( $\nu_{\max}/\text{cm}^{-1}$ ): 3052, 3030, 2968, 2928, 2870, 2782, 1652, 1624, 1504, 1480, 1438, 1374, 1326, 1226, 1188, 1142, 1034, 962, 934, 870, 842, 698, 552; HRMS (ESI)  $m/z$  calcd for C<sub>22</sub>H<sub>20</sub>O<sub>4</sub> (M+H)<sup>+</sup> 349.1434, found 349.1449.

**8,8-Dimethyl-10-(4-methoxyphenyl)-6,7,8,10-tetrahydro-9H-[1,3]-dioxolo[4,5-*b*]xanthen-9-one (55).** Yield (73%) as a white solid; mp 155-157 °C; <sup>1</sup>H NMR (200 MHz, CDCl<sub>3</sub>):  $\delta_{\text{H}}$  (ppm) 7.13 (d, 2H,  $J$  = 8.5 Hz Ar-H), 6.77 (d, 2H,  $J$  = 8.5 Hz Ar-H), 6.58 (s, 1H, Ar-H), 6.49 (s, 1H, Ar-H), 5.89 (bs, 1H, OCH<sub>2</sub>O), 5.84 (bs, 1H, OCH<sub>2</sub>O), 4.86 (s, 1H, CH), 3.73 (s, 3H, CH<sub>3</sub>), 2.80-2.45 (m, 2H, CH<sub>2</sub>), 2.00-1.64 (m, 2H, CH<sub>2</sub>), 1.11 (s, 3H, CH<sub>3</sub>), 1.02 (s, 3H, CH<sub>3</sub>). <sup>13</sup>C NMR (50 MHz, CDCl<sub>3</sub>):  $\delta_{\text{C}}$  (ppm) 202.0 (C=O), 163.9 (C), 158.1 (C), 146.8 (C), 144.8 (C), 143.9 (C), 139.0 (C), 128.8 (2xCH), 117.9 (C), 113.9 (2xCH), 112.3 (C), 108.4 (CH), 101.6 (CH<sub>2</sub>), 98.2 (CH), 55.3 (CH<sub>3</sub>), 40.5 (C), 37.9 (CH), 34.1 (CH<sub>2</sub>), 24.9 (CH<sub>2</sub>), 24.7 (CH<sub>3</sub>), 24.4 (CH<sub>3</sub>); IR (KBr) ( $\nu_{\max}/\text{cm}^{-1}$ ): 3066, 3046, 2980, 2958, 2926, 2902, 2832, 1650, 1620, 1508, 1482, 1438,

1378, 1326, 1260, 1230, 1190, 1144, 1114, 1034, 956, 936, 878, 846, 550; HRMS (ESI)  $m/z$  calcd for  $C_{23}H_{22}O_5$  (M+H)<sup>+</sup> 379.1540, found 379.1601.

**8,8-Dimethyl-10-(4-hydroxyphenyl)-7,8-dihydro-6H [1,3]dioxolo[4,5-*b*]xanthen-9(10H)-one (56).** Yield (66%) as a white solid; mp 244-246 °C; <sup>1</sup>H NMR (200 MHz, Pyridine-*d*<sub>5</sub>):  $\delta_H$  (ppm) 11.3 (bs, 1H, OH), 7.41 (d, 2H,  $J = 8.4$  Hz, Ar-H), 7.10 (d, 2H,  $J = 8.4$  Hz Ar-H), 6.87 (s, 1H, Ar-H), 6.80 (s, 1H, Ar-H), 5.96 (bs, 1H, OCH<sub>2</sub>O), 5.88 (bs, 1H, OCH<sub>2</sub>O), 5.18 (s, 1H, CH), 2.91-2.44 (m, 2H, CH<sub>2</sub>), 1.90-1.54 (m, 2H, CH<sub>2</sub>), 1.11 (s, 3H, CH<sub>3</sub>), 1.01 (s, 3H, CH<sub>3</sub>); <sup>13</sup>C NMR (50 MHz, Pyridine-*d*<sub>5</sub>):  $\delta_C$  (ppm) 202.4 (C=O), 165.2 (C), 158.7 (C), 148.3 (C), 146.3 (C), 145.3 (C), 139.4 (C), 130.6 (2xCH), 119.9 (C), 117.7 (2xCH), 113.5 (C), 109.9 (CH), 103.2 (CH<sub>2</sub>), 99.6(CH), 41.6 (C), 39.4 (CH), 35.3 (CH<sub>2</sub>), 26.0 (CH<sub>2</sub>), 25.9 (CH<sub>3</sub>), 25.6 (CH<sub>3</sub>); IR (KBr) ( $\nu_{max}/cm^{-1}$ ): 3282, 3020, 2964, 2932, 2902, 2774, 1636, 1606, 1510, 1480, 1440, 1382, 1244, 1188, 1140, 1112, 1034, 996, 934, 844, 768, 670, 554, 460; HRMS (ESI)  $m/z$  calcd for  $C_{22}H_{20}O_5$  (M+H)<sup>+</sup> 365.1384, found 365.1351.

**8,8-Dimethyl-10-(4-(methylthio)phenyl)-7,8-dihydro-6H-[1,3]dioxolo[4,5-*b*]xanthen-9(10H)-one (57).** Yield (82%) as a white solid; mp 175-176 °C; <sup>1</sup>H NMR (200 MHz, CDCl<sub>3</sub>):  $\delta_H$  (ppm) 7.13 (bs, 4H, Ar-H), 6.58 (s, 1H, ArH), 6.46 (s, 1H, ArH), 5.88 (d, 1H,  $J = 1.0$  Hz, OCH<sub>2</sub>O), 5.83 (d, 1H,  $J = 1.0$  Hz, OCH<sub>2</sub>O), 4.89 (s, 1H, CH), 2.78-2.52 (m, 2H, CH<sub>2</sub>), 2.40 (m, 3H, CH<sub>3</sub>), 2.00-1.68 (m, 2H, CH<sub>2</sub>), 1.10 (s, 3H, CH<sub>3</sub>), 1.02 (s, 3H, CH<sub>3</sub>); <sup>13</sup>C NMR (50 MHz, CDCl<sub>3</sub>):  $\delta_C$  (ppm) 201.7 (C=O), 163.9 (C), 146.6 (C), 144.5 (C), 143.5 (C), 143.4 (C), 135.8 (C), 128.0 (2xCH), 126.7 (2xCH), 117.0 (C), 111.6 (C), 108.0 (CH), 101.3 (CH<sub>2</sub>), 97.9 (CH), 40.1 (C), 37.9 (CH), 33.8 (CH<sub>2</sub>), 24.6 (CH<sub>2</sub>), 24.4 (CH<sub>3</sub>), 24.1 (CH<sub>3</sub>), 15.8 (CH<sub>3</sub>); IR (KBr) ( $\nu_{max}/cm^{-1}$ ): 3078, 2982, 2962, 2914, 2776, 1652, 1624, 1506, 1482, 1436, 1376, 1328, 1230, 1192, 1146, 1092, 1038, 960, 938, 876, 848, 772, 584, 550; HRMS (ESI)  $m/z$  calcd for  $C_{23}H_{22}SO_4$  (M+H)<sup>+</sup> 395.1540, found 395.1301.

**8,8-Dimethyl-10-(benzo[*d*][1,3]dioxol-5-yl)-7,8-dihydro-6H-[1,3]dioxolo[4,5-*b*]xanthen-9(10H)-one (58).** Yield (76%) as a white solid; mp 201-202 °C; <sup>1</sup>H NMR (200 MHz, CDCl<sub>3</sub>):  $\delta_H$  (ppm) 6.79-6.60 (m, 3H, Ar-H), 6.56 (s, 1H, Ar-H), 6.49 (s, 1H, Ar-H), 6.02-5.58 (m, 4H, 2xOCH<sub>2</sub>O), 4.81 (s, 1H, CH), 2.78-2.47 (m, 2H, CH<sub>2</sub>), 2.00-1.67 (m, 2H, CH<sub>2</sub>), 1.10 (s, 3H, CH<sub>3</sub>), 1.04 (s, 3H, CH<sub>3</sub>); <sup>13</sup>C NMR (50 MHz, CDCl<sub>3</sub>):  $\delta_C$  (ppm) 201.9 (C=O), 164.1 (C), 147.7 (C), 146.8 (C), 146.0 (C), 144.7 (C), 143.7 (C), 140.7 (C), 120.8 (CH), 117.6 (C), 111.9 (C), 108.2 (3xCH), 101.6(CH<sub>2</sub>), 100.9 (CH<sub>2</sub>), 98.2 (CH), 40.4 (C), 38.3 (CH), 34.1 (CH<sub>2</sub>), 24.8 (CH<sub>2</sub>), 24.7 (CH<sub>3</sub>), 24.4 (CH<sub>3</sub>); IR (KBr) ( $\nu_{max}/cm^{-1}$ ): 3068, 3048, 2968, 2930, 1646, 1620, 1558, 1482, 1440, 1378, 1232, 1190, 1146, 1036, 960, 936, 764, 670, 550; HRMS (ESI)  $m/z$  calcd for  $C_{23}H_{20}O_6$  (M+H)<sup>+</sup> 393.1333, found 393.1310.

**8,8-Dimethyl-10-(4-chlorophenyl)-7,8-dihydro-6H-[1,3]dioxolo[4,5-*b*]xanthen-9(10H)-one (59).** Yield (89%) as a yellow solid; mp 190-192 °C; <sup>1</sup>H NMR (200 MHz, CDCl<sub>3</sub>):  $\delta_H$  (ppm)

7.26-7.04 (m, 4H, Ar-H), 6.59 (s, 1H, ArH), 6.44 (s, 1H, ArH), 5.91 (bs, 1H, OCH<sub>2</sub>O), 5.86 (bs, 1H, OCH<sub>2</sub>O), 4.87 (s, 1H, CH), 2.84-2.46 (m, 2H, CH<sub>2</sub>), 1.85 (t, 2H, *J* = 6.3 Hz CH<sub>2</sub>), 1.10 (s, 3H, CH<sub>3</sub>), 1.01 (s, 3H, CH<sub>3</sub>); <sup>13</sup>C NMR (50 MHz, CDCl<sub>3</sub>): δ<sub>C</sub> (ppm) 202.0 (C=O), 164.3 (C), 147.1(C), 145.1 (C), 144.9 (C), 143.9 (C), 132.2 (C), 129.3 (2xCH), 128.7 (2xCH), 117.0 (C), 111.8 (C), 108.3 (CH), 101.7 (CH<sub>2</sub>), 98.3 (CH), 40.5 (C), 38.3 (CH), 34.1 (CH<sub>2</sub>), 24.9 (CH<sub>2</sub>), 24.7 (CH<sub>3</sub>), 24.4 (CH<sub>3</sub>); IR (KBr) (ν<sub>max</sub>/cm<sup>-1</sup>): 3028, 2960, 2926, 2868, 2786, 1654, 1622, 1504, 1486, 1438, 1408, 1372, 1330, 1230, 1190, 1140, 1092, 1034, 962, 934, 840, 768, 584, 466; HRMS (ESI) *m/z* calcd for C<sub>22</sub>H<sub>19</sub>ClO<sub>4</sub> (M+H)<sup>+</sup> 383.1045, found 383.1021.

**8,8-Dimethyl-10-(naphthalen-1-yl)-7,8-dihydro-6H-[1,3]dioxolo[4,5-*b*]xanthen-9(10H)-one (60).** Yield (84%) as a white solid; mp 184-185 °C; <sup>1</sup>H NMR (200 MHz, CDCl<sub>3</sub>): δ<sub>H</sub> (ppm) 8.68 (d, 1H, *J* = 8.2 Hz, ArH), 7.87 (d, 1H, *J* = 8.1 Hz, ArH), 7.76-7.59 (m, 2H, ArH), 7.57-7.20 (m, 3H, ArH), 6.66 (s, 1H, ArH), 6.54 (s, 1H, ArH), 5.92-5.77 (bs, 2H, OCH<sub>2</sub>O), 5.71 (s, 1H, CH), 2.98-2.54 (m, 2H, CH<sub>2</sub>), 1.92 (t, 2H, *J* = 6.2 Hz, CH<sub>2</sub>), 1.15 (s, 3H, CH<sub>3</sub>), 1.01 (s, 3H, CH<sub>3</sub>); <sup>13</sup>C NMR (50 MHz, CDCl<sub>3</sub>): δ<sub>C</sub> (ppm) 201.9 (C=O), 164.2 (C), 146.8 (C), 144.5 (C), 143.7 (C), 143.1 (C), 134.0 (C), 131.2 (C), 128.9 (CH), 127.1 (CH), 126.5 (CH), 126.1 (CH), 125.7 (CH), 125.6 (CH), 123.5 (CH), 118.2 (C), 112.4 (C), 107.6 (CH), 101.4 (CH<sub>2</sub>), 98.2 (CH), 40.4 (C), 34.2 (CH<sub>2</sub>), 33.4 (CH), 24.9 (CH<sub>2</sub>), 24.4 (2xCH<sub>3</sub>); IR (KBr) (ν<sub>max</sub>/cm<sup>-1</sup>): 3056, 3010, 2958, 2902, 2854, 2774, 1712, 1656, 1622, 1502, 1480, 1374, 1322, 1226, 1188, 1142, 1040, 960, 936, 836, 784, 738, 616, 546, 492; HRMS (ESI) *m/z* calcd for C<sub>26</sub>H<sub>22</sub>O<sub>4</sub> (M+H)<sup>+</sup> 399.1591, found 399.1611.

**10-(4-Hydroxy-3,5-dimethoxyphenyl)-8,8-dimethyl-7,8-dihydro-6H-[1,3]dioxolo[4,5-*b*]xanthen-9(10H)-one (61).** Yield (71%) as a white solid; mp 193-195 °C; <sup>1</sup>H NMR (200 MHz, CDCl<sub>3</sub>): δ<sub>H</sub> (ppm) 6.56 (s, 1H, ArH), 6.51 (s, 1H, ArH), 6.41 (s, 2H, ArH), 5.88 (bs, 1H, OCH<sub>2</sub>O), 5.84 (bs, 1H, OCH<sub>2</sub>O), 5.46 (bs, 1H, OH), 4.79 (s, 1H, CH), 3.79 (s, 6H, 2xCH<sub>3</sub>), 2.77-2.46 (m, 2H, CH<sub>2</sub>), 1.85 (t, 2H, *J* = 6.1 Hz, CH<sub>2</sub>), 1.08 (s, 3H, CH<sub>3</sub>), 1.03 (s, 3H, CH<sub>3</sub>); <sup>13</sup>C NMR (50 MHz, CDCl<sub>3</sub>): δ<sub>C</sub> (ppm) 202.0 (C=O), 164.0 (C), 147.0 (2xC), 146.8 (C), 144.7 (C), 143.7(C), 137.9 (C), 133.4 (C), 117.5 (C), 112.0 (C), 108.2 (CH), 104.5 (2xCH), 101.6 (CH<sub>2</sub>), 98.1 (CH), 56.3 (2xCH<sub>3</sub>), 40.5 (C), 38.6 (CH), 34.2 (CH<sub>2</sub>), 24.8 (CH<sub>2</sub>), 24.7 (CH<sub>3</sub>), 24.4 (CH<sub>3</sub>); IR (KBr) (ν<sub>max</sub>/cm<sup>-1</sup>): 3398, 2958, 2928, 2892, 2838, 2784, 1652, 1620, 1518, 1482, 1428, 1376, 1328, 1228, 1192, 1122, 1026, 966, 922, 862, 834, 772, 742, 682, 580; HRMS (ESI) *m/z* calcd for C<sub>24</sub>H<sub>24</sub>O<sub>7</sub> (M+H)<sup>+</sup> 425.1595, found 425.1580.

**8,8-Dimethyl-10-(naphthalen-2-yl)-7,8-dihydro-6H-[1,3]dioxolo[4,5-*b*]xanthen-9(10H)-one (62).** Yield (90%) as a yellow solid; mp 173-175 °C; <sup>1</sup>H NMR (200 MHz, CDCl<sub>3</sub>): δ<sub>H</sub> (ppm) 7.84-7.50 (m, 4H, ArH), 7.46-7.09 (m, 3H, ArH), 6.53 (s, 1H, ArH), 6.42 (s, 1H, ArH), 5.79 (bs, 1H, OCH<sub>2</sub>O), 5.72 (bs, 1H, OCH<sub>2</sub>O), 4.98 (s, 1H, CH), 2.72-2.45 (m, 2H, CH<sub>2</sub>), 1.76 (t, 2H, *J* = 5.9 Hz, CH<sub>2</sub>), 1.01 (s, 3H, CH<sub>3</sub>), 0.89 (s, 3H, CH<sub>3</sub>); <sup>13</sup>C NMR (50 MHz, CDCl<sub>3</sub>): δ<sub>C</sub> (ppm) 202.0 (C=O), 164.3 (C), 147.0 (C), 144.8 (C), 143.9 (C), 143.8 (C), 133.6 (C), 132.4 (C), 128.4(CH),

128.1 (CH), 127.7 (CH), 126.4 (CH), 126.3 (CH), 126.0 (CH), 125.6 (CH), 117.4 (C), 111.9 (C), 108.5 (CH), 101.6 (CH<sub>2</sub>), 98.3 (CH), 40.5 (C), 39.0 (CH), 34.1 (CH<sub>2</sub>), 24.9 (CH<sub>2</sub>), 24.7 (CH<sub>3</sub>), 24.4 (CH<sub>3</sub>); IR (KBr) ( $\nu_{\max}/\text{cm}^{-1}$ ): 3052, 3030, 2968, 2928, 2870, 2782, 1652, 1624, 1504, 1480, 1438, 1374, 1326, 1226, 1188, 1142, 1034, 962, 934, 870, 842, 772, 738, 698, 580, 478; HRMS (ESI)  $m/z$  calcd for C<sub>26</sub>H<sub>22</sub>O<sub>4</sub> (M+H)<sup>+</sup> 399.1591, found 399.1573.
